# 1 **Highly replicated evolution of parapatric ecotypes**

2 James, M. E.<sup>1</sup>, Arenas-Castro, H<sup>1</sup>, Groh, J. S.<sup>1,2</sup>, Engelstädter, J.<sup>1</sup>, and D. Ortiz-Barrientos<sup>1</sup>.

3 <sup>1</sup>The University of Queensland, School of Biological Sciences, St. Lucia QLD 4072,  
4 Australia. <sup>2</sup>Current address: University of California, Davis, Department of Evolution and  
5 Ecology, Davis, CA 95616, United States.

## 6 **Abstract**

7 Parallel evolution of ecotypes occurs when selection independently drives the evolution of  
8 similar traits across similar environments. The multiple origin of ecotypes is often inferred on  
9 the basis of a phylogeny which clusters populations according to geographic location and not  
10 by the environment they occupy. In contrast, when ecotypes arise once, expand their range  
11 and colonise similar environments, their populations cluster by ecology and not geography.  
12 However, discriminating between these scenarios is difficult because gene flow upon  
13 secondary contact can create the appearance of multiple origins despite a true single origin  
14 history. Here, we convincingly demonstrate multiple origins within the Dune and Headland  
15 ecotypes of an Australian wildflower, *Senecio lautus*. We observed phylogenetic clustering  
16 by geography and strong genetic structure between populations. There was surprisingly little  
17 gene flow between parapatric ecotypes, which is not high enough to obscure a single origin  
18 history. Overall, our work highlights the importance of demonstrating that populations have  
19 arisen repeatedly and independently within studies of parallel evolution.

## 20 **Introduction**

21 Governed by natural selection, parallel evolution occurs when populations evolve similar  
22 traits after repeatedly and independently colonising similar habitats (Schluter & Nagel, 1995).  
23 The patchy distribution of phenotypically similar populations means they frequently occur  
24 next to other contrasting forms (e.g., plant species inhabiting serpentine and non-serpentine  
25 soils in Scandinavia (Berglund *et al.*, 2003), and marine snails adapted to crab predators or  
26 wave action along the rocky coasts of Spain (Johannesson *et al.*, 2010). Parallel evolution by  
27 natural selection creates consistent patterns of phenotypic similarity and divergence that can  
28 extend to morphological (Elmer *et al.*, 2010; Ravinet *et al.*, 2013; Perreault-Payette *et al.*,  
29 2017), behavioural (York & Fernald, 2017), and reproductive (Smith & Rausher, 2011) traits.  
30 The nature of parallel trait evolution largely depends on the demographic history of the  
31 system under investigation, where the interplay of geography, gene flow, and natural  
32 selection with the genetic architecture of traits determines its repeatability (Orr, 2005; Stern  
33 & Orgogozo, 2009; Rosenblum *et al.*, 2014; Lenormand *et al.*, 2016; Stoltzfus &  
34 McCandlish, 2017; Blount *et al.*, 2018; Yeaman *et al.*, 2018). However, it is surprisingly rare  
35 for studies of parallel evolution to convincingly demonstrate that populations have arisen in  
36 an independent and repeated fashion (hereafter multiple origin). Ruling out alternative  
37 demographic scenarios, such as a single origin of forms followed by gene flow upon  
38 secondary contact, is seldomly performed (but see Quesada *et al.*, 2007; Bierne *et al.*, 2013;  
39 Butlin *et al.*, 2014; Pérez-Pereira *et al.*, 2017, and see Ostevik *et al.*, 2012 for a critical  
40 review of the evidence in plants). In light of this, researchers may incorrectly assume a  
41 parallel colonisation history, leading to inaccurate inferences about the prevalence of parallel  
42 evolution in nature.

43 Typically, researchers of parallel evolution by natural selection ask whether phylogenetic  
44 clustering of populations coincides with the geography and not with the ecology of  
45 populations (Allender *et al.*, 2003; Quesada *et al.*, 2007; Johannesson *et al.*, 2010; Butlin *et al.*,  
46 2014; Trucchi *et al.*, 2017). This is because genetic clustering of geographically close  
47 populations implies dispersal might be geographically restricted (i.e., isolation by distance;  
48 Wright, 1943), and colonisation of contrasting and neighbouring habitats might have  
49 occurred independently many times. However, alternative historical scenarios could also lead  
50 to clustering of populations by geography, and must be ruled out before examining the  
51 evolution of traits in light of parallel evolution (Endler, 1977; Barton & Hewitt, 1985; Coyne

52 & Orr, 2004; Bierne *et al.*, 2013). To understand this problem, first consider a scenario where  
53 an ancestral population gives rise to two locally adapted populations that occupy distinct yet  
54 geographically proximate habitats (hereafter ecotypes, Figure 1A). These two populations  
55 migrate and colonise new localities, where the same contrasting habitats are geographically  
56 close each time. This scenario of a single split followed by range expansion of two ecotypes  
57 does not have a parallel colonisation and adaptation history because each ecotype only arose  
58 once (rather than multiple independent times after independent colonisation of contrasting  
59 habitats). Because gene flow is either not possible after the original ecotypic split, or does not  
60 homogenise adjacent populations after range expansion, populations sharing the same  
61 ecology form reciprocally monophyletic clades in a phylogeny (Figure 1A).

62 Nevertheless, if there is sufficient gene flow between geographically close populations from  
63 two ecotypes that originated only once, the original phylogenetic signal of reciprocal  
64 monophyly can be eroded (Endler, 1977; Barton & Hewitt, 1985; Coyne & Orr, 2004; Bierne  
65 *et al.*, 2013). In other words, as the original signal of a single origin disappears, populations  
66 become most related to their neighbouring population and not to the other populations of the  
67 same ecotype. Therefore, gene flow can result in grouping of populations by geography  
68 rather than ecology if many loci are homogenised (Figure 1B). This phylogenetic signal is  
69 identical to that of true parallel evolution (a multiple origin scenario), where populations  
70 from two ecotypes arise multiple independent times (Figure 1C). Gene flow dynamics can  
71 thus fundamentally alter our interpretation of parallel evolution, to the extent that we can  
72 mistakenly infer parallel evolution in systems where secondary contact after range expansion  
73 of a single origin fused the history of locally adapted populations (Endler, 1977; Barton &  
74 Hewitt, 1985; Coyne & Orr, 2004; Bierne *et al.*, 2013).

75 However, not all levels of gene flow have the same equivocal effect in the genetic record of  
76 colonisation history (Bierne *et al.*, 2013). This makes it difficult to distinguish single from  
77 multiple origins of ecotypes. Systems of parallel evolution frequently detect gene flow  
78 between populations, especially when contrasting ecotypes are in close geographic proximity  
79 (i.e. parapatry). However, only few studies comprehensively model the demographic history  
80 of populations (Quesada *et al.*, 2007; Bierne *et al.*, 2013; Butlin *et al.*, 2014; Meier *et al.*,  
81 2017; Pérez-Pereira *et al.*, 2017; Trucchi *et al.*, 2017), and even fewer have used simulations  
82 to address whether the levels of gene flow can obscure the observed phylogeny (Bierne *et al.*,  
83 2013; Pérez-Pereira *et al.*, 2017). The system that has perhaps most clearly demonstrated the

84 parallel origins of forms in the presence of gene flow is the marine snail *Littorina saxatilis*.  
85 Multiple lines of evidence suggest the wave and crab ecotypes have evolved multiple  
86 independent times along rocky coastlines (Quesada *et al.*, 2007; Johannesson *et al.*, 2010;  
87 Bierne *et al.*, 2013; Butlin *et al.*, 2014; Pérez-Pereira *et al.*, 2017). Also, an obvious extreme  
88 case of multiple origins arises when parallel evolution occurs between geographically distant  
89 populations where lack of gene flow cannot obscure the history of colonisation (e.g.,  
90 threespine stickleback populations that colonise separate continents (Magalhaes *et al.*, 2019) .  
91 However, in other systems where gene flow is moderate between ecotypes (Rougemont *et al.*,  
92 2015; Le Moan *et al.*, 2016; Rougeux *et al.*, 2017, 2019; Herman *et al.*, 2018), it remains  
93 unclear to what extent gene flow contributed to the signal of parallel evolution.

94 Identifying the genetic basis of parallel trait evolution often provides unambiguous evidence  
95 for parallel evolution of ecotypes. For instance, in sticklebacks, the repeated evolution of  
96 pelvic loss in separate populations relied on different mutations in the same gene, suggesting  
97 this adaptive trait has arisen multiple independent times (Chan *et al.*, 2010). Conversely, in  
98 systems where the exact same mutation is repeatedly involved in adaptation (Colosimo *et al.*,  
99 2005), it is more difficult to identify whether the trait was repeatedly selected for (i.e. via  
100 standing genetic variation), rather than arising once followed by the repeated colonisation of  
101 similar environments (Lee & Coop, 2019). Knowing the causal genes of adaptation is ideal as  
102 the demographic history of individual adaptive loci can be modelled, avoiding the  
103 complications of distinguishing between single and multiple origins using neutral  
104 polymorphisms (as described above). However, directly isolating the specific genes involved  
105 in adaptation is infeasible in most non-model organisms, particularly because genetic  
106 experiments are not feasible or the genetic architecture of adaptation is highly polygenic  
107 (Tiffin & Ross-Ibarra, 2014; Yeaman, 2015).

108 The above considerations suggest we need to characterise the origin and colonisation history  
109 of forms as well as the repeated evolution of traits in systems where populations have adapted  
110 to similar environments. Such an approach will clarify the possible role of natural selection in  
111 shaping diversity in systems with broad geographic and ecological ranges, thus paving the  
112 way for understanding the molecular basis of adaptation and its implications for our  
113 understanding of predictability and repeatability in evolution. In this work, we characterise  
114 the origin and colonisation history of *Senecio lautus*, an Australian wildflower that appears to  
115 have evolved multiple times in parapatry into two contrasting coastal forms called Dune and

116 Headland ecotypes (Roda *et al.*, 2013; Melo *et al.*, 2014). The two forms differ in their  
117 growth habit: the Dune ecotype is erect and colonises sand dunes, and the Headland ecotype  
118 is prostrate, forming mats on the ground of rocky headlands (Ali, 1964; Radford *et al.*, 2004;  
119 Thompson, 2005). These locally adapted populations (Richards & Ortiz-Barrientos, 2016;  
120 Walter *et al.*, 2016) are separated by strong extrinsic reproductive isolation (Melo *et al.*,  
121 2014; Richards *et al.*, 2016) and exhibit similar morphology of each ecotype across  
122 populations (James *et al.*, 2020). With this work we hope to clearly illustrate how the  
123 demographic history of populations affects the evidence for the independent and repeated  
124 origins of parapatric populations.

125 Previous work using pools of DNA sequences from multiple coastal, inland, alpine, and  
126 woodland *S. lautus* ecotypes found that strong isolation by distance separated all populations  
127 along the coast and that geography, not ecology, explained the phylogenetic clustering of its  
128 coastal populations (Roda *et al.*, 2013). Although these results suggest that the Dune and  
129 Headland ecotypes have evolved in parallel, it remains unclear if gene flow could be  
130 responsible for this pattern of ecotypic and geographic differentiation, thus potentially  
131 affecting our inferences on the number of independent colonisations and origins of Dune and  
132 Headland populations. Here, we directly estimate patterns of gene flow within and between  
133 Dune and Headland ecotypes, as well as other demographic parameters important for  
134 characterising the colonisation history of this system. We use estimates of demographic  
135 parameters in forward population genetic simulations to explore the conditions that would  
136 favour a phylogenetic transition from clustering by their ecology to clustering by their  
137 geography, thus helping us gain further confidence on our conclusions about parallel  
138 parapatric divergence in this system. Our results illustrate the way we understand parallel  
139 evolution and pave the way for analyses of parallel trait evolution driven by natural selection  
140 in plants, where cases of parallelism remain understudied.

## 141 **Methods**

### 142 **Sample collection and DNA extraction**

143 Leaf samples for DNA extraction were collected from 23 Dune and Headland populations of  
144 *Senecio lautus* along the coast of Australia, which included eight parapatric Dune-Headland  
145 population pairs, three allopatric Headland populations, and three allopatric Dune populations  
146 ( $n_{\text{mean}} = 58$ ,  $n_{\text{total}} = 1338$ ; Figure 2A, Table S1). We sampled mature (flowering) plants evenly

147 across the geographic range of each population, ensuring that sampled plants were at least  
148 one metre apart. DNA was extracted using a modified CTAB protocol (Clarke, 2009) and  
149 cleaned with Epoch Life Sciences spin columns. We quantified sample concentration with the  
150 Invitrogen Quant-iT PicoGreen dsDNA Assay Kit, and used the BioTek Take3 Micro-  
151 Volume Plate to ensure DNA samples were pure. Samples were standardised to 10ng/uL.

## 152 **GBS library construction**

153 We created reduced representation libraries by using a two-enzyme Genotyping-by-  
154 Sequencing (GBS) approach (modified from Poland *et al.*, 2012). We created seven libraries,  
155 each containing 192 barcoded individuals. For each individual, genomic DNA was digested  
156 with the restriction enzymes Pst1-HF (New England Biosciences; NEB) and Msp1 (NEB).  
157 Forward and reverse barcodes were ligated to fragments from each sample, and subsequently  
158 cleaned with homemade Serapure beads (Faircloth & Glenn, 2011; Rohland & Reich, 2012).  
159 For each sample we amplified the fragments and added Illumina sequencing primers via  
160 PCRs. Each sample was quantified with the Invitrogen Quant-iT PicoGreen dsDNA Assay  
161 Kit. We created seven equimolar pools (192 individuals per pool), ensuring each population  
162 was evenly distributed across the pools. Each pool was size-selected on the BluePippin (2%  
163 DF Marker V1, 300-500bp; Sage Science), and cleaned with the Monarch PCR & DNA  
164 cleanup kit (NEB). Pooled libraries were sent to Beijing Genomics Institute for sequencing  
165 on seven lanes of the HiSeq4000, with 100bp paired-end sequencing.

## 166 **Bioinformatics**

167 The Beijing Genomics Institute removed forward barcodes and quality filtered the raw reads  
168 to remove reads containing Illumina adaptors, low quality reads ( $> 50\%$  of bases  $< Q10$ ), and  
169 reads with  $> 10\%$  Ns. We trimmed reverse barcodes with *TagCleaner* standalone v0.12  
170 (Schmieder *et al.*, 2010). We retained an average of 2,849,159 clean reads (SD = 827,036)  
171 across the 1,319 individuals (after the removal of 19 individuals with high missing data, see  
172 below; Table S2). Reads were mapped to the *S. lautus* reference PacBio genome v1.0  
173 (Wilkinson, 2019) with *BWA-MEM* v0.7.15 (Li & Durbin, 2009; Li, 2013). On average, 86%  
174 of reads (SD = 15) mapped to the reference genome, and 81% (SD = 15) mapped properly  
175 with their paired read (Table S2). *PicardTools* v2.7.0 (Broad Institute, 2019) was used to  
176 clean aligned reads and to add read groups (PCR duplicates were not marked for removal).  
177 We jointly called all variant and invariant sites for each population with *FreeBayes* v1.1.0



178 (Garrison & Marth, 2012). Because SNPs were separately called for each of the 23  
179 populations, we first normalised the 23 VCF files before merging them together. This was  
180 achieved by first using BCFtools v1.4.1 (Li *et al.*, 2009) to split multiallelic sites into biallelic  
181 records. Each file was then normalised by re-joining biallelic sites into multiallelic records.  
182 We then left-aligned and normalised indels, and used *vt* (Tan *et al.*, 2015) to decompose  
183 biallelic block substitutions into separate SNPs for each population. We then merged the 23  
184 per-population VCF files into one large file for subsequent SNP filtering.

185 We largely followed the *dDocent* pipeline for SNP filtering (Puritz *et al.*, 2014a; b), including  
186 iterative filtering to maximise the number of sampled SNPs (O’Leary *et al.*, 2018). Using  
187 *VCFtools* v0.1.15 (Danecek *et al.*, 2011), we first retained sites if they were present in > 50%  
188 of individuals, had a minimum quality score of 30, and a minimum minor allele count of 1.  
189 We then filtered for a minimum depth of 3 for a genotype call. Individuals were removed if  
190 they contained > 40% missing data. We then filtered for a maximum mean depth of 100, and  
191 a minimum mean depth of 10. We filtered for missing data per population, removing sites if  
192 they contained > 50% of missing data within each population. We refiltered for an overall  
193 missing data of 20%. Indels were removed with *vcflib* (Garrison, 2016). We then filtered for  
194 population-specific Hardy Weinberg Equilibrium using the *filter\_hwe\_by\_pop.pl* script  
195 within *dDocent*. See below for the minor allele frequency thresholds for each analysis.

## 196 **Do populations cluster by geography or ecotype?**

197 To explore the broad patterns of genetic clustering of populations, we performed two separate  
198 analyses: phylogeny construction and *fastSTRUCTURE* (Raj *et al.*, 2014). We used *PLINK*  
199 v1.9 (Purcell *et al.*, 2007) to filter for a minor allele frequency of 0.05 and also to thin SNPs  
200 by retaining one unlinked SNP per rad locus. This dataset contained 3,844 unlinked SNPs  
201 across the 1,319 individuals. We generated a maximum likelihood phylogeny within *IQ-*  
202 *TREE* v1.6.0 (Nguyen *et al.*, 2015) using the polymorphisms-aware phylogenetic model  
203 (Schrempf *et al.*, 2016). We first used ModelFinder (Kalyaanamoorthy *et al.*, 2017) to  
204 determine the best-fit substitution model for the data (TVMe+FQ+P+N9+G4), and increased  
205 the virtual population size (N) to the maximum value of 19 (as recommended by Schrempf *et*  
206 *al.*, 2016). Default parameters were used for tree construction, with the western Australia  
207 D09 population assigned as the outgroup. To assess convergence, we undertook 10 separate  
208 runs of IQ-TREE and examined tree topology (which remained unchanged with 10  
209 independent runs). We also ensured that the log-likelihood values were stable at the end of

210 each run. Branch support was performed using 10,000 replicates of UFboot (Hoang *et al.*,  
211 2018), and 10,000 replicates of SH-aLRT (Guindon *et al.*, 2010).

212 We further explored broad patterns of population structure using the variational Bayesian  
213 framework, *fastSTRUCTURE* v1.0 (Raj *et al.*, 2014). Here, we implement *fastSTRUCTURE*  
214 as extra evidence for whether populations genetically cluster by geography or ecotype. We do  
215 not infer specific historical admixture scenarios from *fastSTRUCTURE*, as different  
216 demographic scenarios can give rise to indistinguishable structure plots (Lawson *et al.*,  
217 2018). The *fastSTRUCTURE* algorithm assigns individuals into genetic clusters (K) by  
218 minimising departures from Hardy-Weinberg equilibrium and inferring individual ancestry  
219 proportions to each genetic cluster. We ran the simple prior (K = 1-30) with 100 independent  
220 runs per K-value. In order to determine the most likely number of genetic clusters (the  
221 optimal K), we used the *chooseK.py* script from *fastSTRUCTURE* to examine (1) the K-value  
222 that best explained the structure in the data (the smallest number of model components that  
223 accounted for almost all of the ancestry in the sample), and (2) the K-value that maximised  
224 the marginal likelihood of the data. Results were summarised and plotted in the R package  
225 *pophelper* v2.2.7 (Francis, 2017).

## 226 **Is there gene flow across the system?**

227 To explore patterns of gene flow in a phylogenetic context, we used *TreeMix* v1.13 (Pickrell  
228 & Pritchard, 2012). *TreeMix* constructs a bifurcating maximum likelihood tree, identifies  
229 populations that are poor fits to the model, and sequentially adds migration events that  
230 improve the fit of the data. We filtered our data for MAF 0.01, retaining 24,933 SNPs across  
231 the 1,319 individuals. We constructed an initial 25 maximum likelihood trees with no  
232 migration, 1000 bootstrap replicates in blocks of 50 SNPs with D09 as the assigned outgroup,  
233 and selected the tree with the highest log-likelihood as the input tree for all subsequent  
234 analyses. We then tested between 1-25 migration events in blocks of 50 SNPs. Trees and  
235 migration events were robust to varying the size of the linkage blocks as well as the MAF  
236 threshold of the dataset (data not shown). To select the number of migration events, we  
237 examined the log-likelihoods and cumulative variance explained by each model, as well as  
238 performed jackknife estimates to obtain the standard error and significance of the weight of  
239 each migration event. However, the interpretation of these P-values should be treated with  
240 caution due to possible errors in the tree structure as well as the inference of incorrect  
241 migration events (Pickrell & Pritchard, 2012).



242 To more formally test for admixture, we used the *threepop* function in *TreeMix* to calculate  
243  $f_3$ -statistics (Reich *et al.*, 2009). The  $f_3$ -statistic determines whether a particular population  
244 ( $A$ ) is the result of admixture between two other populations ( $B$  and  $C$ ). It measures the  
245 difference in allele frequencies between populations  $A$  and  $B$ , and populations  $A$  and  $C$ , so  $f_3$   
246 can be interpreted as the amount of shared genetic drift between two populations from a  
247 common ancestor. In the absence of admixture,  $f_3(A; B, C)$  will be positive, whereas a  
248 significantly negative value of  $f_3$  provides evidence for  $A$  being admixed from  $B$  and  $C$ . We  
249 calculated  $f_3$  for all triads of populations with jackknifing in blocks of 50 SNPs to obtain Z-  
250 scores for calculating statistical significance ( $Z\text{-score} < -3.8 = P < 0.0001$ ).

251 The erect phenotype is common across Australian species of the genus *Senecio* (Thompson,  
252 2005), except the prostrate *S. lautus* Headland ecotype and a few Alpine populations,  
253 suggesting these prostrate forms are derived. We tested for isolation by distance (IBD;  
254 Wright, 1943) in the ancestral and derived ecotypes to evaluate similarities in their dispersal  
255 dynamics (Slatkin, 1993). We tested for IBD using migration rates ( $2Nm$ ) inferred in  
256 *fastsimcoal2* (see below) as well as Slatkin's  $\hat{M}$ ,  $(1 / F_{ST} - 1) / 4$ , as a proxy for gene flow  
257 (Slatkin, 1993). For Slatkin's  $\hat{M}$ , we used the dataset excluding the western Australia  
258 populations (D09 and D35), with a MAF of 0.05, and calculated pairwise  $F_{ST}$  in VCFtools.  
259 We calculated pairwise geographic distances using the following formula, which uses the  
260 spherical law of cosines to consider the curvature of the earth:  
261  $6378137 * \text{acos}(\sin(\text{lat}1) * \sin(\text{lat}2) + \cos(\text{lat}1) * \cos(\text{lat}2) * \cos(\text{long}1 - \text{long}2))$ , where 6378137 is  
262 earth's radius in meters, and *lat* and *long* are the latitude and longitude (in radians) of the two  
263 populations compared. For the *fastsimcoal2* migration rates, we tested for IBD between the  
264 Dune and Headland of each population pair using a linear model in R (R Core Team, 2017),  
265 using an average of the bidirectional gene flow rates for each pair (log-log scale). For  
266 Slatkin's  $\hat{M}$ , we also tested for IBD between the Dune and Headland of each population pair  
267 (log-log scale) using a linear model in R, and tested for IBD within the Dunes, and within the  
268 Headlands (log-log scale) using Mantel tests with 9,999 permutations in R (*mantel* in the  
269 *vegan* package (Blanchet *et al.*, 2018)).

## 270 **Is there gene flow between parapatric populations?**

271 We examined levels of admixture between parapatric populations with *STRUCTURE* v2.3.4  
272 (Pickrell & Pritchard, 2012). *STRUCTURE* is a Bayesian MCMC approach that assigns  
273 populations into genetic clusters ( $K$ ) based on individual genotypes by assuming Hardy-

274 Weinberg Equilibrium within a population. It assigns each individual an admixture  
275 coefficient to depict the proportion of the genome that originated from a particular K cluster.  
276 To increase the numbers of SNPs we took a subset of the data by excluding the two  
277 populations from the west coast of Australia (D09 and D35). Excluding these most divergent  
278 populations decreased the amount of missing data and thus increased the number of common  
279 SNPs in the south-eastern populations. We used the same filtering procedure as above,  
280 filtered for MAF 0.05 and thinned SNPs in *PLINK* to retain one SNP per rad locus. Each  
281 population pair was extracted and subsequently filtered for MAF 0.05. We retained between  
282 837 and 2,606 unlinked SNPs per pair (mean = 1,905 SNPs; SD = 575). *STRUCTURE*  
283 analysis was run using the admixture model and the correlated allele frequency model  
284 (Falush *et al.*, 2003) with 10 independent runs for K = 1-6 (50,000 burn-in and 200,000  
285 MCMC). We ensured convergence of all summary statistics. As we were specifically  
286 interested in detecting admixed individuals between the two ecotypes, we plot results for K =  
287 2. To explore any additional genetic structure within a pair, we also estimated the optimal K-  
288 value with the Evanno method (Evanno *et al.*, 2005), by examining the maximum value for  
289  $\Delta K$  (the second order rate of change in the log probability of data between successive K-  
290 values). The R package *pophelper* was used to calculate the  $\Delta K$ , summarise results and plot  
291 the data.

292 We directly estimated levels of gene flow between population pairs from the site frequency  
293 spectrum (SFS) using the composite-likelihood method implemented in *fastsimcoal2* v2.6.0.3  
294 (Excoffier *et al.*, 2013). The joint SFS of two populations is sensitive to demographic  
295 processes. For instance, gene flow will result in more low-frequency shared polymorphisms  
296 than expected under a non-migration scenario (Hahn, 2018). We tested eight demographic  
297 models (Figure 4A), and inferred migration rates, as well as other demographic parameters  
298 including current population sizes, ancestral population size, divergence time, time of  
299 secondary contact, and gene flow cessation time, for eight Dune-Headland population pairs.  
300 We additionally asked whether gene flow was occurring in a linear fashion down the coast  
301 within each ecotype, by testing eight Dune-Dune and eleven Headland-Headland pairs (Table  
302 S2). To determine the baseline level of gene flow inferred by *fastsimcoal2* between isolated  
303 populations, namely the null gene flow expectation, we estimated migration rates for three  
304 very divergent allopatric populations (>1,500 km apart, between the eastern and south-eastern  
305 clades; D03-D32, D03-H12, and H02-H12), and took the highest detected migration rate  
306 from these allopatric comparisons as the baseline rate.

307 As above, the western Australia populations (D09 and D35) were excluded from this dataset  
308 to increase the number of sampled SNPs. For each pair, we filtered for a minor allele count of  
309 one (MAC1), retaining between 6,679 and 19,951 variable sites per pair (mean = 12,155  
310 SNPs, SD = 3,316). By using a MAC1 and a relatively high number of samples per  
311 population (mean = 57, SD = 15), we retain rare alleles that are informative about migration  
312 events between the populations (Slatkin, 1985b). Since we cannot distinguish ancestral from  
313 derived alleles, we used the minor allele SFS (folded SFS). We used an *ad hoc* approach to  
314 estimate the number of monomorphic sites (see Supplementary Methods). Gene flow  
315 estimates were robust to varying the number of monomorphic sites (data not shown). We  
316 used custom R functions (modified from Liu *et al.*, 2018) to generate the joint folded SFS per  
317 population pair without downsampling.

318 We performed 50 independent *fastsimcoal2* runs per model per population pair. Each run  
319 consisted of 100,000 coalescent simulations and 40 expectation-maximisation cycles for  
320 parameter optimisation. We used a mutation rate of  $1.0 \times 10^{-8}$  based on Asteraceae EST  
321 sequence comparisons and fossil calibrations (Strasburg & Rieseberg, 2008). We ranked the  
322 models based on the Kullback–Leibler information value which was estimated from the AIC  
323 scores of the best run per model. Here, the normalisation of the difference between the AIC  
324 scores of a particular model and the best model in the set provides a measure of the degree of  
325 support for a particular model, namely model likelihood ( $w_i$ ) (Thomé & Carstens, 2016).  
326 Since the use of linked-SNPs might lead to pseudo-replication issues when comparing  
327 models based on *fastsimcoal2* likelihood values (Bagley *et al.*, 2017) and the SFS discards  
328 linkage information, we verified SNPs were largely unlinked by calculating linkage-  
329 disequilibrium in PLINK (data not shown).

330 As *fastsimcoal2* uses simulations to approximate the likelihood values, there is variance in  
331 the likelihood estimates. To test whether the best model significantly differs from alternative  
332 models with negligible gene flow ( $2Nm = 0.01$ ) but the same values at other parameters, we  
333 compared their likelihood distributions based on 100 expected SFS from 100,000 coalescent  
334 simulations per model (Bagley *et al.*, 2017). If likelihood distributions overlap, there is no  
335 significant differences between the fit of both models (Meier *et al.*, 2017). To obtain  
336 confidence intervals for all demographic parameters, we performed parametric bootstrapping.  
337 Given the parameter values of the best run of the best model, we simulated 100 SFS and re-  
338 estimated the parameter values from them. Each run consisted of 100,000 coalescent

339 simulations and 30 expectation-maximisation cycles. The parameter values of the best run of  
340 the best model were specified as initial values of each bootstrapping run. We computed the  
341 95% confidence intervals of all parameters with the *groupwiseMean* function of *rcompanion*  
342 R package (Mangiafico, 2015).

### 343 **Is gene flow high enough to obscure a single origin scenario?**

344 To ask under what conditions gene flow can erode a signal of phylogenetic monophyly of  
345 each ecotype, we ran forward simulations of neutral polymorphism in *SLiM2* (Haller &  
346 Messer, 2017), see Supplementary Methods. *SLiM2* simulates diploid genomes using a  
347 Wright-Fisher model, and tracks derived mutations within simulated genomes. We mimicked  
348 a model of a single-origin scenario, where an ancestral population splits into two populations  
349 (Figure 5A). We can think of this split as an initial single origin of the Dune and Headland  
350 ecotypes. To represent two parapatric population pairs, each of these two ‘ecotypes’ further  
351 splits again and one population of one ecotype exchanges genes with the other ecotype  
352 (representing one parapatric pair at *location 1*, and this also occurs at *location 2* to represent  
353 the other parapatric pair). We varied the following parameters: population size, migration  
354 rate, time from the present to the second split (*T1*), and time from the second split to the split  
355 of the ancestral population (*T2*). In addition, an outgroup population was retained after the  
356 first split, in order to construct a rooted tree (see below). Each model used a heuristic burn-in  
357 period of 10 x N (population size) generations to reach mutation-drift balance in the ancestral  
358 population. After each simulation, 30 individuals per population were sampled and output in  
359 a VCF file.

360 We calculated a distance matrix between individual genotypes and constructed a rooted  
361 neighbour-joining tree within the *ape* R package (Paradis *et al.*, 2004; Popescu *et al.*, 2012).  
362 We calculated the genealogical sorting index (GSI; Cummings *et al.*, 2008), see  
363 Supplementary Methods. GSI is a measure of how monophyletic an arbitrary set of tips are  
364 on a tree. If all the tips form a monophyletic group, GSI will be 1, whereas if the tips are  
365 dispersed throughout the phylogeny, then GSI will be closer to 0. We calculated GSI for four  
366 sets of tips on each tree: for all ‘Dunes’, for all ‘Headlands’, for both populations from  
367 *location 1*, and for both populations from *location 2*. We took the average of the first two,  
368 and the average of the second two, then the log of the ratio of these two GSI values. When  
369 positive, the GSI ratio indicates a false signal of parallel origins, as the populations that are

370 parapatric appear as each other's closest relatives. Conversely, when the GSI ratio is negative,  
371 it indicates that the 'true' signal of the single origin is stronger.

372 We also asked where our observed data fall in the parameter space, and whether the inferred  
373 migration rates between the Dune and Headland of each replicate pair is high enough to  
374 obscure the signal of a single origin. To first estimate which panel of the parameter space the  
375 *S. lautus* system is located, we estimated the internal branch (T1 of Figure 5A) by averaging  
376 the direct estimates of divergence times within ecotypes (calculated from *fastsimcoal2*, see  
377 above for details). We assumed a similar divergence time for the internal branch (T2 of  
378 Figure 5A). We then asked whether our observed D-H migration rates fall within the region  
379 where the phylogeny is not distorted.

380 To further explore the effect of gene flow in phylogenetic distortion, we compared the  
381 relative node order of the observed phylogeny (where the topology is estimated in the  
382 absence of gene flow) to the *fastsimcoal2* models (where gene flow is taken into account).  
383 We did this for four population pairs (D04-H05 and D05-H06; D14-H15 and D32-H12).  
384 Specifically, if the observed phylogeny represents a true parallel origin scenario, then  
385 isolation-with-migration models which jointly estimate gene flow and divergence time should  
386 infer deeper divergence times for populations of the same ecotype, compared to comparisons  
387 between putative sister populations of divergent ecotypes. We used divergence times  
388 estimated in *fastsimcoal2* to compare divergence within and between ecotypes, and asked  
389 whether these estimated divergence times were in accordance with the topology of a  
390 phylogeny.

## 391 **Results**

### 392 **Populations cluster by geography and not by ecology**

393 Phylogenetic inference reveals that neither ecotype forms a monophyletic clade, providing  
394 evidence against a single origin scenario (Figure 2B). Parapatric Dune-Headland populations  
395 are also often sister-taxa, giving evidence for the multiple origin of ecotypes. To visualise the  
396 major genetic structure within *fastSTRUCTURE*, we plotted the lowest K-values that capture  
397 the major structure in the data (Pritchard *et al.*, 2000; Lawson *et al.*, 2018; although the  
398 “best” K-value across all populations was higher – see below). The clustering of populations  
399 into two genetic groups (K=2) revealed a striking correspondence to geography (Figure 2C),

400 where the eastern populations (dark blue) are separated from those populations further south  
401 and to the west (light blue). This strong genetic structuring into two main clades suggests  
402 there are at least two independent origins within the system. When three genetic groups  
403 ( $K=3$ ) are considered, the eastern populations are further separated into two clusters, again  
404 largely corresponding to geography and reflecting the phylogenetic structure of the data;  $K=4$   
405 distinguishes the west Australia populations from those on the south-eastern coast. This  
406 genetic clustering of populations according to their geographic distribution provides further  
407 evidence against a single origin scenario, and is consistent with previous work in this system  
408 (Roda *et al.*, 2013; Melo *et al.*, 2019).

### 409 **Minimal gene flow across the system**

410 In the absence of migration, the *TreeMix* phylogeny explained 95.9% of the data, with the 24  
411 additional migration events augmenting this value to 98.9 % (Figure S1). Figure 3A shows  
412 the first migration event ( $P < 2.2 \times 10^{-308}$ ) with a migration weight ( $w$ ) of 0.40. Although the  
413 24 other migration events were also significant ( $P_{\text{average}} = 2.92 \times 10^{-3}$ ,  $SD = 0.0062$ ), their  
414 individual weightings were small (see Figure S2 for 1-10 migration events), most of them  
415 were not between parapatric pairs, and the addition of these migration events did not  
416 substantially alter the topology from its estimation in the absence of gene flow. Although  
417 these results could suggest a potential complex colonisation history including long distance  
418 yet rare migration events, these P-values should be treated with caution. This is because  
419 model comparisons in *TreeMix* suffers from multiple testing, a large number of parameters,  
420 and the estimated graph can be inaccurate (Pickrell & Pritchard, 2012). We therefore tested  
421 the robustness of this inference using *f<sub>3</sub>-statistics*. All *f<sub>3</sub>-statistics* were positive (Figure S3),  
422 giving no evidence of admixture between any populations. Strong isolation by distance  
423 within each ecotype further supports this contention using  $\hat{M}$  as a proxy for migration rates  
424 (IBD within Dunes: Mantel test,  $r = -0.83$ ,  $P = 0.0001$ ; within Headlands  $r = -0.73$ ,  $P =$   
425  $<0.0001$ ; Figure 3B). A strong IBD trend exists between ecotypes for the eight pairs studied  
426 here ( $\hat{M}$ :  $F_{1,6} = 0.55$ ,  $P = 0.05661$ , multiple  $R^2 = 0.48$ , Figure 3C). Although the same trend  
427 was seen in the migration rate estimates from *fastsimcoal2* it was not statistically significant,  
428 perhaps due to the low sample size (*fastsimcoal2*:  $F_{1,6} = 0.53$ ,  $P = 0.4953$ , multiple  $R^2 = 0.08$ ,  
429 Figure 3B). Overall, this pattern of IBD implies that there is geographically restricted  
430 dispersal within the system and populations are evolving largely independently from one  
431 another.



432 The absence of admixture across the system is also supported by *fastSTRUCTURE* across all  
433 populations. The inferred value of K is close to the number of sampled populations (Figure  
434 S4B) and each population is genetically distinct, suggesting that *S. lautus* has a simple  
435 demographic history with limited admixture (Lawson *et al.*, 2018). Specifically, the K-value  
436 that best explained the structure in the data was 22, the rate of change in the likelihood of  
437 each K-value (Figure S4C) was negligible for K = 24-28, and the K-value that maximised the  
438 marginal likelihood of the data was 28, together suggesting that the optimal K-value is  
439 around 23 (Figure S4A,B). The *fastSTRUCTURE* results for K=23 show that each population  
440 forms a distinct genetic cluster (Figure 3D), suggesting very little, if any, admixture between  
441 them, further implying that each sampled population has been separated from other  
442 populations long enough to be genetically distinct (see pairwise  $F_{ST}$  values in Table S3) and  
443 with insufficient levels of gene flow to homogenise their genomes (Lawson *et al.*, 2018).  
444 Further, when we examine all K-values from 1-23, there is a distinct hierarchical structure  
445 that mirrors the phylogeny suggesting that such structure is an accurate representation of the  
446 history of the populations. The Tasmania population pair (D14-H15) should be treated with  
447 caution due to the smaller sample size ( $n_{\text{mean}} = 11.5$ ) compared to other populations ( $n_{\text{mean}} =$   
448 62). For groups with fewer samples, genetic clustering programs such as *fastSTRUCTURE*  
449 are likely to assign them as mixtures of multiple populations rather than their own distinct  
450 population (Lawson *et al.*, 2018). This is evident for K = 22, where the Tasmania populations  
451 appear admixed (Figure S4A).

#### 452 **Minimal gene flow between parapatric ecotypes and distant populations**

453 We observed very few admixed individuals between the parapatric Dune-Headland  
454 populations at each locality within the *STRUCTURE* analysis for K = 2 (Figure 4B). On  
455 average, 9.36% of individuals were admixed per population, although their admixture  
456 proportions were on average less than 1% (mean = 0.008, SD = 0.018). This suggests that  
457 gene flow between parapatric populations might have stopped back in the past, and lineage  
458 sorting of many alleles has already taken place. For all pairs, the best K-value based on the  
459 Evanno method (Evanno *et al.*, 2005) was K = 2 (Figure S5). Demographic modelling in  
460 *fastsimcoal2* revealed the most likely divergence model for all population pairs within and  
461 between ecotypes was bidirectional gene flow after secondary contact ( $w_i > 0.99$ ; Figure S6).  
462 However, for parapatric Dune-Headland population comparisons, direct measurements of  
463 migration rates revealed that most migration rates were very low ( $2Nm < 1.00$ ), with the

464 exception of D04-H05 and D32-H12 (Figure 3B upper section, 4B; Table S4, S5). For Dune-  
465 Dune population comparisons we also detected very low migration rates ( $2N_{m_{\text{mean}}} = 0.23$ , SD  
466 = 0.09), with all pairs containing  $2Nm < 1.00$ . For Headland-Headland comparisons we again  
467 detected very low migration rates ( $2N_{m_{\text{mean}}} = 0.57$ , SD = 1.01), with all pairs containing  
468  $2Nm < 1.00$ , with the exception of H12-H12A (Figure 3B upper section, 4B; Table S4, S5).  
469 Across all comparisons, all Dune-Dune pairs and most Headland-Headland pairs exhibited  
470 gene flow levels lower than the maximum migration rate of allopatric populations separated  
471 by more than 1,500km (i.e. the null expectation;  $2Nm = 0.39$ ; Figure 3B). Three Dune-  
472 Headland pairs (D00-H00, D03-H02 and D12-H14) were also within this null range.  
473 Alternative models with negligible gene flow did not fit the data better with the exception of  
474 the D03-H02 pair (Figure S7), as previously detected in Melo *et al.*, (2019). Overall, the  
475 observed magnitude of gene flow and previous lines of evidence, make us conclude that most  
476 parapatric Dune-Headland populations in *S. lautus* are effectively allopatric.

#### 477 **Levels of gene flow do not obscure a single origin scenario**

478 Simulation of a single origin scenario with gene flow (Figure 5A) in *SLiM* revealed how gene  
479 flow can erode the true signal of monophyly of each ecotype (true signal = Figure 5B blue  
480 regions, negative GSI ratios) leading to a distorted phylogeny where populations cluster by  
481 geography (distorted signal = Figure 5B red regions, positive GSI ratios). We detected this  
482 phylogenetic shift when  $T1$  was long and  $T2$  was short (Figure 5B top right panel) even for  
483 small amounts of gene flow. In contrast, we did not detect it when  $T1$  was short and  $T2$  was  
484 long (Figure 5B bottom left panel). For intermediate lengths of  $T1$  and  $T2$ , increasing  
485 migration rates lead to an increase in GSI ratios. In general, population size did not  
486 dramatically altered GSI ratios, except when both  $T1$  and  $T2$  were short (Figure 5B, upper left  
487 quadrants). Overall, these patterns suggest that as the speed of diversification increases (from  
488 long to short internal branches,  $T2$ ), even small amounts of gene flow are likely to erode the  
489 true signal of a single origin where populations cluster by ecology and not by geography.  
490 This is because short internal branches are already likely to distort the phylogenetic signal  
491 due to high levels of ancestral polymorphism in each parapatric pair.

492 Our observed data are located in the bottom right panel of Figure 5B: the estimated  
493 divergence time within ecotypes (branch  $T1$  of Figure 5A) ranged between 43,928 and  
494 128,159 generations (mean = 84,559, SD = 22,916), which is closest to  $T1 = 100,000$ , also  
495 assuming a similar time between splitting events between parapatric pairs (branch  $T2$  of

496 Figure 5A). None of our observed bidirectional migration rates (mean  $m = 1.5 \times 10^{-05}$ , range =  
497  $1.7 \times 10^{-06}$  to  $5.2 \times 10^{-05}$ ) fall within the region of the parameter space that would create full  
498 phylogenetic distortion (i.e. darkest red region of Figure 5B, bottom right panel). Most  
499 observed migration rates are low, bidirectional and less than  $1.0 \times 10^{-05}$  (Figure 5C, light grey),  
500 which are in regions of the parameter space that are unlikely to distort a single origin  
501 scenario. Only two population pairs (D04-H05 and D32-H12) had levels of gene flow that  
502 could have partially distorted a single origin scenario (Figure C, dark grey).

503 Divergence time estimations in *fastsimcoal2* (which considers gene flow) were in accordance  
504 with the observed phylogeny: we observed deeper divergence times for populations of the  
505 same ecotype compared to sister-taxa of different ecotypes. More specifically, for D04-H05  
506 and D05-H06, the average divergence time between populations of the same ecotype (i.e.  
507 D04-D05 and H05-H06) was 79,801 (SD = 2,698), whereas the average divergence time  
508 between populations at each locality (i.e. D04-H05 and D05-H06) was 49,317 (SD = 26,319).  
509 This is also true for D14-H15 and D32-H12, where the average divergence time between  
510 populations of the same ecotype (i.e. D14-D32 and H15-H12) was 68,723 (SD = 17,526), and  
511 the average divergence time between populations at each locality (i.e. D14-H15 and D32-  
512 H12) was 43,318 (SD = 6,522). Overall, this gives further evidence that the phylogenetic  
513 topology (estimated in the absence of gene flow) has not resulted from gene flow distortion.

## 514 **Discussion**

515 We have used an array of complementary approaches to disentangle the demographic history  
516 of the coastal *Senecio lautus* ecotypes. In this system, many lines of evidence support a  
517 multiple origin scenario for the parapatric Dune and Headland populations. The demographic  
518 history of this system reveals striking population structure and a strong effect of geography  
519 and restricted dispersal, to the extent that all populations are evolving largely independently  
520 from each other. Together with previous results from transplant experiments, our results  
521 convincingly show that parapatric Dune and Headland populations have evolved multiple  
522 times repeatedly and independently, and that selection and drift, rather than gene flow, play a  
523 predominant role in the distribution of genetic diversity in this system. Below we discuss  
524 these results in light of parallel parapatric divergence in this highly replicated system of  
525 evolution.

## 526 **Strong genetic structure between *Senecio lautus* coastal populations**

527 The dispersal of gametes and seeds within a landscape depends upon the physical distance  
528 they can move and the availability of suitable habitats (Hansson, 1991). Within highly patchy  
529 environments, most gametes and seeds are restricted to disperse locally. Within coastal  
530 populations, where suitable habitats are largely limited, the dispersal kernel of a species  
531 highly restricts gene flow (Nathan *et al.*, 2012). In *S. lautus*, dispersal is governed by  
532 pollinators (including native bees, moths and butterflies) which can transport pollen grains up  
533 to 2 km in a day (White, 2008), and by wind that drives dispersal of seeds with pappi  
534 (Andersen, 1993). Although there is potential for long distance movement within the system  
535 both within and between ecotypes (Roda *et al.*, 2013), strong local adaptation prevents  
536 migrants and hybrids from effectively establishing beyond their local site (Richards & Ortiz-  
537 Barrientos, 2016; Walter *et al.*, 2016). This, coupled with a landscape of patchy environments  
538 along the coast, suggests that population structure in *S. lautus* is expected to be pronounced.  
539 Our findings are in accord with this expectation, and highlight various levels of population  
540 structure and history in the coastal system.

541 Genetic structure within *S. lautus* clusters populations according to their geographic  
542 distribution along the Australian coast, and not by the environment they occupy (Figure 2B,  
543 2C). Within *fastSTRUCTURE*, the largest genetic groups within *S. lautus* encompass two  
544 clades (Figure 2C) which are called the eastern and south-eastern clades. Each clade can be  
545 further subdivided into two subclades (Figure 2C). These four clades are largely independent  
546 of each other, do not have evidence of long-distance gene flow between them (Figure 3A),  
547 and appear to contain multiple repeated instances of parapatric divergence. This genetic  
548 structure, where populations group by geography and not ecology is mirrored in the  
549 phylogeny (Figure 2B), and is consistent with our previous work using targeted sequencing  
550 of neutral genes (Melo *et al.*, 2019) and RADseq using pools of individuals (Roda *et al.*,  
551 2013).

552 A further level of structure can be visualised at the locality (i.e. parapatric Dune-Headland  
553 populations), where each population is unique in this system:  $F_{ST}$  values are above 0.2 in each  
554 population comparison (Table S3), and *fastSTRUCTURE* supports K-values equal to the  
555 same number of populations sampled in this study (Figure 3D). Also, all parapatric pairs are  
556 fully differentiated with little admixture (Figure 4B), even those such as D04-H05 at Coffs  
557 Harbour (NSW) that have adjacent habitats, i.e. where the potential for gene flow between

558 ecotypes is high. Previous ecological experiments in this population pair have demonstrated  
559 strong extrinsic reproductive isolation against migrants and hybrids (Richards *et al.*, 2016;  
560 Richards & Ortiz-Barrientos, 2016), and cline analyses revealed that the barrier to gene flow  
561 is complete (North, 2015). Finally, no single estimate of the  $f_3$ -statistic for any population  
562 triad was negative (Figure S3), further supporting that there are negligible levels of gene flow  
563 between populations across the entire system.

564 There is a strong signal of isolation by distance (Wright, 1943) within each ecotype as well as the  
565 Dune-Headland parapatric pairs, where there is an increase in genetic differentiation between  
566 populations with increasing geographic distance. This pattern arises when populations are  
567 geographically restricted and are at an equilibrium of dispersal and drift. Isolation by distance also  
568 suggests that long distance dispersal within the system is not pervasive, and populations have  
569 colonised their habitats far enough in the past to approach an equilibrium under the current patterns  
570 of dispersal (Slatkin, 1993). Overall, a combination of strong selection and limited dispersal can  
571 explain why parapatric populations persist despite the opportunity for homogenising gene flow  
572 between them. Future ecological studies that directly estimate seed and pollen dispersal kernels will  
573 help clarify the relative contributions of movement and local adaptation to divergence in parapatry.

#### 574 **Parallel evolution of parapatric *S. lautus* ecotypes with minimal levels of gene flow**

575 A common doubt arising in purported cases of parallel evolution is whether gene flow is  
576 responsible for the grouping of populations by geography and not by ecology (Quesada *et al.*,  
577 2007; Johannesson *et al.*, 2010; Bierne *et al.*, 2013; Butlin *et al.*, 2014; Martin *et al.*, 2015;  
578 Rougemont *et al.*, 2015; Le Moan *et al.*, 2016; Meier *et al.*, 2017; Pérez-Pereira *et al.*, 2017;  
579 Trucchi *et al.*, 2017; Rougeux *et al.*, 2019). A single origin scenario combined with high  
580 levels of gene flow can alter the phylogenetic relationships of populations, falsely suggesting  
581 multiple independent origins (Endler, 1977; Barton & Hewitt, 1985; Coyne & Orr, 2004;  
582 Bierne *et al.*, 2013). This is because genetic structure at neutral markers can be decoupled  
583 from colonisation history via introgression and incomplete lineage sorting. This needs careful  
584 scrutiny in our system: there are multiple parapatric divergences that have the potential for  
585 high gene flow due to their close geographic proximity. Surprisingly, we observed minimal  
586 levels of gene flow between parapatric *S. lautus* Dune-Headland pairs, similar levels of gene  
587 flow between parapatric and allopatric population pairs (Figure 3B), as well as linearly down  
588 the coast for populations within each ecotype (Figure 3B, 3C; Table S4, S5). However, two  
589 parapatric population pairs (D04-H05 and D32-H12) had an estimated number of migrants

590 per generation above one (Figure 3B; Table S4, S5). This consistent with population genetic  
591 theory stating that, in the absence of divergent selection, these levels of gene flow would  
592 homogenise them (Slatkin, 1985a), potentially obscuring a single origin scenario. Therefore,  
593 we further addressed this problem by using forward simulations of the neutral divergence  
594 process to ask if the demographic parameters estimated in this study are likely to obscure the  
595 history of colonisation and divergence in *S. lautus*. This simulation approach is conservative  
596 because previous transplant experiments in the system (Melo *et al.*, 2014; Richards *et al.*,  
597 2016; Richards & Ortiz-Barrientos, 2016; Walter *et al.*, 2016, 2018b; a) as well as clinal  
598 analyses (North, 2015), have shown that divergent natural selection is strong and creates  
599 extrinsic reproductive isolation between Dune and Headland populations.

600 In our simulations, we investigated the interaction of gene flow, incomplete lineage sorting,  
601 and drift on phylogenetic distortion. Although it is clear that there are regions in the  
602 parameter space that completely erode the signal of a single origin of ecotypes and falsely  
603 suggest their parallel origins (Figure 5B, red regions), there is also large fraction of the  
604 parameter space that does not (Figure 5B, blue regions). Although our simulations revealed  
605 that even small amounts of gene flow can distort the phylogeny, our observed levels of gene  
606 flow between parapatric Dune-Headland *S. lautus* populations are not high enough to distort  
607 the phylogenetic relationships amongst populations from different ecotypes. Even the two  
608 parapatric pairs (D04-H05 and D32-H12) that experience the most bidirectional gene flow do  
609 not fall within the region of parameter space where complete distortion of the phylogeny  
610 occurs (i.e. darkest red region of Figure 5B, bottom right panel). In addition, these population  
611 pairs are geographically and genetically distant from pairs at other localities, suggesting that  
612 their divergence likely occurred in parapatry. Further evidence that gene flow has not  
613 obscured a single origin scenario in *S. lautus* comes from comparing joint estimates of gene  
614 flow and divergence times (as implemented in isolation with migration models) between  
615 population pairs of the same ecotype and putative sister populations of divergent ecotypes.  
616 We observed that population pairs of the same ecotype and not those from different ecotypes  
617 show deeper divergence times. In addition, constructing the phylogeny taking into account  
618 gene flow did not alter the topology from its estimation in the absence of gene flow (Figure  
619 3A), and parapatric pairs were not better explained by the presence of gene flow. Together,  
620 these results imply that phylogenetic distortion is highly unlikely in *S. lautus* and that such  
621 relationships reflect the true history of populations and ecotypes.



622 Overall, our results indicate that coastal Dune-Headland *S. lautus* populations are highly  
623 replicated, having originated multiple independent times in parapatry with limited levels of  
624 gene flow. Within the system we have high confidence for at least six (and potentially eight)  
625 independent parapatric Dune-Headland divergences. We treat the divergences at two  
626 localities (D04-H05 and D32-H12) with some caution: this is because their estimated number  
627 of migrants per generation is above one (which can lead to population homogenisation;  
628 Slatkin, 1985a), and they also fall within the simulated parameter space where there is some  
629 potential for phylogenetic distortion. Nevertheless, these pairs are from the two separate  
630 clades, and are genetically isolated from other such pairs, so even moderate levels of gene  
631 flow within each of these distant pairs will not substantially distort the phylogeny. In  
632 addition, the estimates of divergence times for these populations (taking into account gene  
633 flow) do not suggest homogenisation after secondary contact has occurred. Therefore, all  
634 eight parapatric divergences sampled within this study appear to have originated  
635 independently, thus evolving in parallel. Furthermore, in comparison to other systems (e.g.,  
636 Le Moan *et al.*, 2016; Meier *et al.*, 2017; Trucchi *et al.*, 2017; Rougeux *et al.*, 2019), our  
637 observed migration rates between ecotypes of each pair are generally lower (*S. lautus* mean  $m$   
638 =  $1.5 \times 10^{-5}$ , range =  $5.3 \times 10^{-5}$  to  $1.7 \times 10^{-6}$ ), yet are most similar to the *Littorina saxatilis*  
639 system (mean  $m \sim 1.0 \times 10^{-6}$ ; Butlin *et al.*, 2014), which is perhaps the clearest example of  
640 parallel evolution in nature.

#### 641 **The limits of inference from parallel evolution**

642 Parallel evolution allows the study of deterministic evolution in multiple ways. It not only  
643 helps us understand whether populations adapting to similar conditions evolve similar  
644 phenotypes, but whether this repeated adaptation is driven by the same or different genetic  
645 mechanisms in replicate populations (Lenormand *et al.*, 2016). Furthermore, in systems  
646 where reproductive isolation has evolved, we can begin to understand the relative  
647 contributions of prezygotic and postzygotic barriers to divergence (Nosil *et al.*, 2002; Rogers  
648 & Bernatchez, 2006; Stankowski, 2013). However, much remains unknown about the tempo  
649 and mode of adaptation and speciation and particularly whether the two processes share a  
650 common genetic basis. As such, studies of parallel evolution can help uncover further “rules  
651 of speciation” (Coyne & Orr, 1989), particularly with regard to the role of natural selection in  
652 creating diversity at different levels of organisation.

653 In coastal *S. lautus* we can start answering these questions. On one hand, our study helps us  
654 better interpret the multiple transplant experiments carried out in this system, and suggests  
655 that we can compare them as replicates of the adaptation and speciation process. For instance,  
656 it is common to four different coastal localities to find selection against migrants and hybrids  
657 in the field (Walter *et al.*, 2016), but very weak intrinsic reproductive isolation in F1 hybrids  
658 (Melo *et al.*, 2014; Richards *et al.*, 2016; Walter *et al.*, 2016), suggesting that parapatric  
659 ecological divergence is a major driver of diversification under natural conditions in the  
660 system. Nonetheless, two different studies have found strong intrinsic reproductive isolation  
661 in F2 hybrids (Richards *et al.*, 2016; Walter *et al.*, 2016), suggesting that genetic  
662 incompatibilities are indeed accumulating and segregating within populations. Polymorphic  
663 genetic incompatibilities have been discovered in many systems now (Scopece *et al.*, 2010;  
664 Cutter, 2012; Larson *et al.*, 2018), and perhaps monkeyflowers best illustrate how they are  
665 contributing to plant speciation (Lowry & Willis, 2010; Oneal *et al.*, 2014; Sweigart &  
666 Flagel, 2015; Zuellig & Sweigart, 2018). Within *S. lautus*, intrinsic reproductive isolation in  
667 F1 hybrids is almost complete between very divergent lineages (between the eastern and  
668 south-eastern clades), but also according to ecology: although Dune populations are  
669 interfertile despite half a million years of divergence, crosses between ecotypes, and crosses  
670 between divergent Headlands are almost fully infertile (Melo *et al.*, 2019). Given that these  
671 clades have independently evolved Dune and Headland forms, we can infer that adaptation to  
672 similar conditions is only concordant for certain habitats but not for others. This variable  
673 level of predictability might relate to the form of selection acting in each environment, or to  
674 the ruggedness of fitness landscapes across geography (Lenormand *et al.*, 2009, 2016;  
675 Salazar-Ciudad & Marín-Riera, 2013; de Visser & Krug, 2014; Blount *et al.*, 2018).

676 A major step forward to make sense of patterns of evolution across multiple replicates of  
677 parapatric divergence would be to isolate the actual genes responsible for adaptation and  
678 speciation, and to model their individual demographic history (Lee & Coop, 2017, 2019).  
679 This could help us better understand if adaptation arises from new mutations or from standing  
680 genetic variation, as well as reveal the nature of parallelism in a given system. For instance,  
681 we could describe parallel evolution in terms of repeated fixation of the same alleles (e.g.,  
682 Colosimo *et al.*, 2005), or fixation of functionally equivalent alleles, as it might be plausible  
683 during polygenic adaptation (Berg & Coop, 2014; Tiffin & Ross-Ibarra, 2014; Yeaman,  
684 2015), or when phenotypes arise from loss-of-function mutations (e.g., Chan *et al.*, 2010).  
685 Furthermore, to understand how patterns of evolution at the genotypic level manifest at the

686 phenotype, studies of parallel evolution should directly link adaptive loci to phenotypic traits  
687 and further demonstrate that the trait(s) itself has been under repeated selection in  
688 independent populations (Storz & Wheat, 2010; Pardo-Diaz *et al.*, 2015; Hoban *et al.*, 2016).  
689 Nonetheless, our study demonstrates that studying neutral loci can uncover patterns of  
690 colonisation and migration that are consistent with parallel evolution, or even reveal alternate  
691 divergence scenarios (e.g., Roesti *et al.*, 2015). Given the strong correlation between coastal  
692 environment and growth habit in *S. lautus* (James *et al.*, 2020) and the results presented here,  
693 studying the genetics of adaptation across this highly replicated system will reveal the mode  
694 and tempo of adaptation and speciation. Our work also implies that previous discoveries in  
695 this system implicating divergence in hormone signalling, flowering, and stress-related  
696 pathways (Wilkinson *et al.*, 2019) are worth studying under the umbrella of parallel evolution  
697 thus helping us better frame divergence at different levels of organisation and development.

698 Finally, in our work we have unusually high power to detect gene flow, as the number of  
699 individuals sequenced in each population is large ( $N_{\text{mean}} = 57$ ,  $2N_{\text{mean}} > 100$  chromosomes per  
700 population). This sampling regime allows me to sample of many rare variants and therefore  
701 better distinguish ancestral polymorphism from migration. Studies undertaking demographic  
702 modelling often sample 10-25 individuals per population (e.g., Roesti *et al.*, 2015; Kautt  
703 *et al.*, 2016; Trucchi *et al.*, 2017) and occasionally even less than 10 (e.g., Meier *et al.*, 2017),  
704 thus cannot easily distinguish shared variants due to gene flow from ancestral polymorphism,  
705 which can make results biased to detecting moderate to high levels of gene flow (Slatkin,  
706 1985b; Hey & Nielsen, 2007; Strasburg & Rieseberg, 2010; Cruickshank & Hahn, 2014). As  
707 our simulations reveal that even small amounts of gene flow can obscure a phylogenetic  
708 topology, studies that fail to detect gene flow with few numbers of individuals should treat  
709 results with caution.

710 Overall, here we provide strong evidence for multiple origins of parapatric Dune and  
711 Headland populations within *S. lautus*. Across this highly replicated system we observed  
712 phylogenetic clustering by geography, with strong genetic structure between populations,  
713 isolation by distance, and surprisingly minimal gene flow between parapatric populations at  
714 each locality as well as the system as a whole. Simulations confirmed that gene flow levels  
715 are not high enough to obscure a single origin scenario. This makes *S. lautus* a highly  
716 replicated system of parapatric divergence and one of the clearest examples of the parallel  
717 evolution of ecotypes discovered yet, adding to the increasing number of potential cases of

718 parallel evolution in plants (Foster *et al.*, 2007; Trucchi *et al.*, 2017; Cai *et al.*, 2019;  
719 Konečná *et al.*, 2019). Our work emphasises that researchers in the field of parallel evolution  
720 should strive to rule out a single origin scenario to demonstrate that populations within a  
721 system have arisen repeatedly and independently.

## 722 **Acknowledgements**

723 We are grateful to M.J. Wilkinson, A. Nguyen Vu and H.L. North for assisting with sample  
724 collection. We thank Ortiz-Barrientos laboratory members for insightful comments on  
725 previous versions of this manuscript. S. Chenoweth and M. Blows provided very useful  
726 feedback on M.E. James' PhD dissertation. This work was funded by The University of  
727 Queensland and the Australian Research Council grants to DO, and by an Australian  
728 Postgraduate Award and a Graduate School International Travel Award to MEJ.

## 729 **Author contributions**

730 MEJ and DO conceived the project. MEJ and JE undertook sample collection. MEJ extracted  
731 DNA, prepared libraries, performed bioinformatics, and undertook the *IQ-Tree*,  
732 *fastSTRUCTURE*, *STRUCTURE* and *TreeMix* analyses. HA conducted the *fastsimcoal2*  
733 analyses. JSG performed the *SLiM* simulations. MEJ and DO wrote the paper with input from  
734 all authors. DO is the mentor and supervisor for the research program.

## 735 **Conflicts of interest**

736 We do not have any conflicts of interest.

## 737 **Data archival**

738 Data will be uploaded to Dryad upon acceptance of the manuscript.

## References

- Ali, S. 1964. *Senecio lautus* complex in Australia. I. Taxonomic considerations and discussion of some of the related taxa from New Zealand. *Australian Journal of Botany* **12**: 282–291.
- Allender, C.J., Seehausen, O., Knight, M.E., Turner, G.F. & Maclean, N. 2003. Divergent selection during speciation of Lake Malawi cichlid fishes inferred from parallel radiations in nuptial coloration. *Proceedings of the National Academy of Sciences* **100**: 14074–14079.
- Andersen, M.C. 1993. Diaspore morphology and seed dispersal in several wind-dispersed Asteraceae. *American Journal of Botany* **80**: 487–492.
- Bagley, R.K., Sousa, V.C., Niemiller, M.L. & Linnen, C.R. 2017. History, geography and host use shape genomewide patterns of genetic variation in the redheaded pine sawfly (*Neodiprion lecontei*). *Molecular Ecology* **26**: 1022–1044.
- Barton, N.H. & Hewitt, G.M. 1985. Analysis of hybrid zones. *Annual Review of Ecology and Systematics* **16**: 113–148.
- Berg, J.J. & Coop, G. 2014. A population genetic signal of polygenic adaptation. *PLoS Genetics* **10**: e1004412.
- Berglund, A.B.N., Dahlgren, S. & Westerbergh, A. 2003. Evidence for parallel evolution and site-specific selection of serpentine tolerance in *Cerastium alpinum* during the colonization of Scandinavia. *New Phytologist* **161**: 199–209.
- Bierne, N., Gagnaire, P.A. & David, P. 2013. The geography of introgression in a patchy environment and the thorn in the side of ecological speciation. *Current Zoology* **59**: 72–86.
- Blanchet, G., Friendly, M., Kindt, R., Legendre, P., McGlenn, D., Minchin, P.R., *et al.* 2018. *vegan: Community Ecology Package*. R package version 2.5-2. <https://CRAN.R-project.org/package=vegan>.
- Blount, Z.D., Lenski, R.E. & Losos, J.B. 2018. Contingency and determinism in evolution: Replaying life's tape. *Science* **362**: eaam5979.
- Broad Institute. 2019. *PicardTools*. Broad Institute, GitHub Repository. <http://broadinstitute.github.io/picard/>.
- Butlin, R.K., Saura, M., Charrier, G., Jackson, B., André, C., Caballero, A., *et al.* 2014. Parallel evolution of local adaptation and reproductive isolation in the face of gene flow. *Evolution* **68**: 935–949.
- Cai, Z., Zhou, L., Ren, N.N., Xu, X., Liu, R., Huang, L., *et al.* 2019. Parallel speciation of wild rice associated with habitat shifts. *Molecular Biology and Evolution* **36**: 875–889.

- Chan, Y.F., Marks, M.E., Jones, F.C., Villarreal, G., Shapiro, M.D., Brady, S.D., *et al.* 2010. Adaptive evolution of pelvic reduction in sticklebacks by recurrent deletion of a Pitx1 enhancer. *Science* **327**: 302–305.
- Clarke, J.D. 2009. Cetyltrimethyl Ammonium Bromide (CTAB) DNA miniprep for plant DNA isolation. *Cold Spring Harbor Protocols* **2009**: Pdb.prot5177.
- Colosimo, P.F., Hosemann, K.E., Balabhadra, S., Villarreal, G., Dickson, M., Grimwood, J., *et al.* 2005. Widespread parallel evolution in sticklebacks by repeated fixation of Ectodysplasin alleles. *Science* **307**: 1928–1933.
- Coyne, J.A. & Orr, H.A. 2004. *Speciation*. Sunderland, MA: Sinauer Associates.
- Coyne, J.A. & Orr, H.A. 1989. Two rules of speciation. In: *Speciation and its consequences*. Sunderland, MA: Sinauer Associates.
- Cruickshank, T.E. & Hahn, M.W. 2014. Reanalysis suggests that genomic islands of speciation are due to reduced diversity, not reduced gene flow. *Mol Ecol* **23**: 3133–3157.
- Cummings, M.P., Neel, M.C. & Shaw, K.L. 2008. A genealogical approach to quantifying lineage divergence. *Evolution* **62**: 2411–2422.
- Cutter, A.D. 2012. The polymorphic prelude to Bateson–Dobzhansky–Muller incompatibilities. *Trends in Ecology & Evolution* **27**: 209–218.
- Danecek, P., Auton, A., Abecasis, G., Albers, C.A., Banks, E., DePristo, M.A., *et al.* 2011. The variant call format and VCFtools. *Bioinformatics* **27**: 2156–2158.
- de Visser, J.A.G.M. & Krug, J. 2014. Empirical fitness landscapes and the predictability of evolution. *Nature Reviews Genetics* **15**: 480–490.
- Elmer, K.R., Kusche, H., Lehtonen, T.K. & Meyer, A. 2010. Local variation and parallel evolution: morphological and genetic diversity across a species complex of neotropical crater lake cichlid fishes. *Philosophical Transactions of the Royal Society B: Biological Sciences* **365**: 1763–1782.
- Endler, J. 1977. *Geographic variation, speciation, and clines*. Princeton, NJ: Princeton University Press.
- Evanno, G., Regnaut, S. & Goudet, J. 2005. Detecting the number of clusters of individuals using the software structure: a simulation study. *Molecular Ecology* **14**: 2611–2620.
- Excoffier, L., Dupanloup, I., Huerta-Sánchez, E., Sousa, V.C. & Foll, M. 2013. Robust demographic inference from genomic and SNP data. *PLoS Genetics* **9**: e1003905.
- Faircloth, B. & Glenn, T. 2011. *Serapure*.  
[https://ethanomics.files.wordpress.com/2012/08/serapure\\_v2-2.pdf](https://ethanomics.files.wordpress.com/2012/08/serapure_v2-2.pdf).
- Falush, D., Stephens, M. & Pritchard, J.K. 2003. Inference of population structure using multilocus genotype data: linked loci and correlated allele frequencies. *Genetics* **164**: 1567–1587.



- Foster, S.A., McKinnon, G.E., Steane, D.A., Potts, B.M. & Vaillancourt, R.E. 2007. Parallel evolution of dwarf ecotypes in the forest tree *Eucalyptus globulus*. *New Phytologist* **175**: 370–380.
- Francis, R.M. 2017. POPHELPER: an R package and web app to analyse and visualize population structure. *Molecular Ecology Resources* **17**: 27–32.
- Garrison, E. 2016. *Vcflib, a simple C++ library for parsing and manipulating VCF files*. <https://github.com/vcflib/vcflib>.
- Garrison, E. & Marth, G. 2012. Haplotype-based variant detection from short-read sequencing. arXiv. arXiv:1207.3907v2 [q-bio.GN].
- Guindon, S., Dufayard, J.F., Lefort, V., Anisimova, M., Hordijk, W. & Gascuel, O. 2010. New algorithms and methods to estimate maximum-likelihood phylogenies: Assessing the performance of PhyML 3.0. *Systematic Biology* **59**: 307–321.
- Hahn, M.W. 2018. *Molecular population genetics*. Sunderland, MA: Sinauer Associates.
- Haller, B.C. & Messer, P.W. 2017. SLiM 2: Flexible, interactive forward genetic simulations. *Molecular Biology and Evolution* **34**: 230–240.
- Hansson, L. 1991. Dispersal and connectivity in metapopulations. *Biological Journal of the Linnean Society* **42**: 89–103.
- Herman, A., Brandvain, Y., Weagley, J., Jeffery, W.R., Keene, A.C., Kono, T.J.Y., *et al.* 2018. The role of gene flow in rapid and repeated evolution of cave-related traits in Mexican tetra, *Astyanax mexicanus*. *Molecular Ecology* **27**: 4397–4416.
- Hey, J. & Nielsen, R. 2007. Integration within the Felsenstein equation for improved Markov chain Monte Carlo methods in population genetics. *Proceedings of the National Academy of Sciences* **104**: 2785–2790.
- Hoang, D.T., Chernomor, O., von Haeseler, A., Minh, B.Q. & Vinh, L.S. 2018. UFBoot2: Improving the ultrafast bootstrap approximation. *Molecular Biology and Evolution* **35**: 518–522.
- Hoban, S., Kelley, J.L., Lotterhos, K.E., Antolin, M.F., Bradburd, G., Lowry, D.B., *et al.* 2016. Finding the genomic basis of local adaptation: pitfalls, practical solutions, and future directions. *The American Naturalist* **188**: 379–397.
- James, M.E., Wilkinson, M.J., North, H.L., Engelstädter, J. & Ortiz-Barrientos, D. 2020. A framework to quantify phenotypic and genotypic parallel evolution. BioRxiv [Preprint].
- Johannesson, K., Panova, M., Kempainen, P., André, C., Rolán-Alvarez, E. & Butlin, R.K. 2010. Repeated evolution of reproductive isolation in a marine snail: unveiling mechanisms of speciation. *Philosophical Transactions of the Royal Society B: Biological Sciences* **365**: 1735–1747.

- Kalyaanamoorthy, S., Minh, B.Q., Wong, T.K.F., von Haeseler, A. & Jermiin, L.S. 2017. ModelFinder: fast model selection for accurate phylogenetic estimates. *Nature Methods* **14**: 587–589.
- Kautt, A.F., Machado-Schiaffino, G. & Meyer, A. 2016. Multispecies outcomes of sympatric speciation after admixture with the source population in two radiations of Nicaraguan crater lake cichlids. *PLoS Genet* **12**: e1006157.
- Konečná, V., Nowak, M.D. & Kolář, F. 2019. Parallel colonization of subalpine habitats in the central European mountains by *Primula elatior*. *Scientific Reports* **9**: 3294.
- Larson, E.L., Vanderpool, D., Sarver, B.A.J., Callahan, C., Keeble, S., Provencio, L.P., *et al.* 2018. The evolution of polymorphic hybrid incompatibilities in house mice. *Genetics* **209**: 845–859.
- Lawson, D.J., van Dorp, L. & Falush, D. 2018. A tutorial on how not to over-interpret STRUCTURE and ADMIXTURE bar plots. *Nature Communications* **9**: 3258.
- Le Moan, A., Gagnaire, P.A. & Bonhomme, F. 2016. Parallel genetic divergence among coastal-marine ecotype pairs of European anchovy explained by differential introgression after secondary contact. *Molecular Ecology* **25**: 3187–3202.
- Lee, K.M. & Coop, G. 2017. Distinguishing among modes of convergent adaptation using population genomic data. *Genetics* **207**: 1591–1619.
- Lee, K.M. & Coop, G. 2019. Population genomics perspectives on convergent adaptation. *Philosophical Transactions of the Royal Society B: Biological Sciences* **374**: 20180236.
- Lenormand, T., Chevin, L.M. & Bataillon, T. 2016. Parallel evolution: what does it (not) tell us and why is it (still) interesting? In: *Chance in Evolution*. Chicago, USA: University Chicago Press.
- Lenormand, T., Roze, D. & Rousset, F. 2009. Stochasticity in evolution. *Trends in Ecology & Evolution* **24**: 157–165.
- Li, H. 2013. Aligning sequence reads, clone sequences and assembly contigs with BWA-MEM. arXiv:1303.3997 [q-bio.GN].
- Li, H. & Durbin, R. 2009. Fast and accurate short read alignment with Burrows-Wheeler transform. *Bioinformatics* **25**: 1754–1760.
- Li, H., Handsaker, B., Wysoker, A., Fennell, T., Ruan, J., Homer, N., *et al.* 2009. The Sequence Alignment/Map format and SAMtools. *Bioinformatics* **25**: 2078–2079.
- Liu, S., Ferchaud, A.L., Grønkaer, P., Nygaard, R. & Hansen, M.M. 2018. Genomic parallelism and lack thereof in contrasting systems of three-spined sticklebacks. *Molecular Ecology* **27**: 4725–4743.
- Lowry, D.B. & Willis, J.H. 2010. A widespread chromosomal inversion polymorphism contributes to a major life-history transition, local adaptation, and reproductive isolation. *PLoS Biology* **8**: e1000500.

- Magalhaes, I.S., Whiting, J.R., D'Agostino, D., Hohenlohe, P.A., Mahmud, M., Bell, M.A., *et al.* 2019. Intercontinental genomic parallelism in multiple adaptive radiations. *BioRxiv* [Preprint]. <https://dx.doi.org/10.1101/856344>.
- Mangiafico, S., S. 2015. *An R companion for the handbook of biological statistics*. <https://rcompanion.org/rcompanion/>.
- Martin, C.H., Cutler, J.S., Friel, J.P., Dening Touokong, C., Coop, G. & Wainwright, P.C. 2015. Complex histories of repeated gene flow in Cameroon crater lake cichlids cast doubt on one of the clearest examples of sympatric speciation. *Evolution* **69**: 1406–1422.
- Meier, J.I., Sousa, V.C., Marques, D.A., Selz, O.M., Wagner, C.E., Excoffier, L., *et al.* 2017. Demographic modelling with whole-genome data reveals parallel origin of similar *Pundamilia* cichlid species after hybridization. *Molecular Ecology* **26**: 123–141.
- Melo, M.C., Grealy, A., Brittain, B., Walter, G.M. & Ortiz-Barrientos, D. 2014. Strong extrinsic reproductive isolation between parapatric populations of an Australian groundsel. *New Phytologist* **203**: 323–334.
- Melo, M.C., James, M.E., Roda, F., Bernal-Franco, D., Wilkinson, M.J., Liu, H., *et al.* 2019. Evidence for mutation-order speciation in an Australian wildflower. *BioRxiv* [Preprint]. doi: <https://doi.org/10.1101/692673>.
- Nathan, R., Klein, E., Robledo-Arnuncio, J.J. & Revilla, E. 2012. Dispersal kernels: review. In: *Dispersal ecology and evolution*. Oxford, UK: Oxford University Press.
- Nguyen, L.T., Schmidt, H.A., von Haeseler, A. & Minh, B.Q. 2015. IQ-TREE: A fast and effective stochastic algorithm for estimating maximum-likelihood phylogenies. *Molecular Biology and Evolution* **32**: 268–274.
- North, H.L. 2015. Divergent selection maintains parapatric ecotypes in effective panmixia. Honours Thesis. The University of Queensland.
- Nosil, P., Crespi, B.J. & Sandoval, C.P. 2002. Host-plant adaptation drives the parallel evolution of reproductive isolation. *Nature* **417**: 440–443.
- O'Leary, S.J., Puritz, J.B., Willis, S.C., Hollenbeck, C.M. & Portnoy, D.S. 2018. These aren't the loci you're looking for: Principles of effective SNP filtering for molecular ecologists. *Molecular Ecology* **27**: 3193–3206.
- Oneal, E., Lowry, D.B., Wright, K.M., Zhu, Z. & Willis, J.H. 2014. Divergent population structure and climate associations of a chromosomal inversion polymorphism across the *Mimulus guttatus* species complex. *Molecular Ecology* **23**: 2844–2860.
- Orr, H.A. 2005. The probability of parallel evolution. *Evolution* **59**: 216–220.
- Ostevik, K.L., Moyers, B.T., Owens, G.L. & Rieseberg, L.H. 2012. Parallel ecological speciation in plants? *International Journal of Ecology* **2012**: 1–17.
- Paradis, E., Claude, J. & Strimmer, K. 2004. APE: Analyses of phylogenetics and evolution in R language. *Bioinformatics* **20**: 289–290.

- Pardo-Diaz, C., Salazar, C. & Jiggins, C.D. 2015. Towards the identification of the loci of adaptive evolution. *Methods in Ecology and Evolution* **6**: 445–464.
- Pérez-Pereira, N., Quesada, H. & Caballero, A. 2017. Can parallel ecological speciation be detected with phylogenetic analyses? *Molecular Phylogenetics and Evolution* **116**: 149–156.
- Perreault-Payette, A., Muir, A.M., Goetz, F., Perrier, C., Normandeau, E., Sirois, P., *et al.* 2017. Investigating the extent of parallelism in morphological and genomic divergence among lake trout ecotypes in Lake Superior. *Molecular Ecology* **26**: 1477–1497.
- Pickrell, J.K. & Pritchard, J.K. 2012. Inference of population splits and mixtures from genome-wide allele frequency data. *PLoS Genetics* **8**: e1002967.
- Poland, J.A., Brown, P.J., Sorrells, M.E. & Jannink, J.L. 2012. Development of high-density genetic maps for barley and wheat using a novel two-enzyme Genotyping-by-Sequencing approach. *PLoS ONE* **7**: e32253.
- Popescu, A.A., Huber, K.T. & Paradis, E. 2012. ape 3.0: New tools for distance-based phylogenetics and evolutionary analysis in R. *Bioinformatics* **28**: 1536–1537.
- Pritchard, J.K., Stephens, M. & Donnelly, P. 2000. Inference of population structure using multilocus genotype data. *Genetics* **155**: 945–959.
- Purcell, S., Neale, B., Todd-Brown, K., Thomas, L., Ferreira, M.A.R., Bender, D., *et al.* 2007. PLINK: A tool set for whole-genome association and population-based linkage analyses. *The American Journal of Human Genetics* **81**: 559–575.
- Puritz, J.B., Hollenbeck, C.M. & Gold, J.R. 2014a. *dDocent*: a RADseq, variant-calling pipeline designed for population genomics of non-model organisms. *PeerJ* **2**: e431.
- Puritz, J.B., Matz, M.V., Toonen, R.J., Weber, J.N., Bolnick, D.I. & Bird, C.E. 2014b. Demystifying the RAD fad. *Molecular Ecology* **23**: 5937–5942.
- Quesada, H., Posada, D., Caballero, A., Morán, P. & Rolán-Alvarez, E. 2007. Phylogenetic evidence for multiple sympatric ecological diversification in a marine snail. *Evolution* **61**: 1600–1612.
- R Core Team. 2017. *R: A language and environment for statistical computing*. R Foundation for Statistical Computing. Vienna, Austria. <https://www.R-project.org/>.
- Radford, I.J., Cousens, R.D. & Michael, P.W. 2004. Morphological and genetic variation in the *Senecio pinnatifolius* complex: are variants worthy of taxonomic recognition? *Australian Systematic Botany* **17**: 29–48.
- Raj, A., Stephens, M. & Pritchard, J.K. 2014. fastSTRUCTURE: Variational inference of population structure in large SNP data sets. *Genetics* **197**: 573–589.
- Ravinet, M., Prodöhl, P.A. & Harrod, C. 2013. Parallel and nonparallel ecological, morphological and genetic divergence in lake-stream stickleback from a single catchment. *Journal of Evolutionary Biology* **26**: 186–204.

- Reich, D., Thangaraj, K., Patterson, N., Price, A.L. & Singh, L. 2009. Reconstructing Indian population history. *Nature* **461**: 489–494.
- Richards, T.J. & Ortiz-Barrientos, D. 2016. Immigrant inviability produces a strong barrier to gene flow between parapatric ecotypes of *Senecio lautus*. *Evolution* **70**: 1239–1248.
- Richards, T.J., Walter, G.M., McGuigan, K. & Ortiz-Barrientos, D. 2016. Divergent natural selection drives the evolution of reproductive isolation in an Australian wildflower. *Evolution* **70**: 1993–2003.
- Roda, F., Ambrose, L., Walter, G.M., Liu, H.L., Schaul, A., Lowe, A., *et al.* 2013. Genomic evidence for the parallel evolution of coastal forms in the *Senecio lautus* complex. *Molecular Ecology* **22**: 2941–2952.
- Roesti, M., Kueng, B., Moser, D. & Berner, D. 2015. The genomics of ecological vicariance in threespine stickleback fish. *Nat Commun* **6**: 8767.
- Rogers, S.M. & Bernatchez, L. 2006. The genetic basis of intrinsic and extrinsic post-zygotic reproductive isolation jointly promoting speciation in the lake whitefish species complex (*Coregonus clupeaformis*). *Journal of Evolutionary Biology* **19**: 1979–1994.
- Rohland, N. & Reich, D. 2012. Cost-effective, high-throughput DNA sequencing libraries for multiplexed target capture. *Genome Research* **22**: 939–946.
- Rosenblum, E.B., Parent, C.E. & Brandt, E.E. 2014. The molecular basis of phenotypic convergence. *Annual Review of Ecology, Evolution, and Systematics* **45**: 203–226.
- Rougemont, Q., Gaigher, A., Lasne, E., Côte, J., Coke, M., Besnard, A.L., *et al.* 2015. Low reproductive isolation and highly variable levels of gene flow reveal limited progress towards speciation between European river and brook lampreys. *Journal of Evolutionary Biology* **28**: 2248–2263.
- Rougeux, C., Bernatchez, L. & Gagnaire, P.A. 2017. Modeling the multiple facets of speciation-with-gene-flow toward Inferring the divergence history of lake whitefish species pairs (*Coregonus clupeaformis*). *Genome Biology and Evolution* **9**: 2057–2074.
- Rougeux, C., Gagnaire, P.A. & Bernatchez, L. 2019. Model-based demographic inference of introgression history in European whitefish species pairs'. *Journal of Evolutionary Biology* **32**: 806–817.
- Salazar-Ciudad, I. & Marín-Riera, M. 2013. Adaptive dynamics under development-based genotype–phenotype maps. *Nature* **497**: 361–364.
- Schluter, D. & Nagel, L.M. 1995. Parallel speciation by natural selection. *The American Naturalist* **146**: 292–301.
- Schmieder, R., Lim, Y.W., Rohwer, F. & Edwards, R. 2010. TagCleaner: Identification and removal of tag sequences from genomic and metagenomic datasets. *BMC Bioinformatics* **11**: 341.



- Schrempf, D., Minh, B.Q., De Maio, N., von Haeseler, A. & Kosiol, C. 2016. Reversible polymorphism-aware phylogenetic models and their application to tree inference. *Journal of Theoretical Biology* **407**: 362–370.
- Scopece, G., Lexer, C., Widmer, A. & Cozzolino, S. 2010. Polymorphism of postmating reproductive isolation within plant species. *TAXON* **59**: 1367–1374.
- Slatkin, M. 1985a. Gene flow in natural populations. *Annual Review of Ecology and Systematics* **16**: 393–430.
- Slatkin, M. 1993. Isolation by distance in equilibrium and non-equilibrium populations. *Evolution* **47**: 264–279.
- Slatkin, M. 1985b. Rare alleles as indicators of gene flow. *Evolution* **39**: 53–65.
- Smith, S.D. & Rausher, M.D. 2011. Gene loss and parallel evolution contribute to species difference in flower color. *Molecular Biology and Evolution* **28**: 2799–2810.
- Stankowski, S. 2013. Ecological speciation in an island snail: evidence for the parallel evolution of a novel ecotype and maintenance by ecologically dependent postzygotic isolation. *Molecular Ecology* **22**: 2726–2741.
- Stern, D.L. & Orgogozo, V. 2009. Is genetic evolution predictable? *Science* **323**: 746–751.
- Stoltzfus, A. & McCandlish, D.M. 2017. Mutational biases influence parallel adaptation. *Molecular Biology and Evolution* **34**: 2163–2172.
- Storz, J.F. & Wheat, C.W. 2010. Integrating evolutionary and functional approaches to infer adaptation at specific loci. *Evolution* **64**: 2489–2509.
- Strasburg, J.L. & Rieseberg, L.H. 2010. How robust are “Isolation with Migration” analyses to violations of the IM model? A simulation study. *Molecular Biology and Evolution* **27**: 297–310.
- Strasburg, J.L. & Rieseberg, L.H. 2008. Molecular demographic history of the annual sunflowers *Helianthus annuus* and *H. petiolaris*-large effective population sizes and rates of long-term gene flow. *Evolution* **62**: 1936–1950.
- Sweigart, A.L. & Flagel, L.E. 2015. Evidence of natural selection acting on a polymorphic hybrid incompatibility locus in *Mimulus*. *Genetics* **199**: 543–554.
- Tan, A., Abecasis, G.R. & Kang, H.M. 2015. Unified representation of genetic variants. *Bioinformatics* **31**: 2202–2204.
- Thomé, M.T.C. & Carstens, B.C. 2016. Phylogeographic model selection leads to insight into the evolutionary history of four-eyed frogs. *Proceedings of the National Academy of Sciences* **113**: 8010–8017.
- Thompson, I.R. 2005. Taxonomic studies of Australian *Senecio* (Asteraceae): 5. The *S. pinnatifolius*/*S. lautus* complex. *Muelleria* 23–76.



- Tiffin, P. & Ross-Ibarra, J. 2014. Advances and limits of using population genetics to understand local adaptation. *Trends in Ecology & Evolution* **29**: 673–680.
- Trucchi, E., Frajman, B., Haverkamp, T.H.A., Schönswetter, P. & Paun, O. 2017. Genomic analyses suggest parallel ecological divergence in *Heliosperma pusillum* (Caryophyllaceae). *New Phytologist* **216**: 267–278.
- Walter, G.M., Aguirre, J.D., Blows, M.W. & Ortiz-Barrientos, D. 2018a. Evolution of genetic variance during adaptive radiation. *The American Naturalist* **191**: E108–E128.
- Walter, G.M., Wilkinson, M.J., Aguirre, J.D., Blows, M.W. & Ortiz-Barrientos, D. 2018b. Environmentally induced development costs underlie fitness tradeoffs. *Ecology* **99**: 1391–1401.
- Walter, G.M., Wilkinson, M.J., James, M.E., Richards, T.J., Aguirre, J.D. & Ortiz-Barrientos, D. 2016. Diversification across a heterogeneous landscape. *Evolution* **70**: 1979–1992.
- White, E. 2008. Indirect interactions between alien and native *Senecio* species as mediated by insects. PhD Thesis. Queensland University of Technology.
- Wilkinson, M.J. 2019. The genetic basis of adaptive evolution and divergence in an Australian wildflower. PhD Thesis. The University of Queensland.
- Wilkinson, M.J., Roda, F., Walter, G.M., James, M.E., Nipper, R., Walsh, J., *et al.* 2019. Divergence in hormone signalling links local adaptation and hybrid failure. BioRxiv [Preprint]. <https://doi.org/10.1101/845354>.
- Wright, S. 1943. Isolation by distance. *Genetics* **28**: 114–138.
- Yeaman, S. 2015. Local adaptation by alleles of small effect. *The American Naturalist* **186**: S74–S89.
- Yeaman, S., Gerstein, A.C., Hodgins, K.A. & Whitlock, M.C. 2018. Quantifying how constraints limit the diversity of viable routes to adaptation. *PLOS Genetics* **14**: e1007717.
- York, R.A. & Fernald, R.D. 2017. The repeated evolution of behavior. *Frontiers in Ecology and Evolution* **4**: 143.
- Zuellig, M.P. & Sweigart, A.L. 2018. A two-locus hybrid incompatibility is widespread, polymorphic, and active in natural populations of *Mimulus*. *Evolution* **72**: 2394–2405.

## Figures

### Figure 1. The colonisation history and phylogenetic topology for alternate origin scenarios

Schematic diagram representing the colonisation history and phylogenetic topology of two ecotypes (dark green and light green) from an ancestral population (grey) for three origin scenarios. Solid arrows depict the sequence of colonisation. Double headed dotted arrows represent gene flow ( $m$ ) between the ecotypes within each locality. L1, L2 and L3 represent three geographically distant localities, where a population of each ecotype resides. **(A)** Within a single origin scenario, the two ecotypes arise once from the ancestor, followed by range expansion. In the absence of gene flow, ecotypes form monophyletic clades within the phylogeny. **(B)** The single origin with gene flow scenario involves gene flow upon secondary contact between the ecotypes within each locality. Here, the observed phylogenetic topology shows populations clustering according to their geographic distribution. **(C)** Within a multiple origin scenario, the ancestral (dark green) ecotype arises once from the ancestor followed by range expansion, with the derived (light green) populations independently arising from each orange population. Populations phylogenetically cluster according to their geographic distribution, which can be indistinguishable from a single origin with gene flow scenario **(B)**.

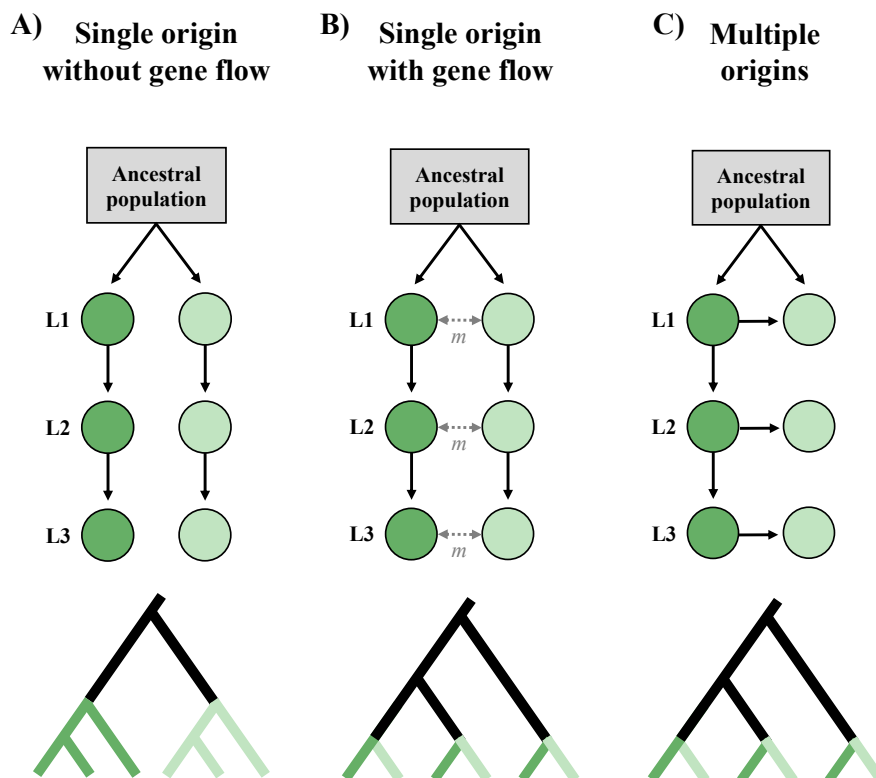

**Figure 2. Sampling locations and genetic clustering of *Senecio lautus* populations**

(A) Sampling locations of the 23 Dune (orange) and Headland (green) *Senecio lautus* populations along the coast of Australia. (B) Maximum likelihood phylogeny of Dune and Headland populations implemented in IQ-TREE. Numbers on each node represent the SH-aLRT support (%), followed by the ultrafast bootstrap support (%). (C) Bayesian assignment of individuals to genetic clusters within *fastSTRUCTURE* for K=2-4. Each of the 1,319 individuals is depicted as a bar, with colours representing ancestry proportions to each cluster. Populations are ordered according to their geographic distribution along the coast.

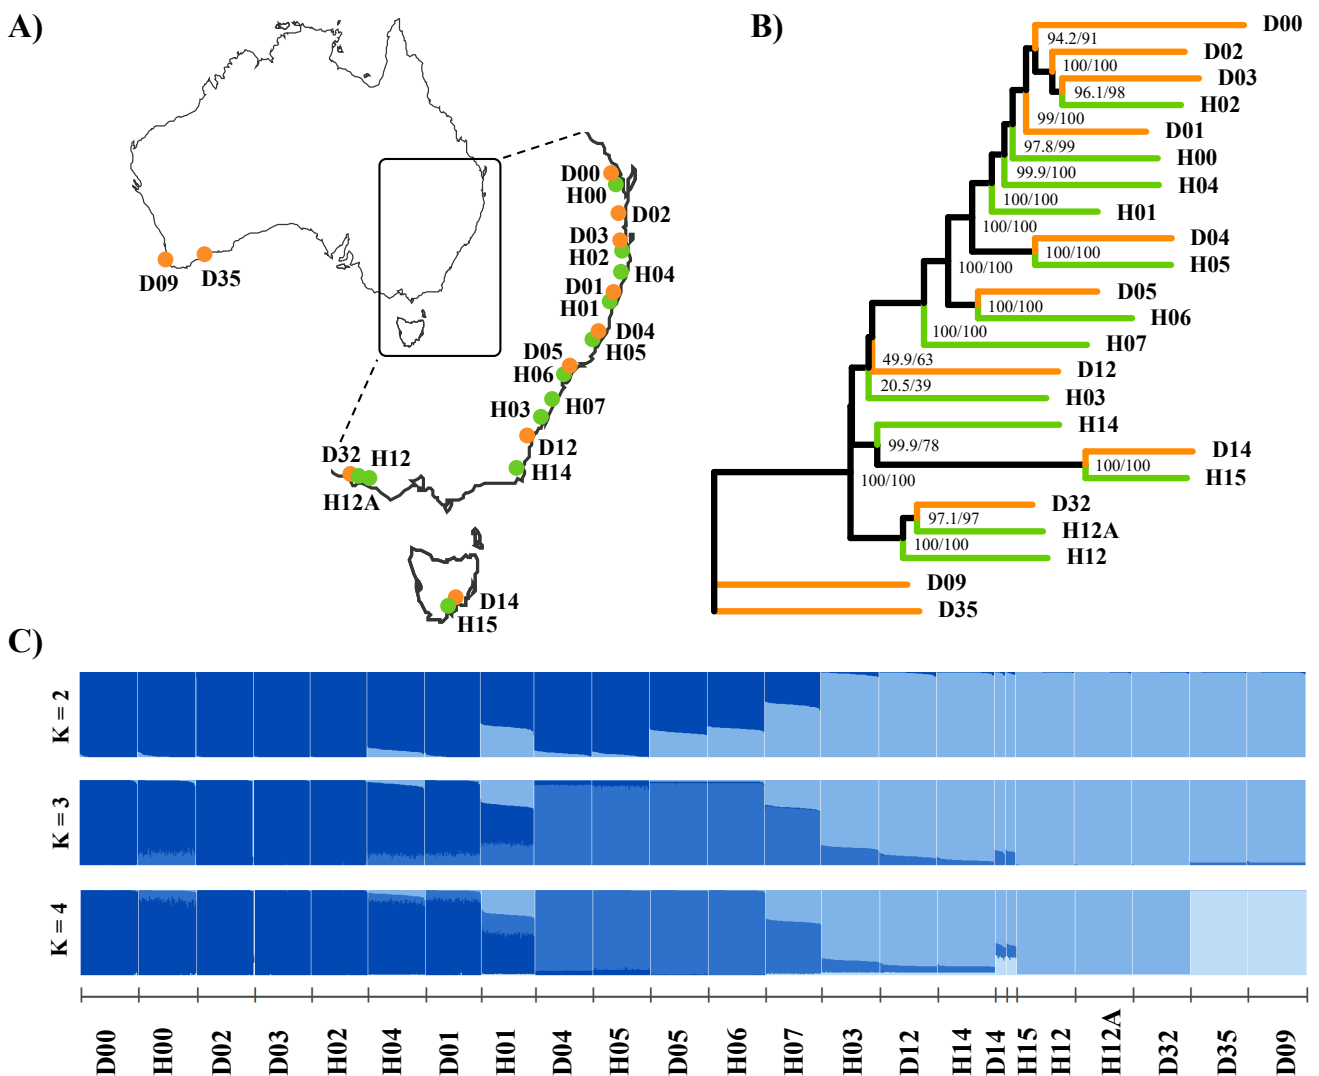

### Figure 3. Patterns of long-distance gene flow, IBD, and genetic clustering

**(A)** Maximum likelihood tree with one migration event inferred in *TreeMix*, the x-axis representing genetic drift. The arrow represents the migration event ( $w = 0.40$ ,  $P < 2.2 \times 10^{-308}$ ). **(B)** Patterns of isolation by distance across Dune and Headland populations for Dune-Headland pairs (black), Dune-Dune (orange) and Headland-Headland (green). Average migration rate is the mean bidirectional migration for each pair. Grey shading represents the null model for migration rates, inferred from the maximum migration value from three allopatric comparisons. Grey horizontal dashed line represents migration ( $2Nm$ ) of one. Pairs falling above this line are labelled. Black dashed line represents the linear model for the DH comparisons. **(C)** Relationship between geographic distance and divergence time for parapatric Dune-Headland pairs (black), Dune-Dune (orange) and Headland-Headland (green). Black, orange and green dashed line represent the linear model for the DH, DD and HH comparisons respectively. **(D)** Bayesian assignment of individuals to genetic clusters within *fastSTRUCTURE* for  $K=23$ . Each of the 1,319 individuals is depicted as a bar, with colours representing ancestry proportions to each cluster. Populations are ordered according to their geographic distribution along the coast.

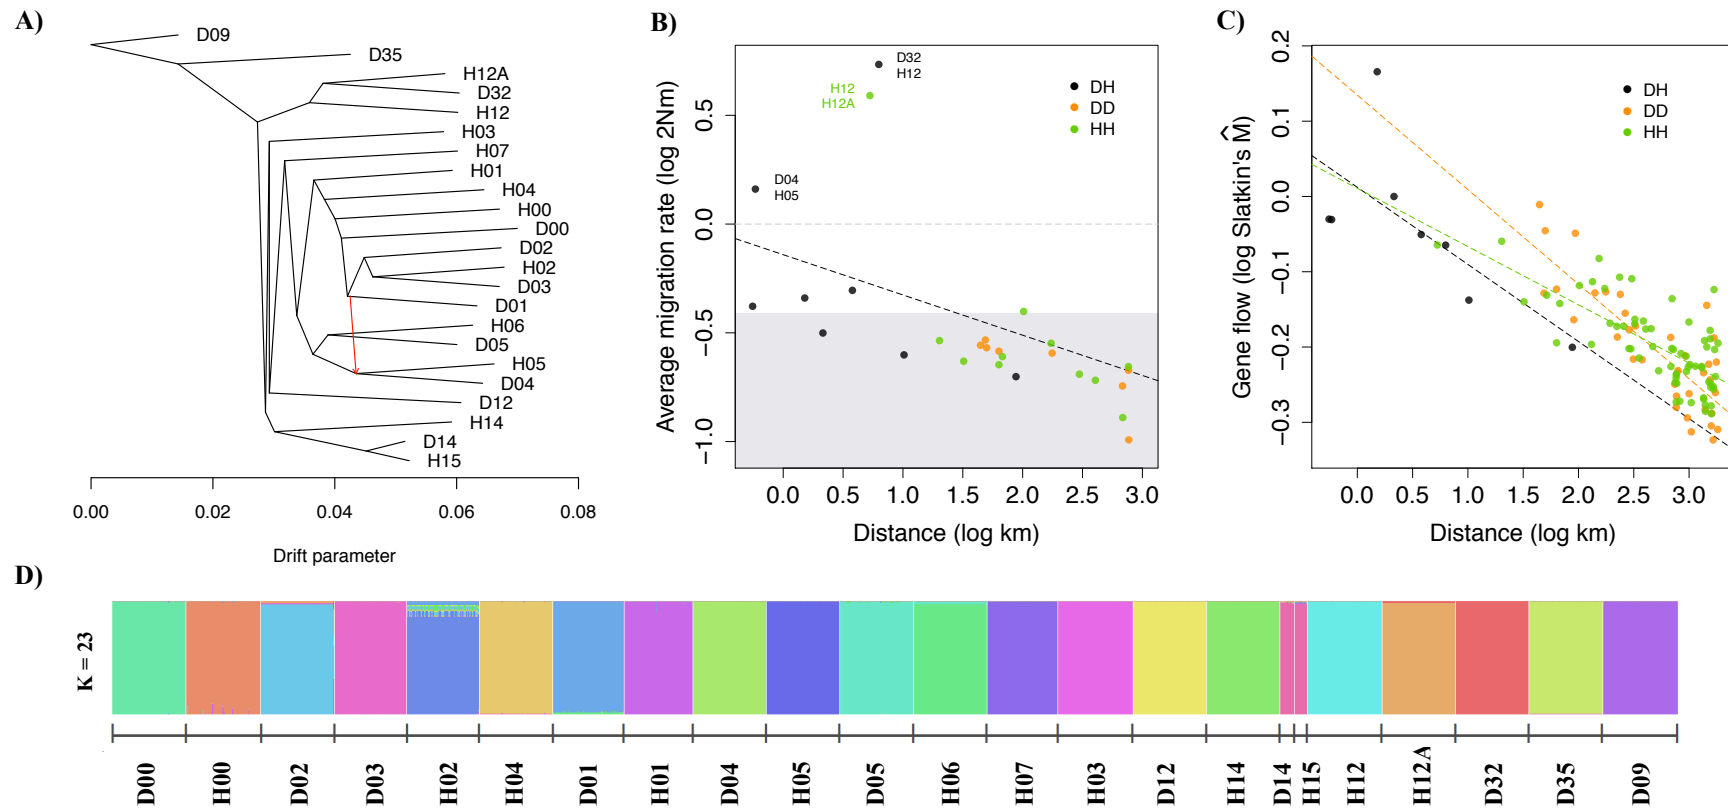

**Figure 4. Patterns of gene flow and admixture between parapatric Dune-Headland populations**

(A) Schematic diagram representing the eight demographic models and estimated parameters in *fastsimcoal2*: no migration, bidirectional migration, Dune to Headland migration, Headland to Dune migration, bidirectional migration after secondary contact, Dune to Headland migration after secondary contact, Headland to Dune migration after secondary contact, bidirectional migration after population splitting with cessation of gene flow. (B) Bayesian assignment of individuals to genetic clusters within *STRUCTURE* for  $K=2$  for the Dune (orange) and Headland (green) ecotypes at each locality. Each individual is depicted as a bar, with colours representing ancestry proportions to each cluster. Below are the migration rates ( $m$ ) from the Dune to Headland, and Headland to Dune within each locality estimated within *fastsimcoal2*. Asterisks denote pairs with  $2Nm > 1$ .

Asterisks denote pairs with  $2Nm > 1$ .

A)

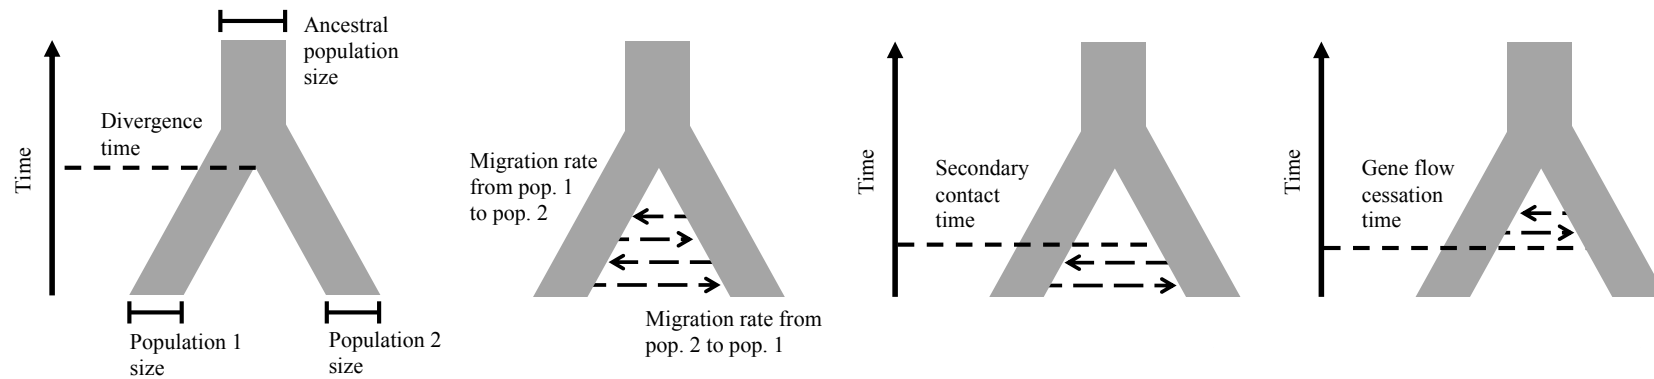

B)

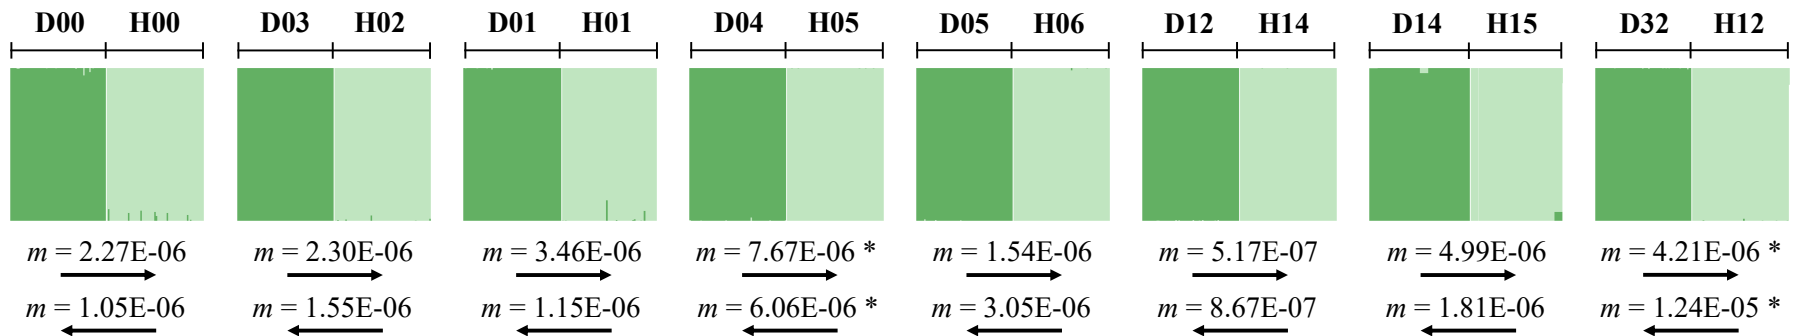





## Supplementary tables and figures

**Table S1. Sampling locations**

Sampling locations of the 23 *Senecio laetus* Dune and Headland populations. Coordinates represent the mid-point of each population. N corresponds to the final number of individuals after removing those with low coverage. Parapatric pairs in bold are sister-taxa within the phylogeny. H12A is a population found within an ecotone between the Dune (D32) and Headland (H12) at this locality.

| Clade         | Population code | Location                              | Ecotype      | Pair           | Coordinates                | N  |
|---------------|-----------------|---------------------------------------|--------------|----------------|----------------------------|----|
| Eastern       | D00             | QLD: Stradbroke Island                | Dune         | D00-H00        | S27° 31.153' E153° 30.189' | 62 |
| Eastern       | H00             | QLD: Stradbroke Island                | Headland     | D00-H00        | S27° 26.140' E153° 32.749' | 63 |
| Eastern       | D02             | QLD: Southport                        | Dune         | -              | S27° 56.846' E153° 25.736' | 62 |
| Eastern       | D03             | NSW: Cabarita                         | Dune         | <b>D03-H02</b> | S28° 19.794' E153° 34.264' | 61 |
| Eastern       | H02             | NSW: Cabarita                         | Headland     | <b>D03-H02</b> | S28° 21.013' E153° 34.676' | 61 |
| Eastern       | H04             | NSW: Byron Bay                        | Headland     | -              | S28° 38.060' E153° 38.268' | 62 |
| Eastern       | D01             | QLD: Lennox Head                      | Dune         | D01-H01        | S28° 46.858' E153° 35.655' | 60 |
| Eastern       | H01             | QLD: Lennox Head                      | Headland     | D01-H01        | S28° 48.813' E153° 36.313' | 58 |
| Eastern       | D04             | NSW: Coffs Harbour                    | Dune         | <b>D04-H05</b> | S30° 18.946' E153° 08.142' | 62 |
| Eastern       | H05             | NSW: Coffs Harbour                    | Headland     | <b>D04-H05</b> | S30° 18.741' E153° 08.676' | 62 |
| Eastern       | D05             | NSW: South West Rocks                 | Dune         | <b>D05-H06</b> | S30° 53.027' E153° 04.037' | 62 |
| Eastern       | H06             | NSW: South West Rocks                 | Headland     | <b>D05-H06</b> | S30° 52.710' E153° 04.549' | 62 |
| South-eastern | H07             | NSW: Port Macquarie                   | Headland     | -              | S31° 28.526' E152° 56.219' | 60 |
| South-eastern | H03             | NSW: Kiama                            | Headland     | -              | S34° 40.301' E150° 51.704' | 63 |
| South-eastern | D12             | NSW: Bermagui                         | Dune         | D12-H14        | S36° 28.346' E150° 03.581' | 62 |
| South-eastern | H14             | NSW: Green Cape                       | Headland     | D12-H14        | S37° 15.748' E150° 02.991' | 62 |
| South-eastern | D32             | VIC: Cape Bridgewater                 | Dune         | <b>D32-H12</b> | S38° 19.631' E141° 23.772' | 62 |
| South-eastern | H12             | VIC: Cape Bridgewater                 | Headland     | <b>D32-H12</b> | S38° 22.728' E141° 22.018' | 63 |
| South-eastern | H12A            | VIC: Cape Bridgewater                 | Intermediate | -              | S38° 20.282' E141° 23.896' | 62 |
| South-eastern | D14             | TAS: Port Arthur                      | Dune         | <b>D14-H15</b> | S43° 10.550' E147° 51.267' | 12 |
| South-eastern | H15             | TAS: Port Arthur                      | Headland     | <b>D14-H15</b> | S43° 11.240' E147° 50.672' | 11 |
| Western       | D35             | WA: Isthmus Hill                      | Dune         | -              | S35° 05.885' E117° 59.182' | 62 |
| Western       | D09             | WA: Leeuwin-Naturaliste National Park | Dune         | -              | S33° 46.239' E114° 59.541' | 63 |

**Table S2. Sequencing and alignment summary for *Senecio lautus* individuals**

Summary statistics for the 23 populations used within the study. Excluded from the table are the 19 individuals removed due to high missing data.

| <b>Population code</b> | <b>Mean # clean reads (range)</b>  | <b>Mean % mapped reads (range)</b> | <b>% mapped reads properly paired (range)</b> |
|------------------------|------------------------------------|------------------------------------|-----------------------------------------------|
| D00                    | 2,138,896 (971,466 - 3,506,240)    | 94 (62 - 98)                       | 92 (61 - 96)                                  |
| H00                    | 3,075,580 (1,528,536 - 6,198,407)  | 81 (16 - 97)                       | 79 (16 - 95)                                  |
| D02                    | 2,714,361 (895,858 - 5,258,091)    | 80 (18 - 96)                       | 76 (17 - 94)                                  |
| D03                    | 3,160,935 (2,015,566 - 8,748,545)  | 84 (21 - 97)                       | 78 (20 - 95)                                  |
| H02                    | 2,772,081 (1,408,465 - 4,192,718)  | 85 (34 - 96)                       | 83 (33 - 94)                                  |
| H04                    | 3,176,210 (1,695,120 - 5,950,574)  | 90 (72 - 97)                       | 79 (60 - 95)                                  |
| D01                    | 3,061,253 (1,318,262 - 4,548,766)  | 96 (83 - 98)                       | 90 (72 - 96)                                  |
| H01                    | 2,770,561 (1,105,881 - 6,164,034)  | 93 (42 - 98)                       | 91 (36 - 96)                                  |
| D04                    | 2,922,712 (2,146,253 - 3,718,635)  | 91 (62 - 98)                       | 83 (61 - 96)                                  |
| H05                    | 2,866,233 (1,754,603 - 4,696,562)  | 92 (71 - 97)                       | 85 (67 - 95)                                  |
| D05                    | 2,854,456 (1,554,814 - 4,156,601)  | 93 (48 - 97)                       | 87 (44 - 94)                                  |
| H06                    | 2,112,573 (1,253,010 - 3,538,428)  | 84 (37 - 97)                       | 82 (36 - 95)                                  |
| H07                    | 3,116,096 (1,646,581 - 10,437,355) | 82 (27 - 98)                       | 73 (21 - 96)                                  |
| H03                    | 2,795,169 (1,593,958 - 5,514,042)  | 77 (15 - 97)                       | 76 (14 - 95)                                  |
| D12                    | 2,700,235 (1,448,045 - 5,032,607)  | 90 (45 - 98)                       | 83 (39 - 94)                                  |
| H14                    | 3,033,007 (1,661,205 - 8,349,758)  | 71 (11 - 96)                       | 67 (11 - 95)                                  |
| D32                    | 2,854,449 (1,517,908 - 5,609,011)  | 79 (19 - 97)                       | 76 (17 - 95)                                  |
| H12                    | 2,892,473 (1,220,369 - 4,774,451)  | 83 (34 - 97)                       | 80 (33 - 94)                                  |
| H12A                   | 2,614,734 (1,509,934 - 8,120,979)  | 85 (27 - 98)                       | 82 (27 - 95)                                  |
| D14                    | 2,894,283 (1,704,586 - 4,893,613)  | 94 (75 - 98)                       | 85 (58 - 95)                                  |
| H15                    | 3,229,783 (1,823,447 - 4,958,055)  | 90 (33 - 97)                       | 84 (29 - 94)                                  |
| D35                    | 2,987,725 (1,754,767 - 6,004,276)  | 90 (62 - 98)                       | 78 (44 - 95)                                  |
| D09                    | 3,008,471 (1,794,627 - 4,826,686)  | 67 (21 - 96)                       | 63 (20 - 92)                                  |

**Table S3. Pairwise  $F_{ST}$  for *S. lautus* populations**

Pairwise  $F_{ST}$  values between all 21 populations of the south and south-eastern clades.

|             | D00  | D01  | D02  | D03  | D04  | D05  | D12  | D14  | D32  | H00  | H01  | H02  | H03  | H04  | H05  | H06  | H07  | H12  | H12A | H14  | H15 |  |
|-------------|------|------|------|------|------|------|------|------|------|------|------|------|------|------|------|------|------|------|------|------|-----|--|
| <b>D00</b>  | -    |      |      |      |      |      |      |      |      |      |      |      |      |      |      |      |      |      |      |      |     |  |
| <b>D01</b>  | 0.25 | -    |      |      |      |      |      |      |      |      |      |      |      |      |      |      |      |      |      |      |     |  |
| <b>D02</b>  | 0.25 | 0.22 | -    |      |      |      |      |      |      |      |      |      |      |      |      |      |      |      |      |      |     |  |
| <b>D03</b>  | 0.27 | 0.22 | 0.20 | -    |      |      |      |      |      |      |      |      |      |      |      |      |      |      |      |      |     |  |
| <b>D04</b>  | 0.29 | 0.25 | 0.26 | 0.28 | -    |      |      |      |      |      |      |      |      |      |      |      |      |      |      |      |     |  |
| <b>D05</b>  | 0.29 | 0.25 | 0.27 | 0.27 | 0.25 | -    |      |      |      |      |      |      |      |      |      |      |      |      |      |      |     |  |
| <b>D12</b>  | 0.34 | 0.29 | 0.31 | 0.33 | 0.31 | 0.28 | -    |      |      |      |      |      |      |      |      |      |      |      |      |      |     |  |
| <b>D14</b>  | 0.34 | 0.28 | 0.29 | 0.31 | 0.29 | 0.26 | 0.32 | -    |      |      |      |      |      |      |      |      |      |      |      |      |     |  |
| <b>D32</b>  | 0.34 | 0.30 | 0.33 | 0.34 | 0.32 | 0.30 | 0.30 | 0.32 | -    |      |      |      |      |      |      |      |      |      |      |      |     |  |
| <b>H00</b>  | 0.26 | 0.23 | 0.24 | 0.25 | 0.26 | 0.26 | 0.29 | 0.28 | 0.31 | -    |      |      |      |      |      |      |      |      |      |      |     |  |
| <b>H01</b>  | 0.26 | 0.22 | 0.25 | 0.25 | 0.25 | 0.24 | 0.26 | 0.25 | 0.28 | 0.23 | -    |      |      |      |      |      |      |      |      |      |     |  |
| <b>H02</b>  | 0.26 | 0.21 | 0.21 | 0.20 | 0.27 | 0.27 | 0.31 | 0.30 | 0.33 | 0.25 | 0.25 | -    |      |      |      |      |      |      |      |      |     |  |
| <b>H03</b>  | 0.33 | 0.29 | 0.31 | 0.32 | 0.30 | 0.27 | 0.28 | 0.30 | 0.30 | 0.29 | 0.25 | 0.31 | -    |      |      |      |      |      |      |      |     |  |
| <b>H04</b>  | 0.28 | 0.23 | 0.25 | 0.26 | 0.27 | 0.26 | 0.30 | 0.29 | 0.31 | 0.24 | 0.22 | 0.26 | 0.29 | -    |      |      |      |      |      |      |     |  |
| <b>H05</b>  | 0.29 | 0.25 | 0.27 | 0.28 | 0.21 | 0.26 | 0.31 | 0.30 | 0.32 | 0.27 | 0.25 | 0.27 | 0.30 | 0.27 | -    |      |      |      |      |      |     |  |
| <b>H06</b>  | 0.30 | 0.27 | 0.28 | 0.29 | 0.27 | 0.21 | 0.30 | 0.28 | 0.31 | 0.27 | 0.24 | 0.28 | 0.28 | 0.27 | 0.28 | -    |      |      |      |      |     |  |
| <b>H07</b>  | 0.31 | 0.27 | 0.28 | 0.29 | 0.28 | 0.24 | 0.28 | 0.28 | 0.30 | 0.27 | 0.24 | 0.29 | 0.27 | 0.27 | 0.28 | 0.26 | -    |      |      |      |     |  |
| <b>H12</b>  | 0.35 | 0.31 | 0.33 | 0.34 | 0.33 | 0.30 | 0.31 | 0.32 | 0.22 | 0.31 | 0.28 | 0.33 | 0.30 | 0.31 | 0.33 | 0.32 | 0.30 | -    |      |      |     |  |
| <b>H12A</b> | 0.34 | 0.30 | 0.33 | 0.33 | 0.32 | 0.30 | 0.29 | 0.31 | 0.20 | 0.31 | 0.27 | 0.32 | 0.29 | 0.31 | 0.32 | 0.32 | 0.30 | 0.22 | -    |      |     |  |
| <b>H14</b>  | 0.34 | 0.30 | 0.31 | 0.33 | 0.31 | 0.28 | 0.28 | 0.30 | 0.30 | 0.30 | 0.27 | 0.32 | 0.28 | 0.29 | 0.32 | 0.30 | 0.28 | 0.31 | 0.30 | -    |     |  |
| <b>H15</b>  | 0.34 | 0.28 | 0.29 | 0.31 | 0.30 | 0.26 | 0.32 | 0.15 | 0.32 | 0.28 | 0.25 | 0.30 | 0.30 | 0.29 | 0.31 | 0.28 | 0.28 | 0.32 | 0.30 | 0.30 | -   |  |

**Table S4. Estimation of gene flow rates and population parameters in *fastsimcoal2***

Populations: the two populations used for each comparison (population 1 is on the left, and population 2 on the right). Asize: ancestral effective population size. Pop1size: effective population size of population 1. Pop2size: effective population size of population 2.

DivTime: divergence time. SecTime: time since gene flow upon secondary contact. 2NmP1->P2: gene flow (2Nm) from population 1 to population 2. 2NmP2->P1: gene flow (2Nm) from population 2 to population 1. Values in bold represent  $2Nm > 1$ .

| Comparison        | Populations | Asize  | Pop1size | Pop2size | DivTime | SecTime | 2NmP1->P2     | 2NmP2->P1     |
|-------------------|-------------|--------|----------|----------|---------|---------|---------------|---------------|
| Dune-Headland     | D00-H00     | 100497 | 47926    | 134364   | 71945   | 18690   | 0.2176        | 0.2830        |
|                   | D03-H02     | 88035  | 34637    | 152616   | 44190   | 15031   | 0.1590        | 0.4722        |
|                   | D01-H01     | 72385  | 90270    | 159101   | 71918   | 13268   | 0.6241        | 0.3671        |
|                   | D04-H05     | 87603  | 90859    | 123949   | 30707   | 6329    | <b>1.3942</b> | <b>1.5024</b> |
|                   | D05-H06     | 97653  | 131873   | 70970    | 67927   | 16810   | 0.4049        | 0.4325        |
|                   | D12-H14     | 56510  | 211701   | 103102   | 110018  | 11783   | 0.2188        | 0.1787        |
|                   | D14-H15     | 102574 | 39573    | 143420   | 47929   | 39730   | 0.3952        | 0.5187        |
|                   | D32-H12     | 56568  | 661726   | 212041   | 38706   | 11290   | <b>5.5694</b> | <b>5.2694</b> |
| Dune-Dune         | D00-D02     | 97055  | 63843    | 113624   | 52711   | 6436    | 0.3242        | 0.2617        |
|                   | D01-D03     | 99168  | 142624   | 51613    | 58652   | 23772   | 0.3280        | 0.2119        |
|                   | D01-D04     | 92638  | 121936   | 74257    | 66970   | 11319   | 0.2901        | 0.2200        |
|                   | D02-D03     | 93440  | 116800   | 48492    | 54857   | 23163   | 0.3514        | 0.2029        |
|                   | D04-D05     | 78638  | 86635    | 110138   | 77895   | 18111   | 0.3178        | 0.2027        |
|                   | D05-D12     | 35322  | 103044   | 223346   | 128159  | 21689   | 0.1562        | 0.2041        |
|                   | D12-D14     | 22223  | 259172   | 38450    | 118024  | 35758   | 0.0991        | 0.1046        |
|                   | D14-D32     | 47348  | 27002    | 641721   | 56330   | 12595   | 0.3179        | 0.1074        |
| Headland-Headland | H00-H02     | 97070  | 107516   | 94259    | 81290   | 9622    | 0.3920        | 0.4012        |
|                   | H01-H04     | 78784  | 171269   | 86431    | 81443   | 19633   | 0.2561        | 0.3261        |
|                   | H01-H05     | 61893  | 173061   | 89468    | 95145   | 17016   | 0.2546        | 0.3116        |
|                   | H02-H04     | 78009  | 107213   | 91698    | 87055   | 20222   | 0.2913        | 0.1768        |
|                   | H03-H07     | 57850  | 147099   | 125603   | 109197  | 12874   | 0.1904        | 0.1921        |
|                   | H03-H14     | 63207  | 157400   | 119559   | 108683  | 9099    | 0.2068        | 0.2012        |
|                   | H05-H06     | 84257  | 109077   | 88382    | 81710   | 10907   | 0.2559        | 0.1953        |
|                   | H06-H07     | 67117  | 89121    | 141737   | 88627   | 14422   | 0.2532        | 0.2387        |
|                   | H12-H12A    | 52196  | 286574   | 322443   | 43928   | 14082   | <b>3.7584</b> | <b>4.0315</b> |
|                   | H12-H15     | 46457  | 362929   | 51902    | 81116   | 9800    | 0.1921        | 0.2501        |
|                   | H14-H15     | 46091  | 168257   | 72243    | 101092  | 18596   | 0.1396        | 0.1181        |
| Allopatric        | D03-D32     | 35657  | 53174    | 566115   | 76621   | 5201    | 0.3873        | 0.3238        |
|                   | D03-H12     | 37227  | 67316    | 333665   | 99511   | 8840    | 0.1984        | 0.2642        |
|                   | H02-H12     | 33876  | 78181    | 313687   | 111278  | 9257    | 0.1884        | 0.2707        |

**Table S5. Bootstrap values for gene flow estimates inferred in *fastsimcoal2***

Populations: the two populations used for each comparison (population 1 is on the left, and population 2 on the right). 2NmP1->P2min and max: lower and upper 95% confidence intervals for gene flow from population 1 to population 2, respectively. 2NmP2->P1min and max: lower and upper 95% confidence intervals for gene flow from population 2 to population 1, respectively. Populations in bold represent 2Nm > 1.

| Comparison        | Populations     | 2NmP1->P2min  | 2NmP1->P2max  | 2NmP2->P1min  | 2NmP2->P1max  |
|-------------------|-----------------|---------------|---------------|---------------|---------------|
| Dune-Headland     | D00-H00         | 0.2181        | 0.2281        | 0.2769        | 0.2865        |
|                   | D03-H02         | 0.1511        | 0.1611        | 0.4576        | 0.4758        |
|                   | D01-H01         | 0.5991        | 0.6174        | 0.3554        | 0.3655        |
|                   | <b>D04-H05</b>  | <b>1.3120</b> | <b>1.3648</b> | <b>1.4347</b> | <b>1.4903</b> |
|                   | D05-H06         | 0.3924        | 0.4054        | 0.4172        | 0.4321        |
|                   | D12-H14         | 0.2174        | 0.2236        | 0.1775        | 0.1840        |
|                   | D14-H15         | 0.3776        | 0.4010        | 0.5001        | 0.5215        |
|                   | <b>D32-H12</b>  | <b>4.9046</b> | <b>5.0810</b> | <b>5.2088</b> | <b>5.3999</b> |
| Dune-Dune         | D00-D02         | 0.3186        | 0.3344        | 0.2576        | 0.2686        |
|                   | D01-D03         | 0.3183        | 0.3305        | 0.2040        | 0.2137        |
|                   | D01-D04         | 0.2818        | 0.2911        | 0.2148        | 0.2226        |
|                   | D02-D03         | 0.3417        | 0.3563        | 0.2000        | 0.2096        |
|                   | D04-D05         | 0.3106        | 0.3228        | 0.2008        | 0.2078        |
|                   | D05-D12         | 0.1533        | 0.1584        | 0.2020        | 0.2077        |
|                   | D12-D14         | 0.0976        | 0.1011        | 0.1037        | 0.1068        |
|                   | D14-D32         | 0.3109        | 0.3274        | 0.1050        | 0.1106        |
| Headland-Headland | H00-H02         | 0.3828        | 0.3952        | 0.3901        | 0.4038        |
|                   | H01-H04         | 0.2504        | 0.2574        | 0.3183        | 0.3290        |
|                   | H01-H05         | 0.2485        | 0.2558        | 0.3033        | 0.3139        |
|                   | H02-H04         | 0.2892        | 0.2978        | 0.1741        | 0.1802        |
|                   | H03-H07         | 0.1882        | 0.1945        | 0.1917        | 0.1975        |
|                   | H03-H14         | 0.2029        | 0.2089        | 0.1976        | 0.2038        |
|                   | H05-H06         | 0.2526        | 0.2610        | 0.1926        | 0.1992        |
|                   | H06-H07         | 0.2460        | 0.2537        | 0.2310        | 0.2382        |
|                   | <b>H12-H12A</b> | <b>3.6292</b> | <b>3.7754</b> | <b>3.9901</b> | <b>4.1278</b> |
|                   | H12-H15         | 0.1878        | 0.1954        | 0.2484        | 0.2574        |
| H14-H15           | 0.1357          | 0.1415        | 0.1163        | 0.1202        |               |
| Allopatric        | D03-D32         | 0.3699        | 0.3893        | 0.3174        | 0.3273        |
|                   | D03-H12         | 0.1932        | 0.2013        | 0.2604        | 0.2680        |
|                   | H02-H12         | 0.1832        | 0.1900        | 0.2645        | 0.2731        |

**Figure S1. Summary of TreeMix runs**

(A) Maximum likelihood tree with no migration. (B) Residuals for the no migration tree. (C) Log-likelihoods for each model for 1-25 migration events. (D) Proportion variance explain for each model for 1-25 migration events.

A)

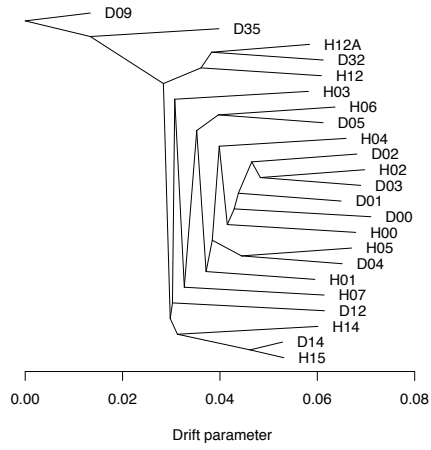

B)

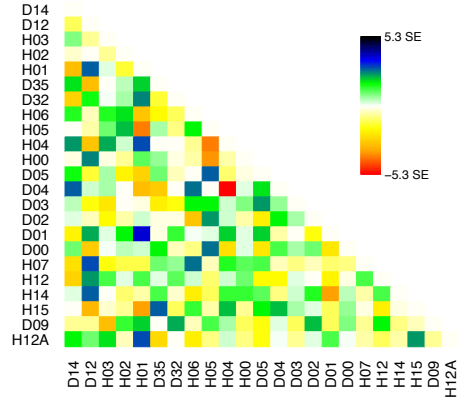

C)

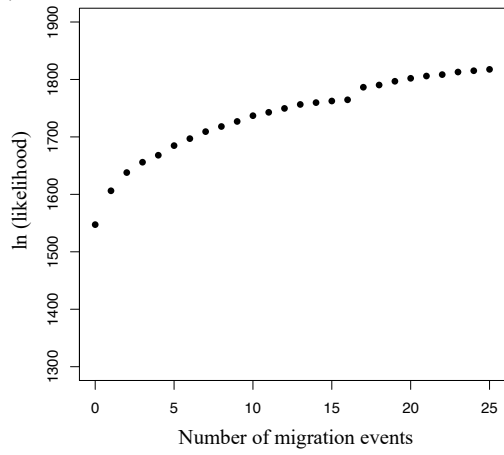

D)

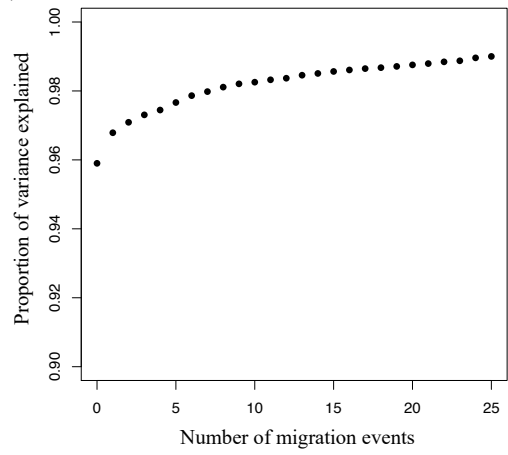



### Figure S2. TreeMix migration events 1-10

Maximum likelihood tree with 10 migration events. Coloured arrows denote the intensity and direction of migration events.

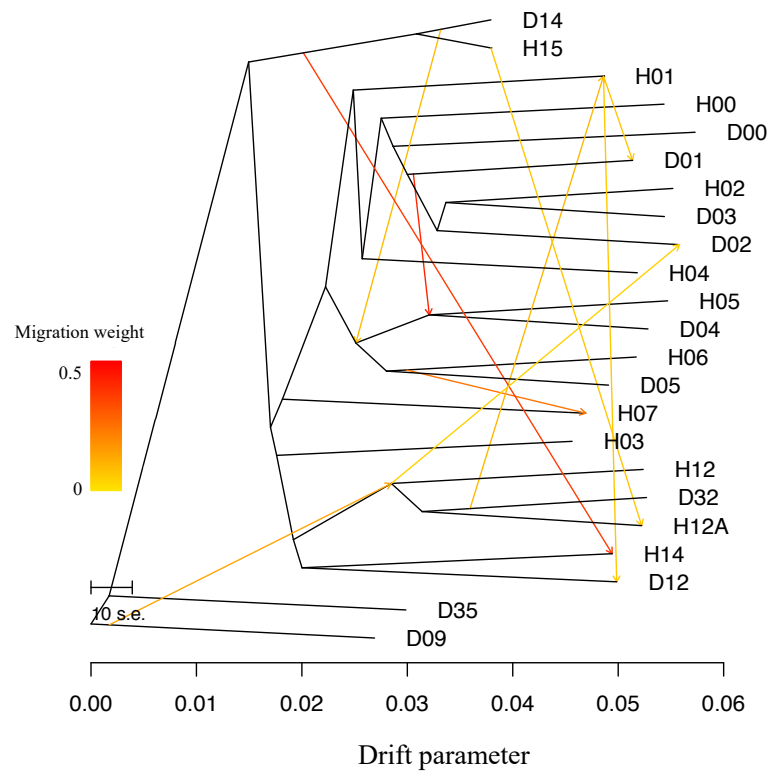

**Figure S3. Frequency distribution of  $f_3$ -statistics**

Frequency distribution of  $f_3$ -statistics calculated in *TreeMix* across all populations.

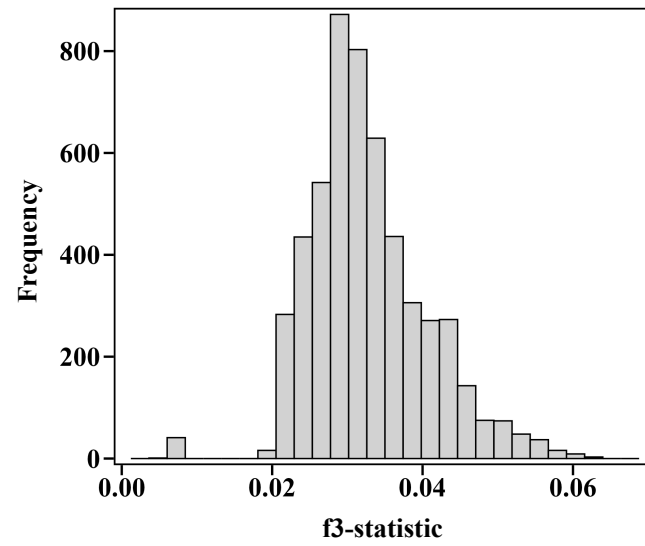

**Figure S4. *fastSTRUCTURE* K=22, K=28 and marginal likelihoods**

**(A)** Bayesian assignment of individuals to genetic clusters within *fastSTRUCTURE* for K=22 and K = 28. Each of the 1,319 individuals is depicted as a bar, with colours representing ancestry proportions to each cluster. Populations are ordered according to their geographic distribution along the coast. **(B)** Marginal likelihood values for successive K-values within *fastSTRUCTURE*. Red dashed lines denote the K-value that best explained the structure in the data (K = 22), as well as the K-value that maximised the marginal likelihood of the data (K = 28). **(C)** Change in marginal likelihoods from *fastSTRUCTURE* for successive K-values. Red dashed line denotes K = 23, higher K-values with negligible change in likelihood values.

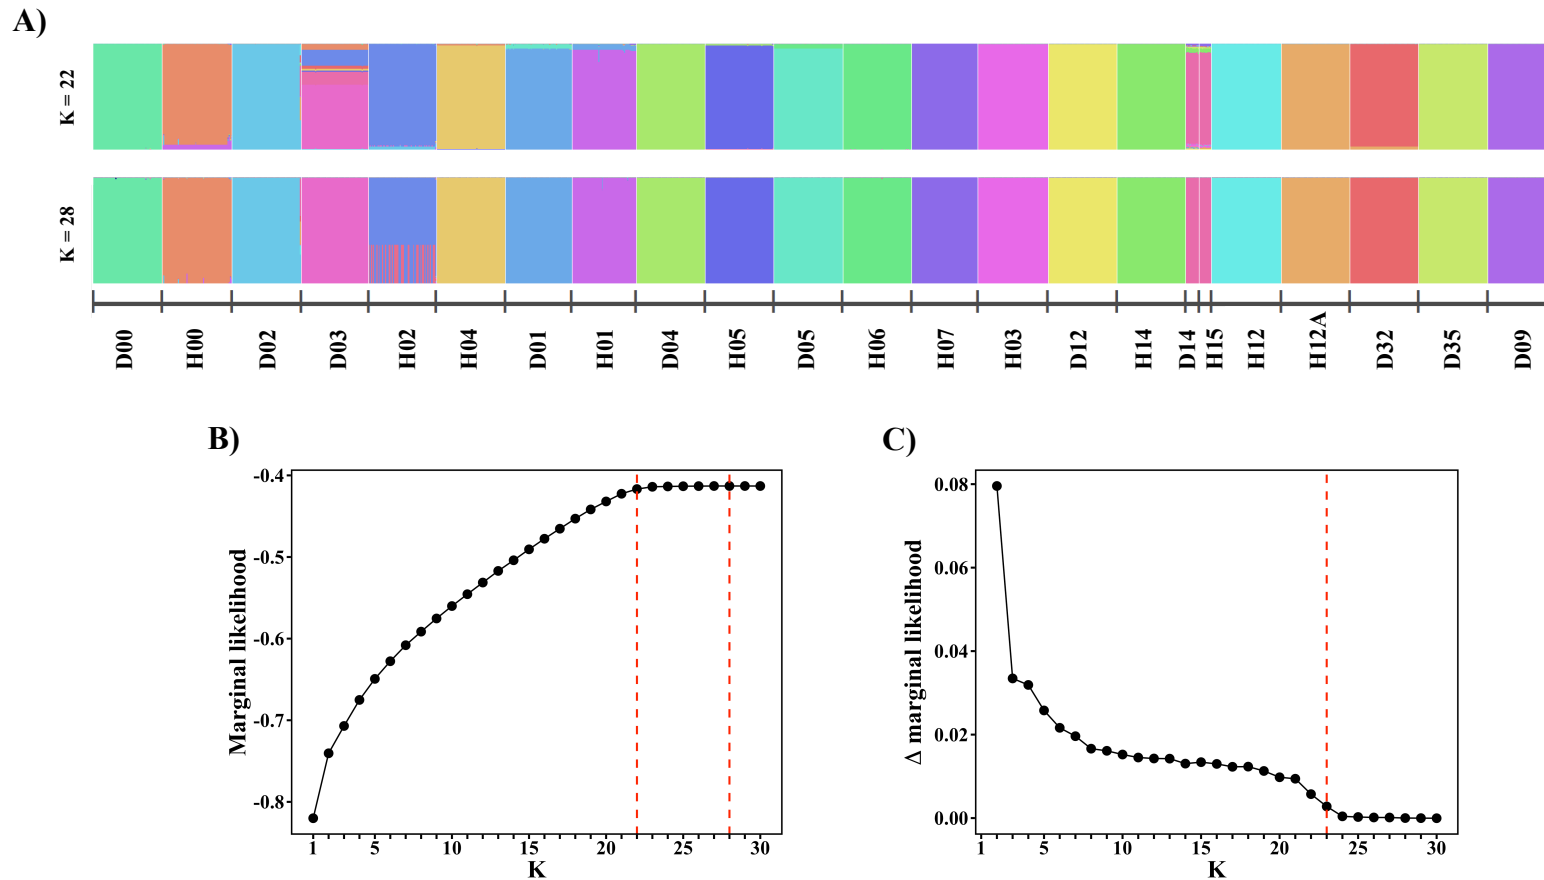

**Figure S5. *STRUCTURE* best K-values for Dune-Headland pairs**

*STRUCTURE* best K-values for the eight Dune-Headland replicate pairs, based on the maximum value for  $\Delta K$  (the second order rate of change in the log probability of data between successive K-values).

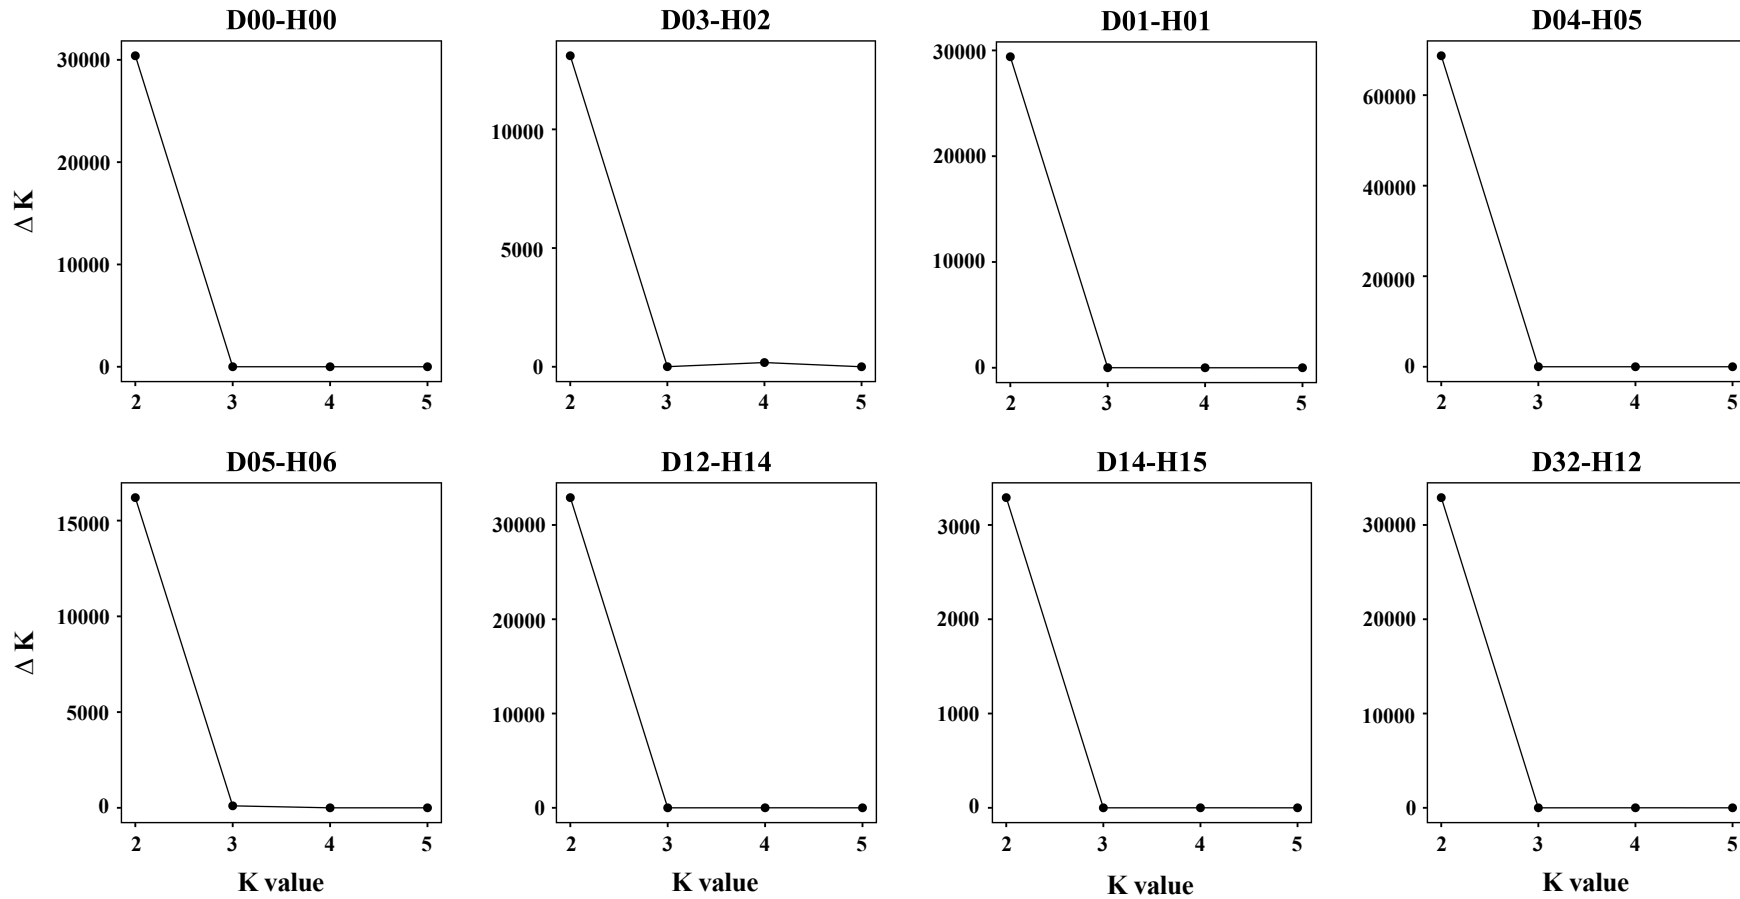

**Figure S6. Log-likelihood values for the eight demographic models tested in *fastsimcoal2* per pair**

NM: no migration. BM: bidirectional migration. M21: migration from population 2 to 1. M12: migration from population 1 to 2. BSC: bidirectional migration after secondary contact. SC21: migration from population 2 to 1 after secondary contact. SC12: migration from population 1 to 2 after secondary contact. EBM: bidirectional migration after population splitting with cessation of gene flow.

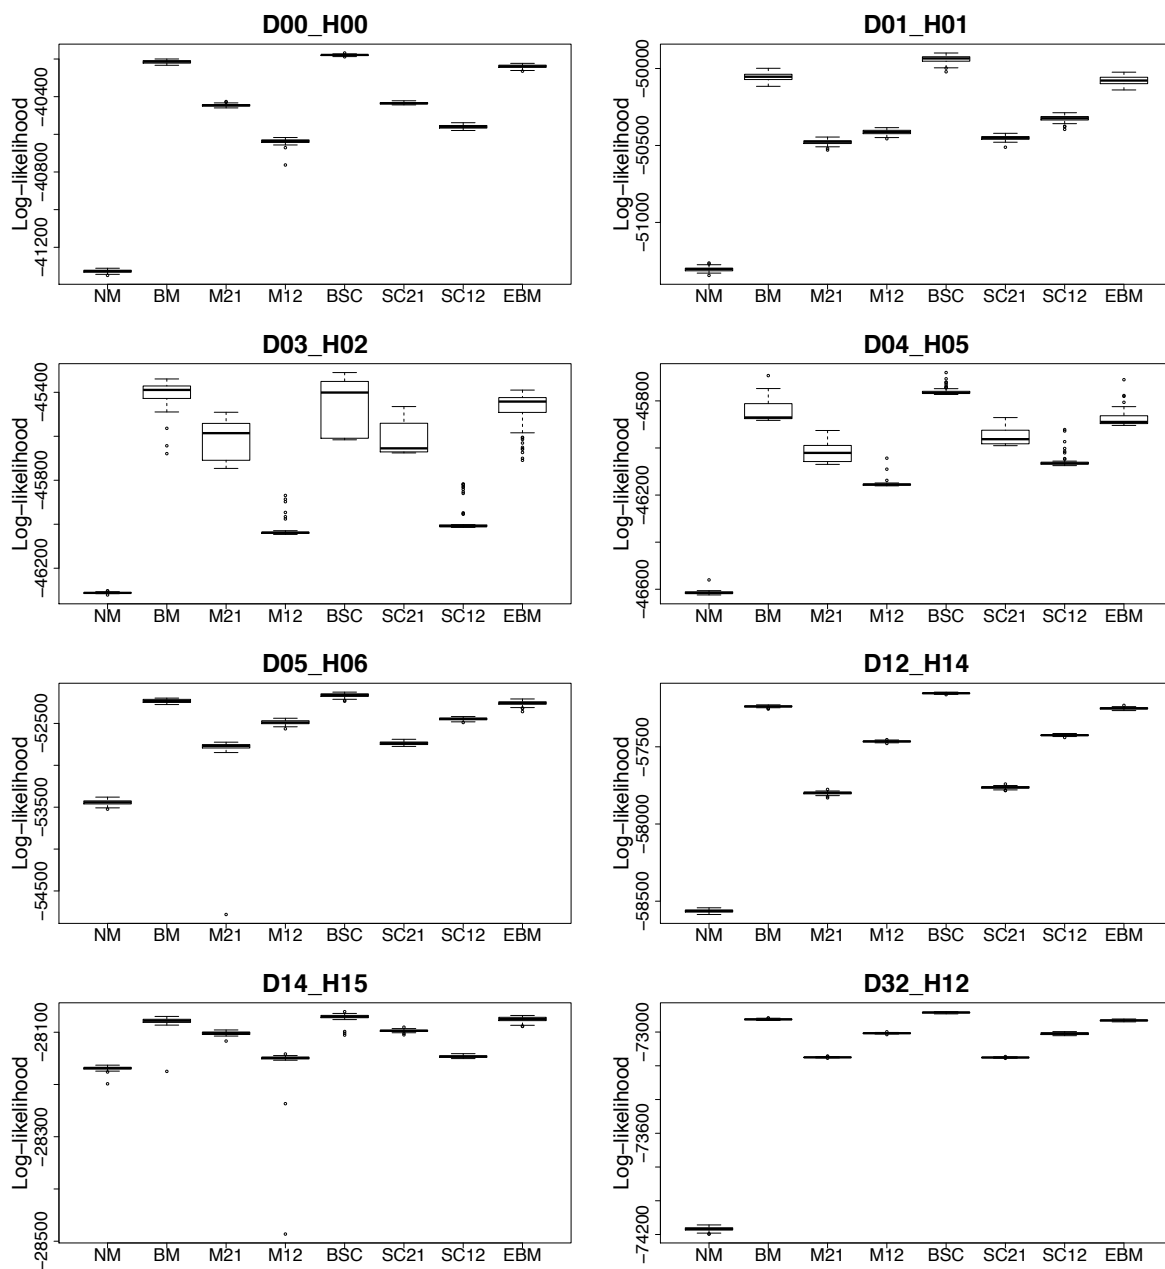

Figure S6 cont.

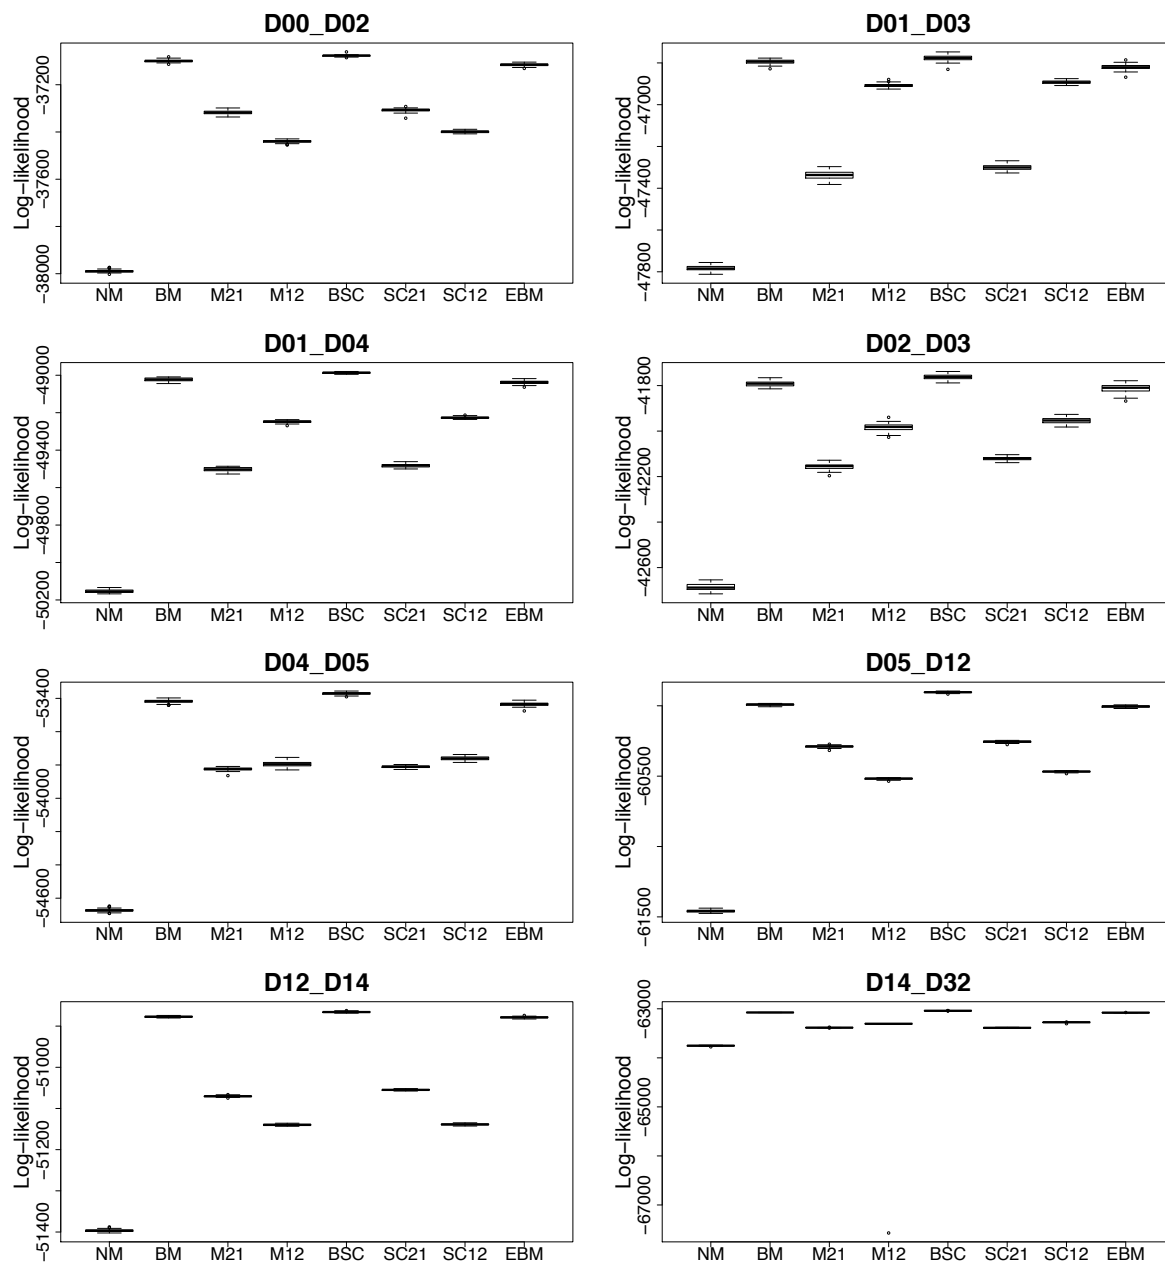



Figure S6 cont.

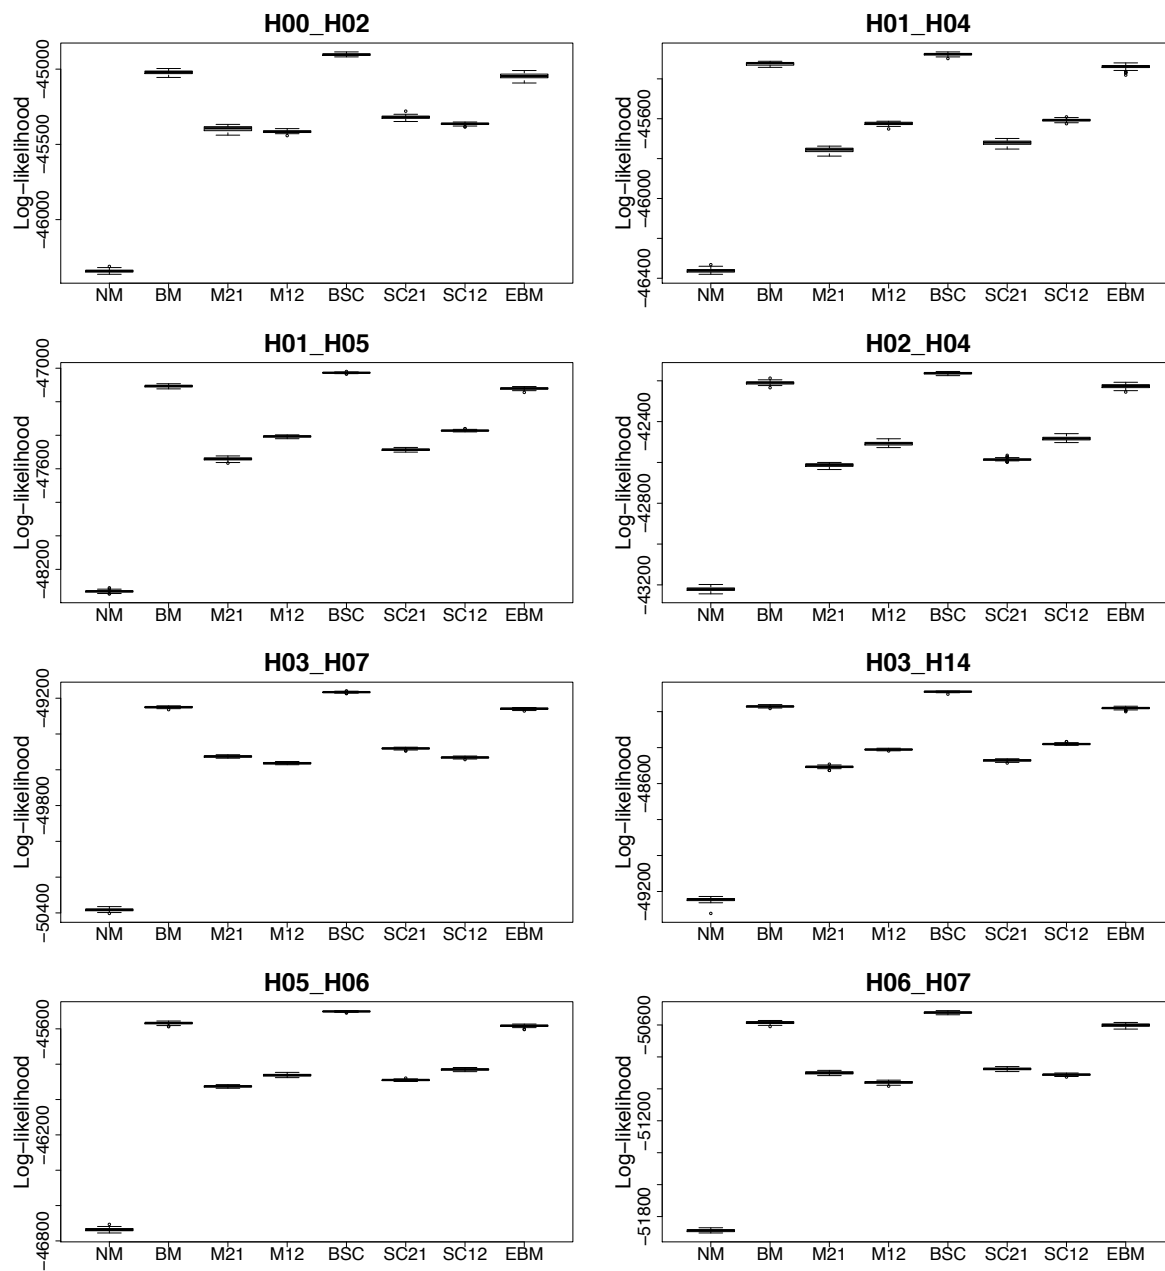

Figure S6 cont.

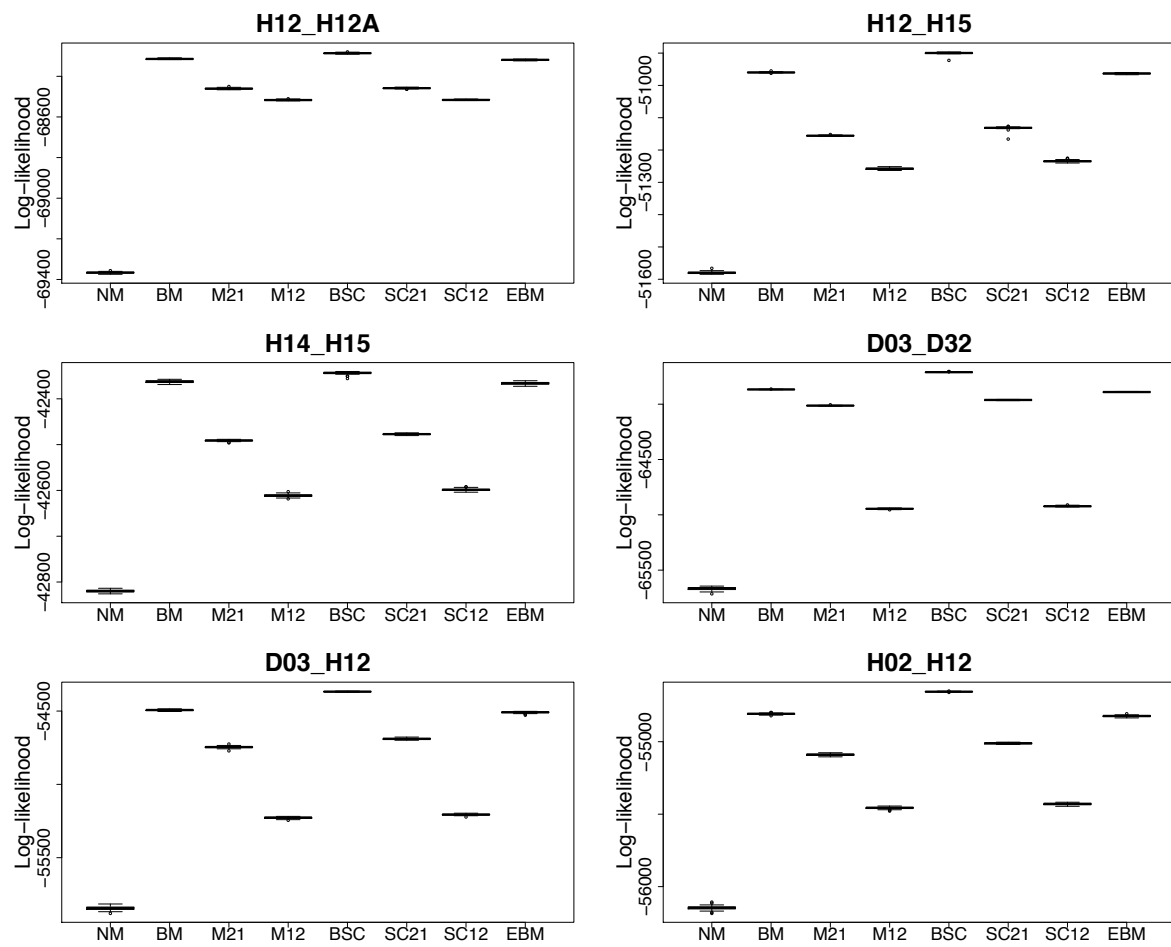

**Figure S7. Likelihood values for testing if migration is significantly different from zero**

*Max L*: maximum likelihood for the best run from the best model. *A*: Gene flow from population 2 to 1 is fixed ( $2Nm = 0.01$ ). *B*: gene flow from population 1 to 2 is fixed ( $2Nm = 0.01$ ). *C*: gene flow in both directions is fixed ( $2Nm = 0.01$ ). The asterisk denotes the pair where any of the migration rates is not significantly different from  $2Nm = 0.01$ .

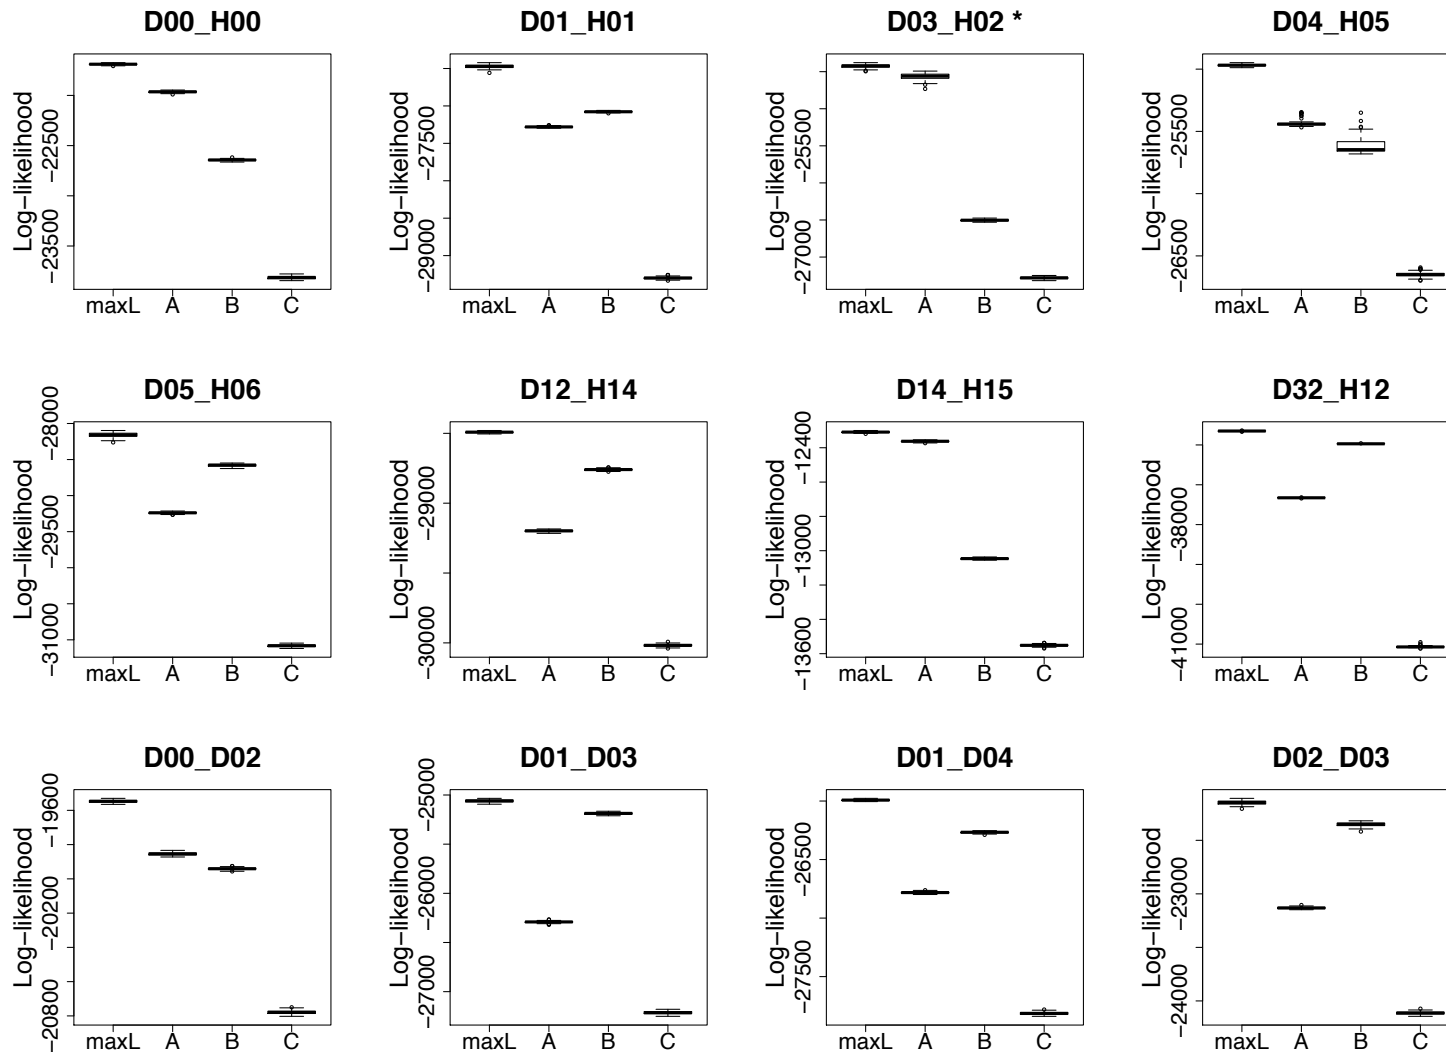

Figure S7 cont.

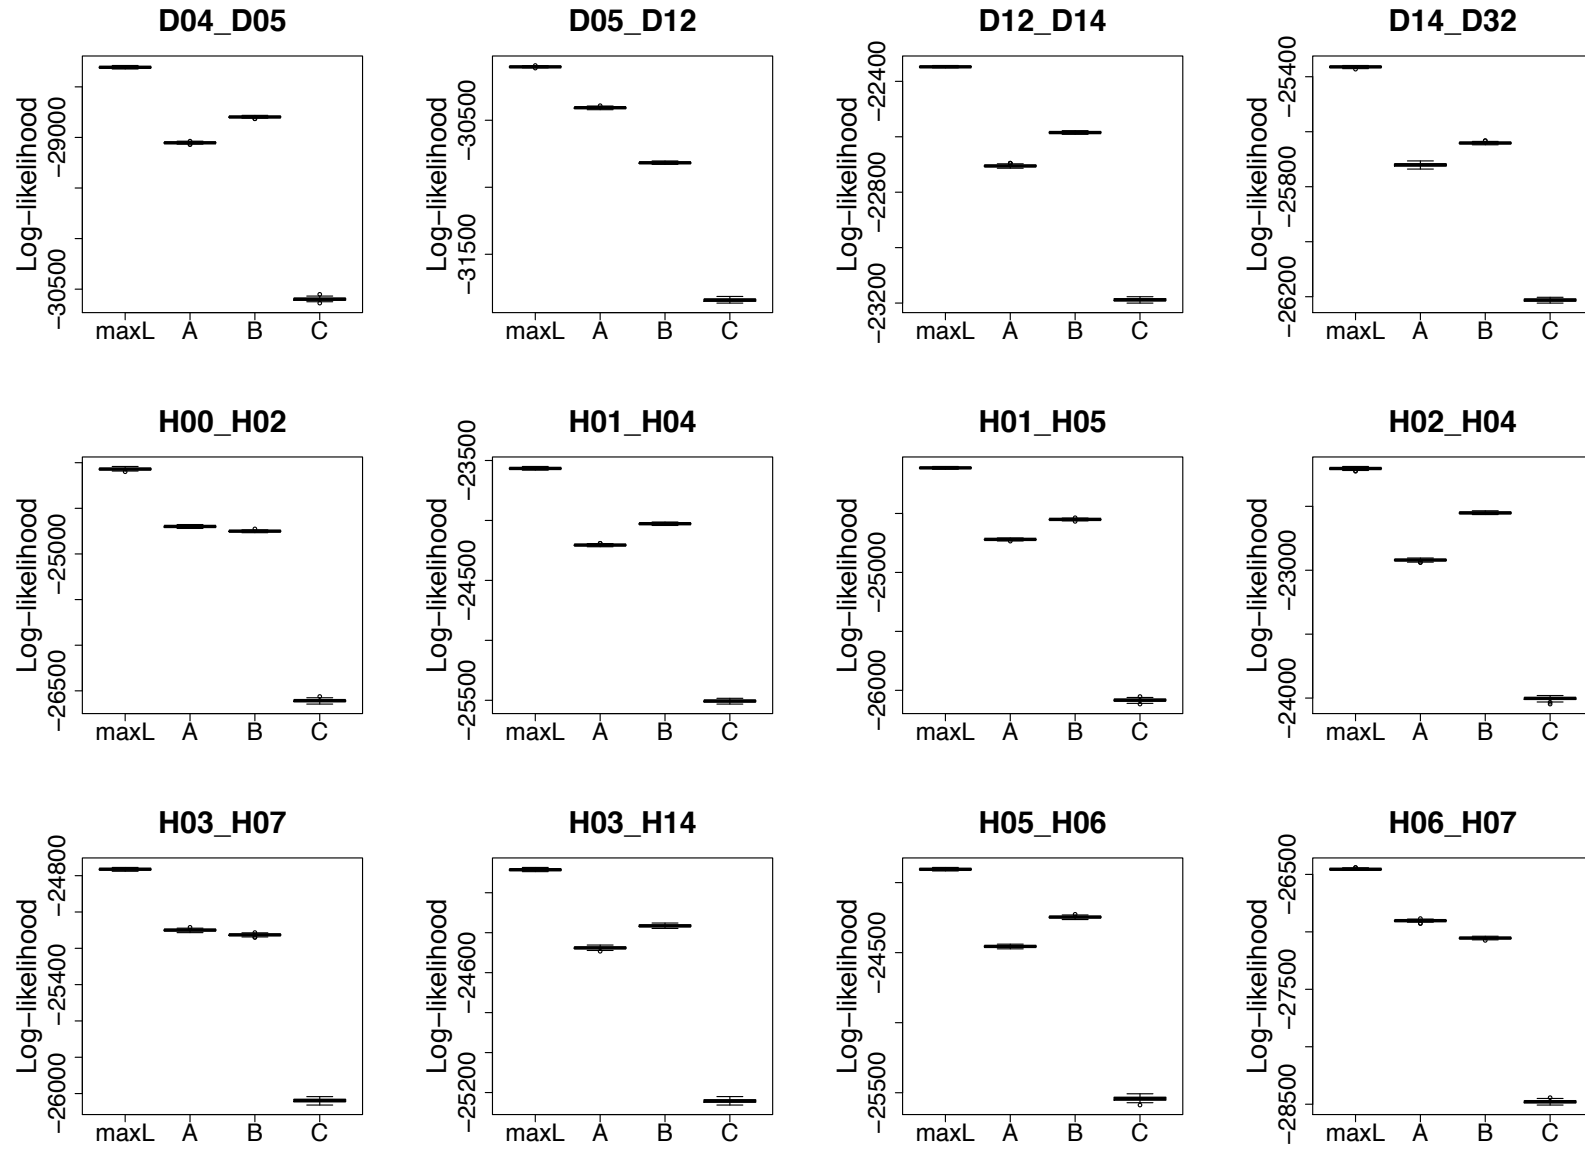

Figure S7 cont.

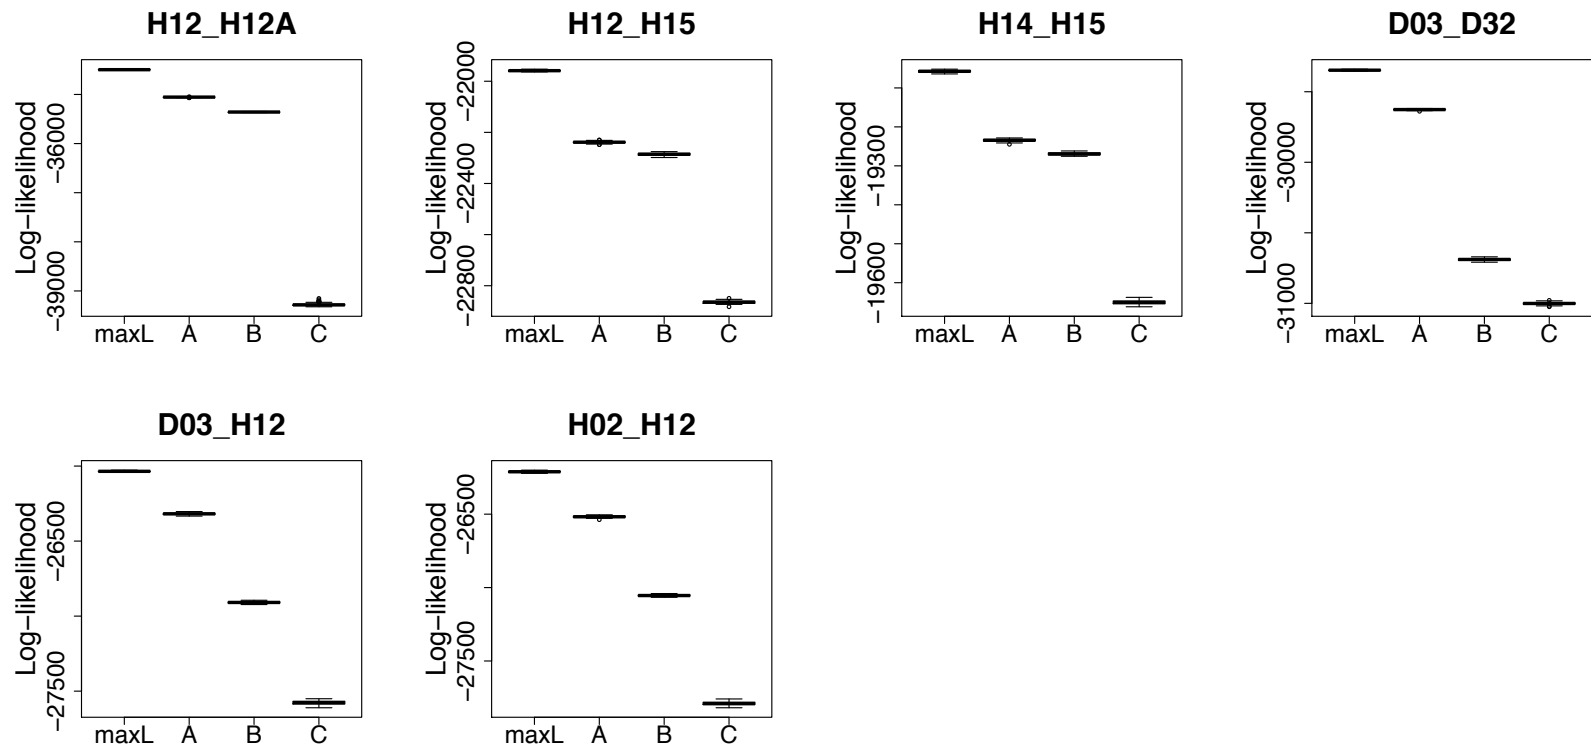

## Supplementary methods

### Estimation of the number of monomorphic sites per pair

To estimate the monomorphic sites per pair we first calculated the number of RAD loci by using *PLINK* to thin for one SNP per RAD locus. The total read length of each RAD locus was (on average) 190bp (taking into account the length of the sequencing read after removal of barcodes/indexes). We used the following formula to calculate the number of monomorphic sites per pair:

$$\text{Monomorphic sites} = (\text{read length} \times \text{number RAD loci}) - \text{number variable sites}$$

Here, we may be slightly overestimating the number of monomorphic sites as we are assuming all sites without a called SNP are monomorphic, although some could be actual variants that were not called due to not passing filtering requirements. Nevertheless, the parameter estimates (especially the migration rates) were robust to varying the number of monomorphic sites (data not shown).

### *SLiM2* code for simulations

```
initialize() {
  if (exists("slimgui")) {
    defineConstant("seed", 1);
    defineConstant("mu", 1e-7);
    defineConstant("r", 1e-8);

    defineConstant("N", 100);
    defineConstant("t1", 10000);
    defineConstant("t2", 5000);
    defineConstant("mig", 0);
    defineConstant("tSec", 0.1);
    defineConstant("outPath", "~/workspace/PopGenSims/OriginScenarios");
  }

  setSeed(seed);
  initializeMutationRate(mu);
  initializeMutationType("m1", 0.5, "r", 0.0);
  initializeGenomicElementType("g1", m1, 1.0);
  initializeGenomicElement(g1, 0, 1e6 - 1);
  initializeRecombinationRate(r);
}

1 {

  // create ancestral population
  sim.addSubpop("p0", N);

  // schedule split and migration events based on parameter values
  t0 = 10*N;
  outGen = t0+t1+t2;

  sim.rescheduleScriptBlock(s1, start=t0+1, end=t0+1);
  sim.rescheduleScriptBlock(s2, start=t0+t1+1, end=t0+t1+1);
  sim.rescheduleScriptBlock(s4, start=outGen, end=outGen);

  if(mig == 0){
    sim.deregisterScriptBlock(s3);
  } else
```



```

sim.rescheduleScriptBlock(s3, start=asInteger(t0+t1+1+round(t2*(1-tSec))), end=outGen);
}
s1 10 {
// initial split of ecotypes here
sim.addSubpopSplit("p10", N, p0);
sim.addSubpopSplit("p100", N, p0);
p0.setSubpopulationSize(10);
}
s2 20 {
// output t1 vcf here
outgroup = sample(p0.individuals, 1);
ingroup = sapply(sim.subpopulations[sim.subpopulations != p0], "sample(applyValue.individuals, 30, replace = F);");
set = c(outgroup, ingroup);
set.genomes.outputVCF(filePath = paste(c(outPath, "/", "t1.replicate-", seed, ".vcf"), sep=""), outputMultiallelics = F);

// subsequent split into populations here
sim.addSubpopSplit("p11", N, p10);
sim.addSubpopSplit("p101", N, p100);
}
s3 30 {
// initialize migration here between parapatric divergent ecotypes
p10.setMigrationRates(p100, mig);
p100.setMigrationRates(p10, mig);
p11.setMigrationRates(p101, mig);
p101.setMigrationRates(p11, mig);
}
s4 40 late() {
// output final vcf here
outgroup = sample(p0.individuals, 1);
ingroup = sapply(sim.subpopulations[sim.subpopulations != p0], "sample(applyValue.individuals, 30, replace = F);");
set = c(outgroup, ingroup);
set.genomes.outputVCF(filePath = paste(c(outPath, "/", "t2.replicate-", seed, ".vcf"), sep=""), outputMultiallelics = F);
}

```

## R code for the genealogical sorting index (GSI) calculations

# Code modified from: Ravinet, M. et al. The genomic landscape at a late stage of stickleback speciation: High genomic divergence interspersed by small localized regions of introgression. PLoS Genet 14, e1007358 (2018).

```

# ===== Load Dependencies =====
library(ape)
suppressMessages(library(vcfR))
library(geiger)
suppressMessages(library(adegenet))

# ===== Read Input Data =====
args <- commandArgs(trailingOnly = TRUE)
filename <- args[1]

#filename <- "~/Dropbox (OL)/OriginScenarios-results/N-1000.t1-10000.t2-10000.tSec-0.25.mig-1e-06/t2.replicate-1.vcf"
vcf <- read.vcfR(filename, verbose = FALSE)

# ===== Define gsi Function =====
gsi <- function(tr, grp){
  n <- length(grp) - 1
  # only consider internal nodes (tips get index 1:Ntip(tr))
  internal.nodes <- seq(Ntip(tr)+1, Ntip(tr) + Nnode(tr))
  # For each internal node, what are the descendant tips
  node.descendants <- lapply(internal.nodes, function(n) tips(tr, n))

  # ----- Jeff Groh 10 May 2019 -----
  # Previous code contained an error in the following lines:

```

```

# Which nodes have descendants in the group being considered?
# required <- sapply(descendants, function(x) any(grp %in% x) )
# The problem with this is that it selects *all* nodes which contain *any*
# members of the focal group. However, in the denominator for the gsi calculation,
# we are only interested in summing the degrees of nodes which belong to the minimum
# subtree that contains all members of the focal group. The code below fixes this by
# selecting the correct set of nodes.

# find root of minimum subtree containing all members of focal group
# how many tips of the focal group are descended from each node
n.focal.members <- sapply(node.descendants, function(x){ length(which(grp %in% x) )})
# how many total tips are descended from each node
n.total.members <- sapply(node.descendants, function(x){ length(x) })
# to be a root of the minimum subtree, a node must contain at least all members of the focal group
candidate.subtree.roots <- which(n.focal.members >= length(grp))
# Out of these, the node with the least number of total descendants will be the subtree root
candidates.total.members <- n.total.members[candidate.subtree.roots]
winner <- candidate.subtree.roots[which(candidates.total.members == min(candidates.total.members))]
root.node <- internal.nodes[winner]
# find all tips which descend from the min subtree root node
subtree.tips <- tips(tr, root.node)
# find all nodes whose descendants include any of those tips
nodes.with.focal.descendants <- sapply(node.descendants, function(x)any(subtree.tips %in% x))
# but with fewer descendants than that of the subtree root node
node.depths <- node.depth(tr)[internal.nodes]
root.depth <- node.depths[winner]
# select required nodes for calculation
required.nodes <- nodes.with.focal.descendants == TRUE & node.depths <= root.depth
# ----- End Correction -----

# How many connections to those nodes have? (tree is not necessarily
# dichotomous)
degree <- table(tr$edge)[ internal.nodes[required.nodes] ]
# Ape takes one connection off the root node, so if d=2 then treat it as d=3
# (no other nodes can have d=2)
obs.gs <- n / (sum( degree - 2 ) + sum(degree==2))
# minGS (basically same procedure but for whole tree)
degree.total <- table(tr$edge)[seq(Ntip(tr)+1, Ntip(tr) + Nnode(tr))]
min.gs <- n / (sum( degree.total - 2 ) + sum(degree.total==2))
gsi <- (obs.gs - min.gs) / (1 - min.gs)
return(gsi)
}

# ===== Calculate GSI From Phylogenetic Tree =====
# Calculate gsi with respect to environment, that is, high gsi should reflect
# apparent monophyly of groups from the same location (multiple origins)
# rather than monophyly of true clades (single origin).
# Also calculate gsi for true clades so these can be compared.
# In vcf output from slim, individuals are organized sequentially as such:
# p0 (1 individual), p10, p11, p100, p101 (30 individuals each)
# where there is gene flow between p10 & p100 and also p11 & p101 (parapatric pairs).
# Create vectors of names of individuals that belong to these groups.
# This will be used as input for the gsi calculation.

all.ind <- colnames(vcf@gt)[-c(1:2)] # this vector starts with i1 (excluding outgroup)
loc1 <- all.ind[c(1:30,61:90)]
loc2 <- all.ind[c(31:60,91:120)]
clade1 <- all.ind[c(1:60)]
clade2 <- all.ind[c(61:120)]

# Calculate gsi for entire chromosome (1Mb)
gen <- as.matrix(vcfR2genlight(vcf))
tr <- root(nj(dist(gen)), outgroup = "i0", resolve.root = TRUE)

gsi.clade1 <- gsi(tr, clade1)
gsi.clade2 <- gsi(tr, clade2)
gsi.loc1 <- gsi(tr, loc1)
gsi.loc2 <- gsi(tr, loc2)

# ===== Output GSI Values =====
cat(paste(c(gsi.clade1, gsi.clade2, gsi.loc1, gsi.loc2), sep="t"))
cat("\n")

```
