# 1 **Highly replicated evolution of parapatric ecotypes**

2 Maddie E. James<sup>1\*</sup>, Henry Arenas-Castro<sup>1</sup>, Jeffery S. Groh<sup>1,2</sup>, Jan Engelstädter<sup>1</sup>, Daniel Ortiz-  
3 Barrientos<sup>1</sup>

4 <sup>1</sup>The University of Queensland, School of Biological Sciences, St. Lucia QLD 4072,  
5 Australia. <sup>2</sup>Current address: University of California, Davis, Department of Evolution and  
6 Ecology, Davis, CA 95616, United States.

7 \* Corresponding author

## 8 **Abstract**

9 Parallel evolution of ecotypes occurs when selection independently drives the evolution of  
10 similar traits across similar environments. The multiple origin of ecotypes is often inferred on  
11 the basis of a phylogeny which clusters populations according to geographic location and not  
12 by the environment they occupy. However, the use of phylogenies to infer parallel evolution  
13 in closely related populations is problematic due to the potential for gene flow and  
14 incomplete lineage sorting to uncouple the genetic structure at neutral markers from the  
15 colonization history of populations. Here, we demonstrate multiple origins within ecotypes of  
16 an Australian wildflower, *Senecio lautus*. We observed strong genetic structure as well as  
17 phylogenetic clustering by geography, and show this is unlikely due to gene flow between  
18 parapatric ecotypes, which is surprisingly low. We further confirm this analytically by  
19 demonstrating that phylogenetic distortion due to gene flow often requires higher levels of  
20 migration than those observed in *S. lautus*. Our results imply that selection can repeatedly  
21 create similar phenotypes despite the perceived homogenizing effects of gene flow.

## 22 Introduction

23 Parallel evolution occurs when populations evolve similar traits after repeatedly and  
24 independently colonizing similar habitats<sup>1</sup>. The patchy distribution of habitats means that  
25 phenotypically similar populations frequently occur next to other contrasting phenotypes  
26 (e.g., plant species adapted to serpentine and non-serpentine soils in Scandinavia<sup>2</sup>, and  
27 marine snails adapted to crab predators or wave action along the rocky coasts of Spain<sup>3</sup>).  
28 Parallel evolution by natural selection creates consistent patterns of phenotypic similarity and  
29 divergence that can extend to morphological<sup>4-6</sup>, behavioural<sup>7</sup>, and reproductive<sup>8</sup> traits. The  
30 nature of parallel trait evolution largely depends on the demographic history of the system  
31 under investigation, where the interplay of geography, gene flow, and natural selection with  
32 the genetic architecture of traits determines its repeatability<sup>9-15</sup>. However, it is surprisingly  
33 rare for studies of parallel evolution to convincingly demonstrate that populations exhibiting  
34 similar phenotypes have arisen in an independent and repeated fashion ('multiple origin'  
35 scenario). Ruling out alternative demographic scenarios, such as a single origin of ecotypes  
36 followed by gene flow upon secondary contact, is seldom performed (but see refs. <sup>16-19</sup>, and  
37 see ref. <sup>20</sup> for a critical review of the evidence in plants). In light of this, researchers may  
38 incorrectly assume a parallel demographic history, leading to inaccurate inferences about the  
39 prevalence of parallel evolution in nature.

40 Typically, researchers identify parallel evolution by natural selection by asking whether  
41 phylogenetic clustering of populations coincides with the geography and not with the ecology  
42 of populations<sup>3,17,18,21,22</sup>. This is because genetic clustering of geographically close  
43 populations implies dispersal might be geographically restricted (i.e., isolation by distance<sup>23</sup>),  
44 and colonization of contrasting and neighboring habitats might have occurred independently  
45 many times. The rationale for this argument is that the genome-wide phylogenetic history can  
46 be used as a proxy for understanding the history of adaptation across multiple populations.  
47 That is, if adaptation appears to have taken place on different genetic backgrounds, then the  
48 genetic changes that drove adaptation likely occurred independently. By genetic changes, we  
49 refer specifically to independent allele frequency changes driven by similar natural selection  
50 pressures, rather than the identity of the beneficial mutations themselves<sup>24</sup>.

51 The above argument rests upon the assumption that the genome-wide pattern of relatedness  
52 accurately depicts the history of the loci underlying adaptation, though this is not necessarily  
53 the case. For example, alternative historical scenarios could also lead to clustering of

54 populations by geography, and must be ruled out before examining the evolution of traits in  
55 light of parallel evolution<sup>16,25–27</sup>. To understand this problem, first consider a scenario where  
56 an ancestral population gives rise to two locally adapted populations that occupy ecologically  
57 distinct yet geographically proximate habitats (hereafter ecotypes, Fig. 1A). These two  
58 populations migrate to new localities in parallel, where each time the same contrasting  
59 habitats are geographically close. This scenario of a single split followed by range expansion  
60 of two ecotypes does not involve a parallel adaptation history because each ecotype only  
61 arose once (rather than multiple independent times after independent colonization of  
62 contrasting habitats). Because gene flow is either not possible after the original ecotypic split,  
63 or does not homogenize adjacent populations after range expansion, populations sharing the  
64 same ecology form reciprocally monophyletic clades in a phylogeny (Fig. 1A).

65 Nevertheless, if there is sufficient gene flow between geographically close populations from  
66 two ecotypes that originated only once, the original phylogenetic signal of reciprocal  
67 monophyly can be eroded<sup>16,25–27</sup>. In other words, as the original genome-wide phylogenetic  
68 signal of a single origin disappears, populations become most related to their neighboring  
69 population and not to the other populations of the same ecotype. Therefore, gene flow can  
70 result in grouping of populations by geography rather than ecology (Fig. 1B). This  
71 phylogenetic signal is identical to that of true parallel evolution (a multiple origin scenario),  
72 where the derived ecotype arises multiple independent times from the ancestral ecotype (Fig.  
73 1C). Gene flow dynamics can thus fundamentally alter our interpretation of parallel  
74 evolution, to the extent that we can mistakenly infer parallel evolution in systems where  
75 secondary contact after range expansion of a single origin has obscured the history of locally  
76 adapted populations<sup>16,25–27</sup>. We note that non-monophyly is not a requirement for parallel  
77 evolution in a more general sense, but it is so in systems where parallel evolution coincides  
78 with a patchy geographic distribution of populations (pairs of ecotypes in multiple  
79 localities)<sup>16</sup>, where the phylogenetic line of reasoning is commonly employed.

80 In systems of parallel evolution, gene flow is frequently detected between populations,  
81 especially when contrasting ecotypes are in close geographic proximity (i.e., parapatry).  
82 Although not all levels of gene flow have the same equivocal effect on the genetic record of  
83 colonization history<sup>16</sup>, gene flow between ecotypes must be taken into account when  
84 demonstrating parallel evolution within a system. However, only very few systems have  
85 thoroughly investigated the demographic history of populations, and even fewer have used

86 coalescent modelling or simulations to address whether the estimated levels of gene flow  
87 could have obscured the observed phylogeny. The system that has perhaps most clearly  
88 demonstrated the parallel origins of contrasting populations in the presence of gene flow is  
89 the marine snail *Littorina saxatilis*. Multiple lines of evidence suggest the wave and crab  
90 ecotypes have evolved multiple independent times along rocky coastlines<sup>3,16–19</sup>. Other  
91 systems providing clear evidence for parallel evolution include Lake Victoria cichlids<sup>28</sup> and  
92 alpine and montane *Heliosperma pusillum* ecotypes<sup>22</sup>. Also, an obvious case of multiple  
93 origins is when parallel evolution occurs between geographically distant populations where  
94 gene flow could not have obscured the phylogenetic signal and demographic history of  
95 populations (e.g., threespine stickleback populations that colonized freshwater environments  
96 on separate continents<sup>29</sup>). However, in other systems where gene flow is moderate between  
97 ecotypes<sup>30–34</sup>, it remains unclear to what extent gene flow contributed to the signal of parallel  
98 evolution.

99 Despite the potential for gene flow to paint a false picture of the phylogenetic history of  
100 multiple populations adapted to the same environment, this false signal itself does not  
101 necessarily negate the argument for parallel evolution. For one, it is possible that two  
102 populations that are true sister groups in a phylogenetic sense –a single origin of the genetic  
103 background– did in fact adapt independently. Second, distortion of the phylogenetic topology  
104 by gene flow occurs under rather restrictive settings, namely high migration rates, as we  
105 show in our results. Thus, for the trait-environment association to have persisted in spite of  
106 constant reintroduction of maladaptive alleles implies that selection must have had to  
107 regenerate the optimal phenotype independently across populations. In other words, if gene  
108 flow was indeed sufficiently high to have distorted the phylogenetic topology in multiple  
109 cases, selection must have independently resisted the introduction of maladaptive alleles. In  
110 this manner, Lee and Coop's (ref. <sup>24</sup>) framing of independence as an overlap in selective  
111 deaths across populations can be extended to consider both the overlap in selective deaths  
112 during the initial sweep, as well as during a secondary phase of resisting maladaptive gene  
113 flow.

114 We must keep in mind that identifying the genetic basis of parallel trait evolution often  
115 provides unambiguous evidence for parallel evolution of ecotypes. For instance, in  
116 sticklebacks, the repeated evolution of pelvic loss in separate populations occurred via  
117 different mutations in the same gene<sup>35</sup>, suggesting this adaptive trait has arisen and been

118 selected for multiple independent times. In contrast, in systems where the exact same  
119 mutation is repeatedly involved in adaptation (e.g., ref. <sup>36</sup>), it is challenging to identify  
120 whether the adaptive mutation was repeatedly and independently selected for in each  
121 population (either from de-novo mutations or via standing genetic variation<sup>24,37</sup>). Knowing  
122 the causal genes of adaptation is ideal as the demographic history of individual adaptive loci  
123 can be modelled, avoiding the complications of distinguishing between single and multiple  
124 origins using neutral polymorphisms (as described above). However, directly isolating the  
125 specific genes involved in adaptation is infeasible in most non-model organisms or when the  
126 genetic architecture of adaptation is highly polygenic<sup>38,39</sup>.

127 The above considerations suggest that without knowing the genetic basis of parallel  
128 adaptation, we should carefully characterize and interpret the phylogeographic history to  
129 understand the level of independence in systems where populations are adapted to similar  
130 environments. Such an approach is necessary to demonstrate that natural selection has  
131 independently acted in separate populations during the repeated adaptation to similar  
132 environments. This knowledge paves the way for future research on dissecting the molecular  
133 basis of parallel adaptation, and its implications for our understanding of the predictability  
134 and repeatability of evolution. In this work, we characterize the phylogenetic and  
135 demographic history of *Senecio lautus*, an Australian wildflower that appears to have evolved  
136 multiple times in parapatry into two contrasting coastal forms called Dune and Headland  
137 ecotypes<sup>40,41</sup>. The two forms differ in their growth habit: the Dune ecotype is erect and  
138 inhabits sand dunes, and the Headland ecotype is prostrate, forming mats on the ground of  
139 rocky headlands<sup>42-44</sup>. These locally adapted populations<sup>40,45-49</sup> are separated by strong  
140 extrinsic reproductive isolation<sup>40,47</sup>, and populations exhibit similar morphology within each  
141 ecotype<sup>50,51</sup>. With this work we hope to clearly illustrate how the demographic history of  
142 populations affects the evidence for the independent and repeated origins of parapatric  
143 ecotypes.

144 Previous work using pools of DNA sequences from multiple coastal, inland, alpine, and  
145 woodland *S. lautus* ecotypes found that strong isolation by distance separated all populations  
146 along the coast and that geography, not ecology, explained the phylogenetic clustering of its  
147 coastal populations<sup>41</sup>. Although these results suggest that the Dune and Headland ecotypes  
148 have evolved in parallel, it remains unclear if gene flow could be responsible for this pattern  
149 of ecotypic and geographic differentiation, thus potentially affecting our inferences on the

150 number of independent colonization and origin events of multiple Dune and Headland  
151 populations. Here, we directly estimate patterns of gene flow between 23 Dune and Headland  
152 populations, as well as other parameters important for characterizing the demographic history  
153 of this system. We create a coalescent model to explore the conditions that would erode a  
154 signal of phylogenetic monophyly of each ecotype, thus enabling us to gain further  
155 confidence in our conclusions about parallel parapatric divergence in this system. Our results  
156 enhance our understanding of the nature of parallel evolution and pave the way for analyses  
157 of parallel trait evolution driven by natural selection in plants, where cases of parallelism  
158 remain understudied.

## 159 **Results**

### 160 **Populations cluster by geography and not by ecology**

161 To ask whether populations cluster according to their geographic distribution, we explored  
162 broad patterns of genetic clustering across the 23 Dune and Headland *S. laetus* populations  
163 (Fig 2A). Phylogenetic inference in *IQ-TREE* provides evidence against a single origin  
164 scenario: neither ecotype forms a monophyletic clade, and parapatric Dune-Headland  
165 populations are often sister-taxa, giving evidence for the multiple origin of ecotypes (Fig.  
166 2B). To visualize the major genetic structure within *fastSTRUCTURE*, we plotted the lowest  
167 K-values that capture the major structure in the data as suggested by refs. <sup>52,53</sup>, although the  
168 “best” K-value across all populations was higher (see below). The clustering of populations  
169 into two genetic groups (K=2) revealed a striking correspondence to geography (Fig. 2C),  
170 where the eastern populations (dark blue) are separated from those populations further south  
171 and to the west (light blue). This strong genetic structuring into two main clades suggests  
172 there are at least two independent origins within the system. When three genetic groups  
173 (K=3) are considered, the eastern populations are further separated into two clusters, again  
174 largely corresponding to geography and reflecting the phylogenetic structure of the data; K=4  
175 distinguishes the west Australia populations from those on the south-eastern coast. This  
176 genetic clustering of populations according to their geographic distribution provides further  
177 evidence against a single origin scenario, and is consistent with previous work in this  
178 system<sup>41,54</sup>.

## 179 Minimal admixture across the system

180 To understand the role of gene flow in shaping the patterns of divergence across the system,  
181 we explored patterns of admixture in a phylogenetic context within *TreeMix* and formally  
182 tested for admixture using  $f_3$ -statistics across the 23 Dune and Headland populations. In the  
183 absence of migration, the *TreeMix* phylogeny explained 95.9% of the data, with 24 additional  
184 migration events augmenting this value to 98.9 % (Supplementary Fig. S1). Fig. 3A shows  
185 the first migration event ( $P < 2.2 \times 10^{-308}$ ) with a migration weight ( $w$ ) of 0.40. Although the  
186 24 other migration events were also significant ( $P_{\text{average}} = 2.92 \times 10^{-3}$ ,  $SD = 0.0062$ ), their  
187 individual weightings were small (see Supplementary Fig. S2 for 1-10 migration events),  
188 most of them were not between parapatric pairs, and the addition of these migration events  
189 did not substantially alter the topology from its estimation in the absence of gene flow.  
190 Although these results could suggest a potential complex colonization history including long  
191 distance yet rare migration events, these P-values should be treated with caution. This is  
192 because model comparisons in *TreeMix* suffer from multiple testing, a large number of  
193 parameters, and the estimated graph can be inaccurate<sup>55</sup>. We therefore tested the robustness  
194 of this inference using  $f_3$ -statistics. All  $f_3$ -statistics were positive (Supplementary Fig. S3),  
195 giving no evidence of admixture between any populations. Strong isolation by distance  
196 within each ecotype further supports this contention using  $\hat{M}$  as a proxy for migration rates  
197 (IBD within Dunes: Mantel test,  $r = -0.83$ ,  $P = 0.0001$ ; within Headlands  $r = -0.73$ ,  $P =$   
198  $< 0.0001$ ; Fig. 3C). A strong IBD trend exists between ecotypes for the eight pairs studied  
199 here ( $\hat{M}$ :  $F_{1,6} = 0.55$ ,  $P = 0.05661$ , multiple  $R^2 = 0.48$ , Fig. 3C). Although the same trend was  
200 seen in the migration rate estimates from *fastsimcoal2*, it was not statistically significant,  
201 perhaps due to the low sample size (*fastsimcoal2*:  $F_{1,6} = 0.53$ ,  $P = 0.4953$ , multiple  $R^2 = 0.08$ ,  
202 Fig. 3B). Overall, this pattern of IBD implies that there is geographically restricted dispersal  
203 within the system and populations are evolving largely independently from one another.

204 The absence of admixture across the system is also supported by *fastSTRUCTURE* across all  
205 populations. The inferred value of K is close to the number of sampled populations  
206 (Supplementary Figs. S4B, S4C) and each population is genetically distinct (Supplementary  
207 Fig. S4A), suggesting that *S. lautus* has a simple demographic history with limited  
208 admixture<sup>52</sup>. Specifically, the K-value that best explained the structure in the data was 22, and  
209 the K-value that maximized the marginal likelihood of the data was 28 (Supplementary Fig.  
210 S4B). The rate of change in the likelihood of each K-value was negligible for K=24-28

211 (Supplementary Fig. S4C). Together, this suggests that the optimal K-value is around 23,  
212 which is the number of populations within our study. The *fastSTRUCTURE* results for K=23  
213 show that each population forms a distinct genetic cluster (Fig. 3D), suggesting very little, if  
214 any, admixture between them. This further implies that each sampled population has been  
215 separated from other populations long enough to be genetically distinct (see pairwise  $F_{ST}$   
216 values in Supplementary Table S1) and with insufficient levels of gene flow to homogenize  
217 their genomes<sup>52</sup>. Further, when we examine all K-values from 1-23, there is a distinct  
218 hierarchical structure that mirrors the phylogeny, suggesting that such structure is an accurate  
219 representation of the history of the populations. The Tasmania population pair (D14-H15)  
220 should be treated with caution due to the smaller sample size ( $n_{Dune} = 12$ ,  $n_{Headland} = 11$ )  
221 compared to other populations ( $n_{mean} = 62$ ,  $SD = 1.19$ ). For groups with few samples, genetic  
222 clustering programs such as *fastSTRUCTURE* are likely to assign them as mixtures of  
223 multiple populations rather than their own distinct population<sup>52</sup>. This is evident for K=22,  
224 where the Tasmania populations appear admixed (Supplementary Fig. S4A).

## 225 **Minimal gene flow between parapatric ecotypes and distant populations**

226 We investigated whether the parapatric ecotypes at each locality have diverged in the face of  
227 gene flow by analyzing patterns of admixture in *STRUCTURE* and directly estimating levels  
228 of gene flow in *fastsimcoal2*. We observed very few admixed individuals between the  
229 parapatric Dune-Headland populations at each locality within the *STRUCTURE* analysis for  
230 K=2 (Fig. 4B). On average, 9.36% ( $SD = 5.48$ ) of individuals were admixed per population,  
231 although their admixture proportions were on average less than 1% (mean = 0.8%,  $SD = 1.8$ ).  
232 This suggests that gene flow between parapatric populations might have ceased in the past.  
233 For all pairs, the best K-value based on the Evanno method<sup>56</sup> was K=2 (Supplementary Fig.  
234 S5). Demographic modelling in *fastsimcoal2* revealed the most likely divergence model for  
235 all comparisons within and between ecotypes was bidirectional gene flow after secondary  
236 contact ( $w_i > 0.99$ ; Supplementary Fig. S6). For Dune-Headland population pairs, direct  
237 measurements of migration rates were very low, with all Dune-Headland migration rates  
238 below one ( $2Nm < 1.00$ ), except for D04-H05 and D32-H12 where  $2Nm$  was slightly above  
239 one (Fig. 3B upper section, 4B; Supplementary Tables S2, S3). For Dune-Dune population  
240 comparisons we also detected very low migration rates ( $2Nm_{mean} = 0.23$ ,  $SD = 0.09$ ;  
241 Supplementary Tables S2, S3), with all comparisons containing  $2Nm < 1.00$ . Similarly, for  
242 Headland-Headland comparisons we again detected very low migration rates ( $2Nm_{mean} =$



243 0.57, SD = 1.01), with all comparisons containing  $2Nm < 1.00$ , with the exception of H12-  
244 H12A (Fig. 3B upper section, 4B; Supplementary Tables S2, S3). Across all comparisons, all  
245 Dune-Dune pairs and most Headland-Headland pairs exhibited gene flow levels lower than  
246 the maximum migration rate of allopatric populations separated by more than 1,500 km (i.e.,  
247 the null gene flow expectation;  $2Nm = 0.39$ ; Fig. 3B). Three Dune-Headland pairs (D00-H00,  
248 D03-H02 and D12-H14) were also within this null range. Alternative models that assumed  
249 negligible gene flow, while keeping other demographic parameters fixed, did not fit the data  
250 better with the exception of the D03-H02 pair (Supplementary Fig. S7). Although the most  
251 likely divergence scenario for all population comparisons was bidirectional gene flow after  
252 secondary contact, migration rates under all models were very low across all population pairs  
253 ( $2Nm_{\text{mean}} = 0.58$ , SD = 1.43, Supplementary Table S4). Thus, even if our choice of model  
254 was biased towards secondary contact<sup>57</sup>, the extent of gene flow during the history of  
255 populations is consistently low and does not depend strongly upon the mode of divergence.

## 256 **Potential for gene flow to obscure a single origin scenario**

257 We analyzed a neutral coalescent model representing a single origin of the derived ecotype to  
258 investigate under which situations the history at a neutral locus unlinked to the selected site  
259 would indicate a pattern of non-monophyly of the derived ecotype, thus potentially  
260 supporting a false inference of parallel evolution. We found a clear influence of all examined  
261 parameters (Fig. 5A) on the probability of inferring non-monophyly, suggesting that certain  
262 demographic scenarios can lead to an observed phylogenetic signal that belies the history of a  
263 single origin of ecotypes. When internal branches ( $t2 - t1$ ) are short, and ancestral  
264 polymorphism is expected to be elevated, the probability of distortion is high and relatively  
265 independent of migration rates in the terminal branches (Fig. 5B, lower section of graph).  
266 When internal branches are long, the probability of distortion is low and again relatively  
267 independent of migration rates (Fig. 5B, upper section of graph). Furthermore, when the  
268 terminal branches ( $t1$ ) are long relative to the timing of the burst of migration ( $tm$ ),  
269 phylogenetic distortion requires high levels of migration (Fig. 5C, upper section of graph).  
270 When the terminal branches are short relative to the timing of migration, very high levels of  
271 migration are required to distort the phylogeny (Fig. 5C, lower section of graph). Note that  
272 the probability of phylogenetic distortion when the terminal branches are long relative to the  
273 timing of migration is not as high as the distortion due to short internal branches (pay  
274 attention to the different scale of probability in Fig. 5C compared to Fig. 5B).

275 Although we cannot directly map our observed data for *S. lautus* in the modelled parameter  
276 space, we can nonetheless explore the likelihood of phylogenetic distortion by considering  
277 divergence time estimates from *fastsimcoal2* in combination with the phylogenetic topology  
278 estimated in *IQ-TREE*. If the parphyly in our phylogeny is not an artifact of gene flow, we  
279 expect the order of divergence times estimated from *fastsimcoal2*, which accounts for gene  
280 flow, to be in accordance with the observed phylogeny, which does not account for gene  
281 flow. We observed deeper divergence times for populations of the same ecotype compared to  
282 sister-taxa of different ecotypes. For D04-H05 and D05-H06, the average divergence time  
283 between populations of the same ecotype (D04-D05 and H05-H06) was 79,801 generations  
284 (SD = 2,698), whereas the average divergence time between populations at each locality  
285 (D04-H05 and D05-H06) was 49,317 generations (SD = 26,319). This was also true for D14-  
286 H15 and D32-H12, where the average divergence time between populations of the same  
287 ecotype (D14-D32 and H15-H12) was 68,723 generations (SD = 17,526), and the average  
288 divergence time between populations at each locality (D14-H15 and D32-H12) was 43,318  
289 generations (SD = 6,522). Overall, this gives further evidence that the phylogenetic topology  
290 (estimated in the absence of gene flow) has not resulted from gene flow distortion.

## 291 **Discussion**

292 We have used an array of complementary approaches to disentangle the demographic history  
293 of the coastal *Senecio lautus* ecotypes. In this system, many lines of evidence support a  
294 multiple origin scenario for the evolution of the parapatric Dune and Headland populations.  
295 The demographic history of this system reveals striking population structure and a strong  
296 effect of geography and restricted dispersal, to the extent that all populations are evolving  
297 largely independently from each other. Together with previous results from transplant  
298 experiments<sup>40,45-49</sup>, our results convincingly show that selection and drift, rather than gene  
299 flow, play a predominant role in the genetic structure among ecotypic populations in this  
300 system. Below we discuss these results in light of parallel parapatric divergence in this highly  
301 replicated system.

302 Large scale genetic structure within *S. lautus* clusters populations according to their  
303 geographic distribution along the Australian coast, and not by the environment they occupy.  
304 Within *fastSTRUCTURE*, the largest genetic groups encompass two clades which are largely  
305 independent of each other, do not have evidence of long-distance gene flow between them,  
306 and also appear to contain multiple repeated instances of parapatric divergence. This genetic

307 structure, where populations group by geography and not ecology, is mirrored in the  
308 phylogeny, and is consistent with our previous work using targeted sequencing of 13 neutral  
309 genes<sup>54</sup> and RADseq using pools of individuals<sup>41</sup>. There is also a strong signal of isolation by  
310 distance<sup>23</sup> within each ecotype as well as across Dune-Headland pairs, implying long distance  
311 dispersal within the system is not pervasive, and populations are likely at an equilibrium  
312 between dispersal and drift<sup>58</sup>. This is perhaps not surprising given that Dune and Headland  
313 populations have restricted geographic ranges along the coast.

314 Fine scale genetic structure at the level of the locality (i.e., parapatric Dune-Headland  
315 populations) shows that each population is genetically distinct.  $F_{ST}$  values are above 0.2 for  
316 most population pair comparisons, and *fastSTRUCTURE* reveals that all parapatric pairs are  
317 fully differentiated with little admixture. Consistent with this, no single estimate of the  $f_{3-}$   
318 *statistic* for any population triad was negative, further suggesting that there are negligible  
319 levels of admixture between parapatric populations as well as across the entire system.  
320 Despite the high potential for gene flow between parapatric populations due to their close  
321 geographic proximity and relatively weak F1 intrinsic reproductive isolation<sup>40,45,47</sup>, multiple  
322 transplant experiments in the system have shown that divergent natural selection is strong and  
323 creates extrinsic reproductive isolation between Dune and Headland populations at each  
324 locality<sup>40,45-49</sup>. Therefore our findings are in agreement with theoretical expectations, where  
325 parapatric divergence and speciation is favored when gene flow is limited and selection  
326 against immigrants and hybrids is strong<sup>59,60</sup>. Overall, a combination of strong selection and  
327 limited dispersal can explain why parapatric populations persist despite the opportunity for  
328 homogenizing gene flow between them.

329 A common doubt arising in purported cases of parallel evolution is whether gene flow is  
330 responsible for the grouping of populations by geography and not by ecology<sup>3,16-</sup>  
331 <sup>19,22,28,30,31,34,61</sup>. A single origin of ecotypes combined with high levels of gene flow between  
332 parapatric ecotypes at each locality can alter the phylogenetic relationships of populations,  
333 falsely suggesting multiple independent origins. This is because genetic structure at neutral  
334 markers can be decoupled from colonization history via introgression and incomplete lineage  
335 sorting<sup>16,25-27</sup>. This needs careful scrutiny in our system as previous work showed that  
336 genomic divergence was more heterogenous in parapatric populations compared to allopatric  
337 populations<sup>41</sup>, a signature of divergence with gene flow<sup>62,63</sup>. However, this pattern can also  
338 arise due to ancestral polymorphism and incomplete lineage sorting if parapatric populations

339 are younger than allopatric<sup>64</sup>, which our current work shows. Thus, processes unrelated to  
340 divergence in the face of high levels of gene flow could have also contributed to the patterns  
341 of genomic divergence in this system<sup>41</sup>.

342 To help understand the role of gene flow during parapatric divergence in *S. lautus*, we first  
343 directly estimated rates of gene flow within *fastsimcoal2*. Unexpectedly, we observed  
344 minimal levels of gene flow within parapatric *S. lautus* Dune-Headland pairs. This reveals  
345 that previous patterns of genomic divergence among these populations<sup>41</sup> likely reflect a  
346 signature of increased genome-wide differentiation over time in allopatry, and incomplete  
347 lineage sorting in parapatric populations rather than heterogeneous divergence in the face of  
348 high levels of gene flow. Furthermore, we observed that most Dune-Headland levels of  
349 bidirectional gene flow were similar to populations from different clades and separated by  
350 >1,500km, suggesting that most Dune and Headland populations at each locality could be  
351 viewed as effectively allopatric. Although unmodelled changes in population size tend to  
352 favor secondary contact models of gene flow<sup>57</sup>, our estimated migration rates were  
353 consistently very low across all models of gene flow (see Supplementary Table S4 for  
354 details) with the notable exceptions of D04-H05 and D32-H12 pairs. These populations  
355 experience levels of gene flow that would make them genetically undistinguishable ( $2Nm >$   
356  $1.00$ )<sup>65</sup>. Thus, it is still possible that gene flow has altered the observed phylogenetic topology  
357 for these populations.

358 We therefore explored the conditions which are likely to obscure the history of colonization  
359 by modelling the neutral divergence process through coalescent analyses. We observed that  
360 the likelihood of phylogenetic distortion is accentuated with very short internal branches,  
361 which are expected to carry high levels of ancestral polymorphism and therefore increase the  
362 probability that true sister taxa do not remain monophyletic; this effect is largely independent  
363 of migration rates as gene flow will not contribute more to population similarity beyond to  
364 what ancestral polymorphism already does. Short internal branches are frequently detected in  
365 systems where diversification occurs rapidly, such as in cases of adaptive radiations<sup>66</sup>, which  
366 seems to be the case in *S. lautus*. Our theoretical approach also reveals that increasing levels  
367 of gene flow increases the likelihood of phylogenetic distortion, especially when the time of  
368 migration is further from the population split. This is because when  $tI - tm$  is long, there is  
369 more time for a coalescent event to occur that produces a topology different from the true  
370 species tree. More importantly, in these cases of secondary contact, quite high levels of

371 migration are required to create the appearance of multiple origins. Although conventional  
372 thinking highlights that even small amounts of gene flow have the potential to mix  
373 populations and erode their history (e.g., refs. <sup>25–27</sup>), our work suggests that this might not be  
374 true under all cases of secondary contact between diverged populations. As expected, our  
375 work reveals that it is important to consider the joint contributions of gene flow as well as  
376 ancestral polymorphism when inferring the likelihood of phylogenetic distortion.

377 Within *S. lautus*, even though the short internal branches and recent secondary contact have  
378 the potential to obscure the phylogeny and falsely suggest parallel evolution, this is likely  
379 circumvented by the extremely low rates of gene flow between most parapatric ecotypes. In  
380 other words, it appears that higher amounts of gene flow would be needed to counteract the  
381 divergence that has accumulated over time in the *S. lautus* system. We must also note that our  
382 theoretical approach is conservative as we have ignored the effects of selection against  
383 introgressed alleles. We expect that linkage to loci underlying local adaptation should act to  
384 decrease the probability of a phylogeny topology switch at the locus considered. As such, a  
385 polygenic basis of local adaptation could greatly reduce the probability of a topology switch  
386 due to gene flow. Overall, when considering our theoretical work in combination with  
387 patterns of gene flow and genetic structure in the system, there is strong evidence that *S.*  
388 *lautus* populations have evolved multiple independent times. Below we outline other lines of  
389 evidence from our empirical work that support this assertion.

390 First, further evidence that gene flow has not obscured a single origin scenario in *S. lautus*  
391 comes from comparing joint estimates of gene flow and divergence times (as implemented in  
392 isolation with migration models) between population pairs of the same ecotype and putative  
393 sister populations of divergent ecotypes. We observed that populations of the same ecotype  
394 consistently show deeper divergence times than those from different ecotypes, which reflects  
395 the topology of the phylogeny estimated in the absence of gene flow. In addition,  
396 constructing the phylogeny considering gene flow (in *TreeMix*) did not alter the topology  
397 from its estimation in the absence of gene flow. Although the divergences at two localities  
398 (D04-H05 and D32-H12) experience levels of gene flow high enough to potentially result in  
399 phylogenetic distortion, their levels of differentiation are rather high. Furthermore, each of  
400 these pairs is from a separate clade and are genetically isolated from other such pairs, so even  
401 moderate levels of gene flow within each pair would not have distorted the phylogeny across  
402 the entire system. Even if we treat the divergences at these two localities (D04-H05 and D32-

403 H12) with some caution, transplant experiments within D04-H05 and other population  
404 pairs<sup>40,45-49</sup> have revealed strong extrinsic reproductive isolation, suggesting the barrier to  
405 gene flow is very strong between parapatric ecotypes. Together, these results also imply that  
406 phylogenetic distortion is highly unlikely in *S. lautus* and that such relationships reflect the  
407 true history of populations and ecotypes.

408 Additional support for the parallel evolution of *S. lautus* populations comes when considering  
409 our results in combination with previous work. Even if gene flow was high enough to distort  
410 the phylogeny across multiple populations, the clear association between environment and  
411 phenotype in the system in both common garden<sup>51</sup> and field conditions<sup>50</sup> as well as the strong  
412 divergent selection within each population pair<sup>40,45-49</sup>, suggests that natural selection may  
413 have independently resisted the introduction of maladaptive alleles across parapatric  
414 populations. Similar phenotypes across replicate populations have also arisen via mutations  
415 in different genes<sup>49,50,67</sup>, indicating that natural selection has necessarily acted independently  
416 within each population to drive the evolution of similar phenotypes. This adds further  
417 strength to our argument that observed levels of gene flow in *S. lautus* are not strong enough  
418 to obscure the historical relationships of populations. Overall, our results indicate that Dune  
419 and Headland populations have originated multiple independent times in parapatry with  
420 limited levels of gene flow which makes *S. lautus* a highly replicated system of parapatric  
421 divergences.

422 The *S. lautus* system allows us to study the deterministic nature of parallel evolution in  
423 multiple ways. For instance, we can now begin to understand how genetic architectures vary  
424 and evolve during adaptation. In doing so, researchers can then demonstrate whether alleles,  
425 genes or pathways have been repeatedly selected for across replicate populations<sup>24,68</sup>. This  
426 will also help us understand whether adaptation arises from new mutations or standing  
427 genetic variation (e.g., ref. <sup>68</sup>), or from fixation of functionally equivalent alleles (such as  
428 during polygenic adaptation<sup>38,39,69</sup>), or loss-of-function mutations (e.g., ref. <sup>35</sup>). Once adaptive  
429 genes have been identified, studies of parallel evolution should directly link the adaptive loci  
430 to phenotypic traits and further demonstrate that the traits themselves have been under  
431 repeated selection in independent populations<sup>70-72</sup>. In systems where this is not feasible, our  
432 study demonstrates that studying genome-wide loci can uncover patterns of phylogeography  
433 and migration that are consistent with parallel evolution.

434 Finally, in our work we have unusual high power to detect gene flow, as the number of  
435 individuals sequenced in each population is large ( $N_{\text{mean}} = 57$ ,  $2N_{\text{mean}} > 100$  chromosomes per  
436 population). This sampling regime allowed us to sample many rare variants and therefore  
437 better distinguish ancestral polymorphism from migration. Studies undertaking demographic  
438 modelling often sample 10-25 individuals per population (e.g., refs. <sup>22,73,74</sup>) and occasionally  
439 even less than 10 (e.g., ref. <sup>28</sup>). Thus these studies cannot easily distinguish shared variants  
440 due to gene flow from ancestral polymorphism, which can make results biased to detecting  
441 moderate to high levels of gene flow, especially for recently diverged populations and in  
442 underpowered studies<sup>64,75-77</sup>. As our coalescent modelling reveals that little gene flow can  
443 obscure a phylogenetic topology under certain conditions (e.g., during very young adaptive  
444 radiations), studies that fail to detect gene flow with many numbers of individuals and loci  
445 can treat results with confidence.

446 Overall, we provide strong evidence for multiple origins of parapatric Dune and Headland  
447 populations within *S. lautus*. Across this highly replicated system we observed phylogenetic  
448 clustering by geography, strong genetic structure between populations, isolation by distance,  
449 and surprisingly low gene flow between parapatric populations at each locality as well as the  
450 system as a whole. Coalescent modelling confirmed that levels of gene flow are likely not  
451 high enough to obscure a single origin scenario. Furthermore, the phylogenetic relationships  
452 of populations estimated in the presence of gene flow agree with the main phylogeny, which  
453 supports a multiple origin scenario. These results from our current work in combination with  
454 strong divergent selection between ecotypes<sup>40,45-49</sup>, strong trait-environment association in  
455 the system<sup>50,51</sup> and adaptation across replicate populations occurring mainly via mutations in  
456 different genes<sup>49,50,67</sup>, implies that selection has independently driven the parallel evolution of  
457 populations. This makes *S. lautus* one of the clearest examples of the parallel evolution of  
458 ecotypes discovered yet, adding to the increasing number of potential cases of parallel  
459 evolution in plants<sup>22,78-80</sup>. It also positions the species as a powerful system of replicated  
460 parapatric divergence to study the origin of adaptations and reproductive isolation.

## 461 **Methods**

### 462 **Sample collection and DNA extraction**

463 Leaf samples for DNA extraction were collected from 23 Dune and Headland populations of  
464 *Senecio lautus* along the coast of Australia, which included eight parapatric Dune-Headland

465 population pairs, three allopatric Headland populations, and three allopatric Dune populations  
466 ( $n_{\text{mean}} = 58$ ,  $n_{\text{total}} = 1338$ ; Fig. 2A, Supplementary Table S5). We sampled mature (flowering)  
467 plants evenly across the geographic range of each population, ensuring that sampled plants  
468 were at least one meter apart. DNA was extracted using a modified CTAB protocol<sup>81</sup> and  
469 cleaned with Epoch Life Sciences spin columns. We quantified sample concentration with the  
470 Invitrogen Quant-iT PicoGreen dsDNA Assay Kit, and used the BioTek Take3 Micro-  
471 Volume Plate to ensure DNA samples were pure. Samples were standardized to 10ng/uL.

## 472 **GBS library construction**

473 We created reduced representation libraries to obtain restriction site associated DNA (RAD)  
474 markers. Specifically, we used a two-enzyme Genotyping-by-Sequencing (GBS) approach  
475 (modified from ref. <sup>82</sup>). We created seven libraries from the 23 Dune and Headland  
476 populations, each containing 192 barcoded individuals. For each individual, genomic DNA  
477 was digested with the restriction enzymes Pst1-HF (New England Biosciences; NEB) and  
478 Msp1 (NEB). Forward and reverse barcodes were ligated to fragments from each sample, and  
479 subsequently cleaned with homemade Serapure beads<sup>83,84</sup>. For each sample we amplified the  
480 fragments and added Illumina sequencing primers via PCRs. Each sample was quantified  
481 with the Invitrogen Quant-iT PicoGreen dsDNA Assay Kit. We created seven equimolar  
482 pools (192 individuals per pool), ensuring each population was evenly distributed across the  
483 pools. Each pool was size-selected on the BluePippin (2% DF Marker V1, 300-500bp; Sage  
484 Science), and cleaned with the Monarch PCR & DNA cleanup kit (NEB). Pooled libraries  
485 were sent to Beijing Genomics Institute for sequencing on seven lanes of the HiSeq4000,  
486 with 100bp paired-end sequencing.

## 487 **Bioinformatics**

488 The Beijing Genomics Institute removed forward barcodes and quality filtered the raw reads  
489 to remove reads containing Illumina adaptors, low quality reads ( $> 50\%$  of bases  $< Q10$ ), and  
490 reads with  $> 10\%$  Ns. We trimmed reverse barcodes with *TagCleaner* standalone v0.12<sup>85</sup>. We  
491 retained an average of 2,849,159 clean reads (SD = 827,036) across the 1,319 individuals  
492 (after the removal of 19 individuals with high missing data, see below; Supplementary Table  
493 S6). Reads were mapped to the *S. lautus* reference PacBio genome v1.0<sup>49</sup> with *BWA-MEM*  
494 v0.7.15<sup>86,87</sup>. On average, 86% of reads (SD = 15) mapped to the reference genome, and 81%  
495 (SD = 15) mapped properly with their paired-read (Supplementary Table S6). *PicardTools*



496 v2.7.0<sup>88</sup> was used to clean aligned reads and to add read groups (PCR duplicates were not  
497 marked for removal). We jointly called all variant and invariant sites for each population with  
498 *FreeBayes* v1.1.0<sup>89</sup>. Because SNPs were separately called for each of the 23 populations, we  
499 first normalized the 23 VCF files before merging them together. This was achieved by first  
500 using *BCFtools* v1.4.1<sup>90</sup> to split multiallelic sites into biallelic records. Each file was then  
501 normalized by re-joining biallelic sites into multiallelic records. We then left-aligned and  
502 normalized indels, and used *vt*<sup>91</sup> to decompose biallelic block substitutions into separate  
503 SNPs for each population. We then merged the 23 per-population VCF files into one large  
504 file for subsequent SNP filtering.

505 We largely followed the *dDocent* pipeline for SNP filtering<sup>92,93</sup>, including iterative filtering to  
506 maximize the number of sampled SNPs<sup>94</sup>. Using *VCFtools* v0.1.15<sup>95</sup>, we first retained sites if  
507 they were present in > 50% of individuals, had a minimum quality score of 30, and a  
508 minimum minor allele count of 1. We then filtered for a minimum depth of 3 for a genotype  
509 call. Individuals were removed if they contained > 40% missing data. We then filtered for a  
510 maximum mean depth of 100, and a minimum mean depth of 10. We filtered for missing data  
511 per population, removing sites if they contained > 50% of missing data within each  
512 population. We refiltered for an overall missing data of 20%. Indels were removed with  
513 *vcflib*<sup>96</sup>. We then filtered for population-specific Hardy Weinberg Equilibrium using the  
514 *filter\_hwe\_by\_pop.pl* script within *dDocent*. See below for the minor allele frequency  
515 thresholds for each analysis.

## 516 **Do populations cluster by geography or ecotype?**

517 To explore the broad patterns of genetic clustering of populations, we performed two separate  
518 analyses: phylogeny construction and *fastSTRUCTURE*<sup>97</sup>. We used *PLINK* v1.9<sup>98</sup> to filter for  
519 a minor allele frequency of 0.05 and also to thin SNPs by retaining one unlinked SNP per  
520 RAD locus. This dataset contained 3,844 unlinked SNPs across the 1,319 individuals. We  
521 generated a maximum likelihood phylogeny within *IQ-TREE* v1.6.0<sup>99</sup> using the  
522 polymorphisms-aware phylogenetic model<sup>100</sup>. We first used *ModelFinder*<sup>101</sup> to determine the  
523 best-fit substitution model for the data (TVMe+FQ+P+N9+G4), and increased the virtual  
524 population size (N) to the maximum value of 19 (as recommended by ref. <sup>100</sup>). Default  
525 parameters were used for tree construction, with the western Australia D09 population  
526 assigned as the outgroup. To assess convergence, we undertook 10 separate runs of *IQ-TREE*  
527 and examined tree topology (which remained unchanged with 10 independent runs). We also

528 ensured that the log-likelihood values were stable at the end of each run. Branch support was  
529 performed using 10,000 replicates of UFboot<sup>102</sup>, and 10,000 replicates of SH-aLRT<sup>103</sup>.

530 We further explored broad patterns of population structure using the variational Bayesian  
531 framework, *fastSTRUCTURE* v1.0<sup>97</sup>. Here, we implement *fastSTRUCTURE* as extra evidence  
532 for whether populations genetically cluster by geography or ecotype. We did not infer  
533 specific historical admixture scenarios from *fastSTRUCTURE*, as different demographic  
534 scenarios can give rise to indistinguishable structure plots<sup>52</sup>. The *fastSTRUCTURE* algorithm  
535 assigns individuals into genetic clusters (K) by minimizing departures from Hardy-Weinberg  
536 equilibrium and inferring individual ancestry proportions to each genetic cluster. We  
537 followed the recommendations by refs. <sup>104,105</sup>. We ran the simple prior (K=1-30) with 100  
538 independent runs per K-value. In order to determine the most likely number of genetic  
539 clusters (the optimal K), we used the *chooseK.py* script from *fastSTRUCTURE* to examine (1)  
540 the K-value that best explained the structure in the data (the smallest number of model  
541 components that accounted for almost all of the ancestry in the sample), and (2) the K-value  
542 that maximized the marginal likelihood of the data. Results were summarized and plotted in  
543 the R package *pophelper* v2.2.7<sup>106</sup>.

#### 544 **Has gene flow shaped patterns of divergence across the system?**

545 To explore patterns of gene flow in a phylogenetic context, we used *TreeMix* v1.13<sup>55</sup>.  
546 *TreeMix* constructs a bifurcating maximum likelihood tree, identifies populations that are  
547 poor fits to the model, and sequentially adds migration events that improve the fit of the data.  
548 We filtered our data for MAF 0.01, retaining 24,933 SNPs across the 1,319 individuals. We  
549 constructed an initial 25 maximum likelihood trees with no migration, 1,000 bootstrap  
550 replicates in blocks of 50 SNPs with D09 as the assigned outgroup, and selected the tree with  
551 the highest log-likelihood as the input tree for all subsequent analyses. We then tested  
552 between 1-25 migration events in blocks of 50 SNPs. Trees and migration events were robust  
553 to varying the size of the linkage blocks as well as the MAF threshold of the dataset (data not  
554 shown). To select the number of migration events, we examined the log-likelihoods and  
555 cumulative variance explained by each model, as well as performed jackknife estimates to  
556 obtain the standard error and significance of the weight of each migration event. However,  
557 the interpretation of these P-values should be treated with caution due to possible errors in the  
558 tree structure as well as the inference of incorrect migration events<sup>55</sup>.

559 To more formally test for admixture, we used the *threepop* function in *TreeMix* to calculate  
560  $f_3$ -statistics<sup>107</sup>. The  $f_3$ -statistic determines whether a particular population ( $A$ ) is the result of  
561 admixture between two other populations ( $B$  and  $C$ ). It measures the difference in allele  
562 frequencies between populations  $A$  and  $B$ , and populations  $A$  and  $C$ . Only when admixture is  
563 present, we expect the allele frequency of population  $A$  to be intermediate between the allele  
564 frequencies of populations  $B$  and  $C$ . In contrast, in the absence of gene flow, population  $A$   
565 allele frequency should not be consistently intermediate between  $B$  and  $C$ . Therefore,  $f_3$  can  
566 be interpreted as the amount of shared genetic drift between two populations from a common  
567 ancestor. In the absence of admixture,  $f_3(A; B, C)$  will be positive, whereas a significantly  
568 negative value of  $f_3$  provides evidence for  $A$  being admixed from  $B$  and  $C$ . We calculated  $f_3$   
569 for all triads of populations with jackknifing in blocks of 50 SNPs to obtain Z-scores for  
570 calculating statistical significance ( $Z\text{-score} < -3.8 = P < 0.0001$ ).

571 The erect phenotype is common across Australian species of the genus *Senecio*<sup>43</sup>, except for  
572 the prostrate *S. lautus* Headland ecotype and a few Alpine populations, suggesting these  
573 prostrate forms are derived. We tested for isolation by distance (IBD<sup>23</sup>) in the ancestral and  
574 derived ecotypes to evaluate similarities in their dispersal dynamics<sup>58</sup>. We tested for IBD  
575 using migration rates ( $2Nm$ ) inferred in *fastsimcoal2* (see below) as well as Slatkin's  $\hat{M}$ ,  $(1 /$   
576  $F_{ST} - 1)/4$ , as a proxy for gene flow<sup>58</sup>. For Slatkin's  $\hat{M}$ , we excluded the western Australia  
577 populations (D09 and D35), filtered for a MAF of 0.05, and calculated pairwise  $F_{ST}$  in  
578 VCFtools. We calculated pairwise geographic distances using the following formula, which  
579 uses the spherical law of cosines to consider the curvature of the earth:  
580  $6378137 * \text{acos}(\sin(\text{lat}_1) * \sin(\text{lat}_2) + \cos(\text{lat}_1) * \cos(\text{lat}_2) * \cos(\text{long}_1 - \text{long}_2))$ , where 6378137 is  
581 earth's radius in meters, and  $\text{lat}$  and  $\text{long}$  are the latitude and longitude (in radians) of the two  
582 populations compared. For the *fastsimcoal2* migration rates, we tested for IBD between the  
583 Dune and Headland of each population pair using a linear model in R v3.4.2<sup>108</sup>, using an  
584 average of the bidirectional gene flow rates for each pair (log-log scale). For Slatkin's  $\hat{M}$ , we  
585 also tested for IBD between the Dune and Headland of each population pair (log-log scale)  
586 using a linear model in R, and tested for IBD within the Dunes, and within the Headlands  
587 (log-log scale) using Mantel tests with 9,999 permutations in R (*mantel* function in the *vegan*  
588 package<sup>109</sup>).

## 589 **Is there gene flow between parapatric populations?**

590 We examined levels of admixture between parapatric populations with *STRUCTURE*  
591 v2.3.4<sup>55</sup>. *STRUCTURE* is a Bayesian MCMC approach that assigns populations into genetic  
592 clusters (K) based on individual genotypes by assuming Hardy-Weinberg Equilibrium within  
593 a population. It assigns each individual an admixture coefficient to depict the proportion of  
594 the genome that originated from a particular K cluster. To increase the numbers of SNPs, we  
595 took a subset of the data by excluding the two populations from the west coast of Australia  
596 (D09 and D35). Excluding these most divergent populations decreased the amount of missing  
597 data and thus increased the number of common SNPs in the south-eastern populations. We  
598 used the same filtering procedure as above, filtered for MAF 0.05 and thinned SNPs in  
599 *PLINK* to retain one SNP per RAD locus. Each population pair was extracted and  
600 subsequently filtered for MAF 0.05. We retained between 837 and 2,606 unlinked SNPs per  
601 pair (mean = 1,905 SNPs; SD = 575). *STRUCTURE* analysis was run using the admixture  
602 model and the correlated allele frequency model<sup>110</sup> with 10 independent runs for K=1-6  
603 (50,000 burn-in and 200,000 MCMC). We ensured convergence of all summary statistics. As  
604 we were specifically interested in detecting admixed individuals between the two ecotypes,  
605 we plot results for K=2. To explore any additional genetic structure within a pair, we also  
606 estimated the optimal K-value with the Evanno method<sup>56</sup>, by examining the maximum value  
607 for  $\Delta K$  (the second order rate of change in the log probability of data between successive K-  
608 values). The R package *pophelper* was used to calculate the  $\Delta K$ , summarize results and plot  
609 the data.

610 We directly estimated levels of gene flow between population pairs from the site frequency  
611 spectrum (SFS) using the composite-likelihood method implemented in *fastsimcoal2*  
612 v2.6.0.3<sup>111</sup>. The joint SFS of two populations is sensitive to demographic processes. For  
613 instance, gene flow will result in more low-frequency shared polymorphisms than expected  
614 under a non-migration scenario<sup>112</sup>. We tested eight demographic models (Fig. 4A), and  
615 inferred migration rates, as well as other demographic parameters including current  
616 population sizes, ancestral population size, divergence time, time of secondary contact, and  
617 gene flow cessation time, for eight Dune-Headland (DH) population pairs. We additionally  
618 asked whether gene flow was occurring in a linear fashion down the coast within each  
619 ecotype by testing eight Dune-Dune (DD) and eleven Headland-Headland (HH) pairs. To  
620 determine the baseline level of gene flow inferred by *fastsimcoal2* between isolated

621 populations, namely the null gene flow expectation, we estimated migration rates for three  
622 very divergent allopatric populations (>1,500km apart, between the eastern and south-eastern  
623 clades; D03-D32, D03-H12, and H02-H12), and took the highest detected migration rate  
624 from these allopatric comparisons as the baseline migration rate.

625 As above, the western Australia populations (D09 and D35) were excluded from this dataset  
626 to increase the number of sampled SNPs. For each pair, we filtered for a minor allele count of  
627 one (MAC1), retaining between 6,679 and 19,951 variable sites per pair (mean = 12,155  
628 SNPs, SD = 3,316). By using a MAC1 and a relatively high number of samples per  
629 population (mean = 57, SD = 15), we retained rare alleles that are informative about  
630 migration events between the populations<sup>75</sup>. Since we cannot distinguish ancestral from  
631 derived alleles, we used the minor allele SFS (folded SFS). We used an *ad hoc* approach to  
632 estimate the number of monomorphic sites (see Supplementary Methods section “Estimation  
633 of monomorphic sites per pair”). Gene flow estimates were robust to varying the number of  
634 monomorphic sites (data not shown). We used custom R functions (modified from ref. <sup>113</sup>) to  
635 generate the joint folded SFS per population pair without downsampling. See Supplementary  
636 Table S4 for details on the number of SNPs, number of monomorphic sites and models tested  
637 for each pair comparison.

638 We performed 50 independent *fastsimcoal2* runs per model per population pair. Each run  
639 consisted of 100,000 coalescent simulations and 40 expectation-maximization cycles for  
640 parameter optimization. We used a mutation rate of  $1.0 \times 10^{-8}$  based on Asteraceae EST  
641 sequence comparisons and fossil calibrations<sup>114</sup>. We ranked the models based on the  
642 Kullback–Leibler information value which was estimated from the AIC scores of the best run  
643 per model. Here, the normalization of the difference between the AIC scores of a particular  
644 model and the best model in the set provides a measure of the degree of support for a  
645 particular model, namely model likelihood ( $w_i$ )<sup>115</sup>. Since the use of linked-SNPs might lead to  
646 pseudo-replication issues when comparing models based on *fastsimcoal2* likelihood values<sup>116</sup>  
647 and the SFS discards linkage information, we verified SNPs were largely unlinked by  
648 calculating linkage-disequilibrium in PLINK (data not shown).

649 As *fastsimcoal2* uses simulations to approximate the likelihood values, there is variance in  
650 the likelihood estimates. To test whether the best model significantly differs from alternative  
651 models with negligible gene flow ( $2Nm = 0.01$ ) but the same values at other parameters, we  
652 compared their likelihood distributions based on 100 expected SFS from 100,000 coalescent

653 simulations per model<sup>116</sup>. If likelihood distributions overlap, there is no significant  
654 differences between the fit of both models<sup>28</sup>. To obtain confidence intervals for all  
655 demographic parameters, we performed parametric bootstrapping. Given the parameter  
656 values of the best run of the best model, we simulated 100 SFS and re-estimated the  
657 parameter values from them. Each run consisted of 100,000 coalescent simulations and 30  
658 expectation-maximization cycles. The parameter values of the best run of the best model  
659 were specified as initial values of each bootstrapping run. We computed the 95% confidence  
660 intervals of all parameters with the *groupwiseMean* function of *rcompanion* R package<sup>117</sup>.

### 661 **Is gene flow high enough to obscure a single origin scenario?**

662 To better understand under what conditions gene flow can erode a signal of phylogenetic  
663 monophyly of each ecotype, we created a coalescent model to represent a single origin  
664 scenario of ecotypes (see Supplementary Methods section “Probabilities of gene flow  
665 distorting phylogeny topology” for full details). We assumed a species tree consisting of four  
666 populations, with two sets of sister taxa to represent populations of the same ecotype (Fig.  
667 5A). The ancestor of the ecotypes splits at time  $t_2$  in the past, and we can think of this split as  
668 an initial single origin of the Dune and Headland ecotypes. To represent two parapatric  
669 population pairs, each of these two ecotypes further split simultaneously at time  $t_1$  in the past.  
670 We considered an instantaneous burst of migration from the ancestral ecotype populations  
671 into the derived ecotype populations at each locality by assuming that a fraction  $m$  of alleles  
672 in each derived ecotype population (10%) is replaced by migrant alleles from a parapatric  
673 population at time  $tm$  in the past (50,000 generations ago). We then considered sampling an  
674 allele from each of the four populations at the present, and conditioned on the migrant status  
675 of the sampled alleles to calculate coalescent probabilities of gene tree topologies that result  
676 in a grouping in which the two populations of the derived ecotype do not appear as sister taxa  
677 in the gene genealogy. These methods recapitulate recent more formal treatments of the  
678 probability of hemiplasy (non-monophyly despite a single evolutionary origin) under  
679 incomplete lineage sorting and introgression<sup>118,119</sup>, though we have considered a scenario  
680 involving four populations to reflect the nature of parapatric pairs. Moreover, our emphasis is  
681 placed on the implications of gene flow for the original inference of the species tree itself,  
682 rather than how it pertains to the history of a selected locus of interest under an inferred  
683 phylogeny.

684 Finally, although we cannot directly map where our observed data fall in the simulated  
685 parameter space, we can gain further confidence on the likelihood of phylogenetic distortion  
686 by considering divergence time estimates from *fastsimcoal2* in combination with the  
687 phylogenetic topology estimated in *IQ-TREE*. More specifically, we asked whether  
688 divergence times between populations from the same ecotype are deeper than between  
689 populations from different ecotypes. The estimation of divergence times in *fastsimcoal2*  
690 considers gene flow, thus if they are in accordance with relative node order of the *IQ-TREE*  
691 phylogeny (which is estimated without accounting for gene flow), it suggests that  
692 phylogenetic distortion within the system is unlikely. We thus compared the *fastsimcoal2*  
693 divergence times to the relative node order of the *IQ-TREE* phylogeny for four population  
694 pairs (D04-H05 and D05-H06; D14-H15 and D32-H12). We selected these pairs because  
695 they represent neighboring sister-taxa within the phylogeny.

## 696 **Acknowledgements**

697 We are grateful to M.J. Wilkinson, H.N. Nguyen Vu and H.L. North for assisting with  
698 sample collection. We extend our thanks to R.K. Bagley for assisting with *fastsimcoal2*. We  
699 thank Ortiz-Barrientos laboratory members for insightful comments on previous versions of  
700 this manuscript. S. Chenoweth and M. Blows provided very useful feedback on M.E. James'  
701 PhD dissertation. This work was funded by an Australian Research Council grant  
702 (DP190103039) to D.O. and J.E., and a University of Queensland Graduate School  
703 International Travel Award to M.E.J.

## 704 **Author contributions**

705 M.E.J and D.O. conceived the project. M.E.J. and J.E. undertook sample collection. M.E.J.  
706 extracted DNA, prepared libraries, performed bioinformatics, and undertook the *IQ-TREE*,  
707 *fastSTRUCTURE*, *STRUCTURE* and *TreeMix* analyses. H.A. conducted the *fastsimcoal2*  
708 analyses. J.S.G. performed the coalescent modelling with input from J.E. The paper was  
709 written by M.E.J. and D.O. with input from all authors. D.O. is the mentor and supervisor for  
710 the research program.

## 711 **Competing interests**

712 The authors declare no competing interests.

713 **Data availability**

714 Data will be uploaded to Dryad upon acceptance of the manuscript.



## References

1. Schluter, D. & Nagel, L. M. Parallel speciation by natural selection. *Am. Nat.* **146**, 292–301 (1995).
2. Berglund, A. B. N., Dahlgren, S. & Westerbergh, A. Evidence for parallel evolution and site-specific selection of serpentine tolerance in *Cerastium alpinum* during the colonization of Scandinavia. *New Phytol.* **161**, 199–209 (2003).
3. Johannesson, K. *et al.* Repeated evolution of reproductive isolation in a marine snail: unveiling mechanisms of speciation. *Philos. Trans. R. Soc. B* **365**, 1735–1747 (2010).
4. Elmer, K. R., Kusche, H., Lehtonen, T. K. & Meyer, A. Local variation and parallel evolution: morphological and genetic diversity across a species complex of neotropical crater lake cichlid fishes. *Philos. Trans. R. Soc. B* **365**, 1763–1782 (2010).
5. Ravinet, M., Prodöhl, P. A. & Harrod, C. Parallel and nonparallel ecological, morphological and genetic divergence in lake-stream stickleback from a single catchment. *J. Evol. Biol.* **26**, 186–204 (2013).
6. Perreault-Payette, A. *et al.* Investigating the extent of parallelism in morphological and genomic divergence among lake trout ecotypes in Lake Superior. *Mol. Ecol.* **26**, 1477–1497 (2017).
7. York, R. A. & Fernald, R. D. The repeated evolution of behavior. *Front. Ecol. Evol.* **4**, 143 (2017).
8. Smith, S. D. & Rausher, M. D. Gene loss and parallel evolution contribute to species difference in flower color. *Mol. Biol. Evol.* **28**, 2799–2810 (2011).
9. Orr, H. A. The probability of parallel evolution. *Evolution* **59**, 216–220 (2005).
10. Stern, D. L. & Orgogozo, V. Is genetic evolution predictable? *Science* **323**, 746–751 (2009).
11. Lenormand, T., Chevin, L. M. & Bataillon, T. Parallel evolution: what does it (not) tell us and why is it (still) interesting? in *Chance in Evolution* (University Chicago Press, Chicago, 2016).
12. Stoltzfus, A. & McCandlish, D. M. Mutational biases influence parallel adaptation. *Mol. Biol. Evol.* **34**, 2163–2172 (2017).
13. Yeaman, S., Gerstein, A. C., Hodgins, K. A. & Whitlock, M. C. Quantifying how constraints limit the diversity of viable routes to adaptation. *PLoS Genet.* **14**, e1007717 (2018).

14. Rosenblum, E. B., Parent, C. E. & Brandt, E. E. The molecular basis of phenotypic convergence. *Annu. Rev. Ecol. Evol. Syst.* **45**, 203–226 (2014).
15. Blount, Z. D., Lenski, R. E. & Losos, J. B. Contingency and determinism in evolution: Replaying life’s tape. *Science* **362**, eaam5979 (2018).
16. Bierne, N., Gagnaire, P. A. & David, P. The geography of introgression in a patchy environment and the thorn in the side of ecological speciation. *Curr. Zool.* **59**, 72–86 (2013).
17. Quesada, H., Posada, D., Caballero, A., Morán, P. & Rolán-Alvarez, E. Phylogenetic evidence for multiple sympatric ecological diversification in a marine snail. *Evolution* **61**, 1600–1612 (2007).
18. Butlin, R. K. *et al.* Parallel evolution of local adaptation and reproductive isolation in the face of gene flow. *Evolution* **68**, 935–949 (2014).
19. Pérez-Pereira, N., Quesada, H. & Caballero, A. Can parallel ecological speciation be detected with phylogenetic analyses? *Mol. Phylogenet. Evol.* **116**, 149–156 (2017).
20. Ostevik, K. L., Moyers, B. T., Owens, G. L. & Rieseberg, L. H. Parallel ecological speciation in plants? *Int. J. Ecol.* **2012**, 1–17 (2012).
21. Allender, C. J., Seehausen, O., Knight, M. E., Turner, G. F. & Maclean, N. Divergent selection during speciation of Lake Malawi cichlid fishes inferred from parallel radiations in nuptial coloration. *PNAS* **100**, 14074–14079 (2003).
22. Trucchi, E., Frajman, B., Haverkamp, T. H. A., Schönswetter, P. & Paun, O. Genomic analyses suggest parallel ecological divergence in *Heliosperma pusillum* (Caryophyllaceae). *New Phytol.* **216**, 267–278 (2017).
23. Wright, S. Isolation by distance. *Genetics* **28**, 114–138 (1943).
24. Lee, K. M. & Coop, G. Population genomics perspectives on convergent adaptation. *Philos. Trans. R. Soc. B* **374**, 20180236 (2019).
25. Coyne, J. A. & Orr, H. A. *Speciation*. (Sinauer Associates, Sunderland, 2004).
26. Barton, N. H. & Hewitt, G. M. Analysis of hybrid zones. *Annu. Rev. Ecol. Syst.* **16**, 113–148 (1985).
27. Endler, J. *Geographic variation, speciation, and clines*. (Princeton University Press, Princeton, 1977).
28. Meier, J. I. *et al.* Demographic modelling with whole-genome data reveals parallel origin of similar *Pundamilia* cichlid species after hybridization. *Mol. Ecol.* **26**, 123–141 (2017).

29. Magalhaes, I. S. *et al.* Intercontinental genomic parallelism in multiple adaptive radiations. Preprint at <https://doi.org/10.1101/856344>. (2019) doi:10.1101/856344.
30. Le Moan, A., Gagnaire, P. A. & Bonhomme, F. Parallel genetic divergence among coastal-marine ecotype pairs of European anchovy explained by differential introgression after secondary contact. *Mol. Ecol.* **25**, 3187–3202 (2016).
31. Rougemont, Q. *et al.* Low reproductive isolation and highly variable levels of gene flow reveal limited progress towards speciation between European river and brook lampreys. *J. Evol. Biol.* **28**, 2248–2263 (2015).
32. Herman, A. *et al.* The role of gene flow in rapid and repeated evolution of cave-related traits in Mexican tetra, *Astyanax mexicanus*. *Mol. Ecol.* **27**, 4397–4416 (2018).
33. Rougeux, C., Bernatchez, L. & Gagnaire, P. A. Modeling the multiple facets of speciation-with-gene-flow toward Inferring the divergence history of lake whitefish species pairs (*Coregonus clupeaformis*). *Genome Biol. Evol.* **9**, 2057–2074 (2017).
34. Rougeux, C., Gagnaire, P. A. & Bernatchez, L. Model-based demographic inference of introgression history in European whitefish species pairs'. *J. Evol. Biol.* **32**, 806–817 (2019).
35. Chan, Y. F. *et al.* Adaptive evolution of pelvic reduction in sticklebacks by recurrent deletion of a Pitx1 enhancer. *Science* **327**, 302–305 (2010).
36. Colosimo, P. F. *et al.* Widespread parallel evolution in sticklebacks by repeated fixation of Ectodysplasin alleles. *Science* **307**, 1928–1933 (2005).
37. Roesti, M., Gavrilets, S., Hendry, A. P., Salzburger, W. & Berner, D. The genomic signature of parallel adaptation from shared genetic variation. *Mol. Ecol.* **23**, 3944–3956 (2014).
38. Yeaman, S. Local adaptation by alleles of small effect. *Am. Nat.* **186**, S74–S89 (2015).
39. Tiffin, P. & Ross-Ibarra, J. Advances and limits of using population genetics to understand local adaptation. *Trends Ecol. Evol.* **29**, 673–680 (2014).
40. Melo, M. C., Grealy, A., Brittain, B., Walter, G. M. & Ortiz-Barrientos, D. Strong extrinsic reproductive isolation between parapatric populations of an Australian groundsel. *New Phytol.* **203**, 323–334 (2014).
41. Roda, F. *et al.* Genomic evidence for the parallel evolution of coastal forms in the *Senecio lautus* complex. *Mol. Ecol.* **22**, 2941–2952 (2013).
42. Radford, I. J., Cousens, R. D. & Michael, P. W. Morphological and genetic variation in the *Senecio pinnatifolius* complex: are variants worthy of taxonomic recognition? *Aust. Syst. Bot.* **17**, 29–48 (2004).

43. Thompson, I. R. Taxonomic studies of Australian *Senecio* (Asteraceae): 5. The *S. pinnatifolius*/*S. lautus* complex. *Muelleria* **21**, 23–76 (2005).
44. Ali, S. *Senecio lautus* complex in Australia. I. Taxonomic considerations and discussion of some of the related taxa from New Zealand. *Aust. J. Bot.* **12**, 282–291 (1964).
45. Walter, G. M. *et al.* Diversification across a heterogeneous landscape. *Evolution* **70**, 1979–1992 (2016).
46. Richards, T. J. & Ortiz-Barrientos, D. Immigrant inviability produces a strong barrier to gene flow between parapatric ecotypes of *Senecio lautus*. *Evolution* **70**, 1239–1248 (2016).
47. Richards, T. J., Walter, G. M., McGuigan, K. & Ortiz-Barrientos, D. Divergent natural selection drives the evolution of reproductive isolation in an Australian wildflower. *Evolution* **70**, 1993–2003 (2016).
48. Walter, G. M., Wilkinson, M. J., Aguirre, J. D., Blows, M. W. & Ortiz-Barrientos, D. Environmentally induced development costs underlie fitness tradeoffs. *Ecology* **99**, 1391–1401 (2018).
49. Wilkinson, M. J. *et al.* Divergence in hormone signaling drives local adaptation and intrinsic reproductive isolation. Preprint at <https://doi.org/10.1101/845354>. (2020).
50. James, M. E., Wilkinson, M. J., North, H. L., Engelstädter, J. & Ortiz-Barrientos, D. A framework to quantify phenotypic and genotypic parallel evolution. Preprint at <https://doi.org/10.1101/2020.02.05.936450>. (2020).
51. Walter, G. M., Aguirre, J. D., Blows, M. W. & Ortiz-Barrientos, D. Evolution of genetic variance during adaptive radiation. *Am. Nat.* **191**, E108–E128 (2018).
52. Lawson, D. J., van Dorp, L. & Falush, D. A tutorial on how not to over-interpret STRUCTURE and ADMIXTURE bar plots. *Nat. Commun.* **9**, 3258 (2018).
53. Pritchard, J. K., Stephens, M. & Donnelly, P. Inference of population structure using multilocus genotype data. *Genetics* **155**, 945–959 (2000).
54. Melo, M. C. *et al.* Evidence for mutation-order speciation in an Australian wildflower. Preprint at <https://doi.org/10.1101/692673>. (2019).
55. Pickrell, J. K. & Pritchard, J. K. Inference of population splits and mixtures from genome-wide allele frequency data. *PLoS Genet.* **8**, e1002967 (2012).
56. Evanno, G., Regnaut, S. & Goudet, J. Detecting the number of clusters of individuals using the software structure: a simulation study. *Mol. Ecol.* **14**, 2611–2620 (2005).

57. Momigliano, P., Florin, A.-B. & Merilä, J. Biases in demographic modelling affect our understanding of the process of speciation. Preprint at <https://doi.org/10.1101/2020.06.03.128298>. (2020) doi:10.1101/2020.06.03.128298.
58. Slatkin, M. Isolation by distance in equilibrium and non-equilibrium populations. *Evolution* **47**, 264–279 (1993).
59. Bank, C., Bürger, R. & Hermisson, J. The limits to parapatric speciation: Dobzhansky–Muller Incompatibilities in a continent–island model. *Genetics* **191**, 845–863 (2012).
60. Blanckaert, A. & Hermisson, J. The limits to parapatric speciation II: Strengthening a preexisting genetic barrier to gene flow in parapatry. *Genetics* **209**, 241–254 (2018).
61. Martin, C. H. *et al.* Complex histories of repeated gene flow in Cameroon crater lake cichlids cast doubt on one of the clearest examples of sympatric speciation. *Evolution* **69**, 1406–1422 (2015).
62. Feder, J. L. & Nosil, P. The efficacy of divergence hitchhiking in generating genomic islands during ecological speciation. *Evolution* **64**, 1729–1747 (2010).
63. Feder, J. L., Egan, S. P. & Nosil, P. The genomics of speciation-with-gene-flow. *Trends in Genetics* **28**, 342–350 (2012).
64. Cruickshank, T. E. & Hahn, M. W. Reanalysis suggests that genomic islands of speciation are due to reduced diversity, not reduced gene flow. *Mol. Ecol.* **23**, 3133–3157 (2014).
65. Slatkin, M. Gene flow in natural populations. *Annu. Rev. Ecol. Syst.* **16**, 393–430 (1985).
66. Schluter, D. *The ecology of adaptive radiation*. (Oxford University Press, Oxford, 2000).
67. Roda, F. *et al.* Convergence and divergence during the adaptation to similar environments by an Australian groundsel. *Evolution* **67**, 2515–2529 (2013).
68. Lee, K. M. & Coop, G. Distinguishing among modes of convergent adaptation using population genomic data. *Genetics* **207**, 1591–1619 (2017).
69. Berg, J. J. & Coop, G. A population genetic signal of polygenic adaptation. *PLoS Genet.* **10**, e1004412 (2014).
70. Storz, J. F. & Wheat, C. W. Integrating evolutionary and functional approaches to infer adaptation at specific loci. *Evolution* **64**, 2489–2509 (2010).
71. Pardo-Diaz, C., Salazar, C. & Jiggins, C. D. Towards the identification of the loci of adaptive evolution. *Methods Ecol. Evol.* **6**, 445–464 (2015).

72. Hoban, S. *et al.* Finding the genomic basis of local adaptation: pitfalls, practical solutions, and future directions. *Am. Nat.* **188**, 379–397 (2016).
73. Roesti, M., Kueng, B., Moser, D. & Berner, D. The genomics of ecological vicariance in threespine stickleback fish. *Nat. Commun.* **6**, 8767 (2015).
74. Kautt, A. F., Machado-Schiaffino, G. & Meyer, A. Multispecies outcomes of sympatric speciation after admixture with the source population in two radiations of Nicaraguan crater lake cichlids. *PLoS Genet.* **12**, e1006157 (2016).
75. Slatkin, M. Rare alleles as indicators of gene flow. *Evolution* **39**, 53–65 (1985).
76. Hey, J. & Nielsen, R. Integration within the Felsenstein equation for improved Markov chain Monte Carlo methods in population genetics. *PNAS* **104**, 2785–2790 (2007).
77. Strasburg, J. L. & Rieseberg, L. H. How robust are ‘Isolation with Migration’ analyses to violations of the IM model? A simulation study. *Mol. Biol. Evol.* **27**, 297–310 (2010).
78. Foster, S. A., McKinnon, G. E., Steane, D. A., Potts, B. M. & Vaillancourt, R. E. Parallel evolution of dwarf ecotypes in the forest tree *Eucalyptus globulus*. *New Phytol.* **175**, 370–380 (2007).
79. Cai, Z. *et al.* Parallel speciation of wild rice associated with habitat shifts. *Mol. Biol. Evol.* **36**, 875–889 (2019).
80. Konečná, V., Nowak, M. D. & Kolář, F. Parallel colonization of subalpine habitats in the central European mountains by *Primula elatior*. *Sci. Rep.* **9**, 3294 (2019).
81. Clarke, J. D. Cetyltrimethyl Ammonium Bromide (CTAB) DNA miniprep for plant DNA isolation. *Cold Spring Harb. Protoc.* **2009**, Pdb.prot5177 (2009).
82. Poland, J. A., Brown, P. J., Sorrells, M. E. & Jannink, J. L. Development of high-density genetic maps for barley and wheat using a novel two-enzyme Genotyping-by-Sequencing approach. *PLoS ONE* **7**, e32253 (2012).
83. Faircloth, B. & Glenn, T. *Serapure*. ([https://ethanomics.files.wordpress.com/2012/08/serapure\\_v2-2.pdf](https://ethanomics.files.wordpress.com/2012/08/serapure_v2-2.pdf), 2011).
84. Rohland, N. & Reich, D. Cost-effective, high-throughput DNA sequencing libraries for multiplexed target capture. *Genome Res.* **22**, 939–946 (2012).
85. Schmieder, R., Lim, Y. W., Rohwer, F. & Edwards, R. TagCleaner: Identification and removal of tag sequences from genomic and metagenomic datasets. *BMC Bioinformatics* **11**, 341 (2010).
86. Li, H. Aligning sequence reads, clone sequences and assembly contigs with BWA-MEM. arXiv:1303.3997 [q-bio.GN] (2013).

87. Li, H. & Durbin, R. Fast and accurate short read alignment with Burrows-Wheeler transform. *Bioinformatics* **25**, 1754–1760 (2009).
88. Broad Institute. *PicardTools*. (GitHub Repository. <http://broadinstitute.github.io/picard/>, 2019).
89. Garrison, E. & Marth, G. Haplotype-based variant detection from short-read sequencing. arXiv. arXiv:1207.3907v2 [q-bio.GN] (2012).
90. Li, H. *et al.* The Sequence Alignment/Map format and SAMtools. *Bioinformatics* **25**, 2078–2079 (2009).
91. Tan, A., Abecasis, G. R. & Kang, H. M. Unified representation of genetic variants. *Bioinformatics* **31**, 2202–2204 (2015).
92. Puritz, J. B., Hollenbeck, C. M. & Gold, J. R. *dDocent*: a RADseq, variant-calling pipeline designed for population genomics of non-model organisms. *PeerJ* **2**, e431 (2014).
93. Puritz, J. B. *et al.* Demystifying the RAD fad. *Mol. Ecol.* **23**, 5937–5942 (2014).
94. O’Leary, S. J., Puritz, J. B., Willis, S. C., Hollenbeck, C. M. & Portnoy, D. S. These aren’t the loci you’re looking for: Principles of effective SNP filtering for molecular ecologists. *Mol. Ecol.* **27**, 3193–3206 (2018).
95. Danecek, P. *et al.* The variant call format and VCFtools. *Bioinformatics* **27**, 2156–2158 (2011).
96. Garrison, E. *Vcflib, a simple C++ library for parsing and manipulating VCF files*. (<https://github.com/vcflib/vcflib>, 2016).
97. Raj, A., Stephens, M. & Pritchard, J. K. fastSTRUCTURE: Variational inference of population structure in large SNP data sets. *Genetics* **197**, 573–589 (2014).
98. Purcell, S. *et al.* PLINK: A tool set for whole-genome association and population-based linkage analyses. *Am. J. Hum. Genet.* **81**, 559–575 (2007).
99. Nguyen, L. T., Schmidt, H. A., von Haeseler, A. & Minh, B. Q. IQ-TREE: A fast and effective stochastic algorithm for estimating maximum-likelihood phylogenies. *Mol. Biol. Evol.* **32**, 268–274 (2015).
100. Schrempf, D., Minh, B. Q., De Maio, N., von Haeseler, A. & Kosiol, C. Reversible polymorphism-aware phylogenetic models and their application to tree inference. *J. Theor. Biol.* **407**, 362–370 (2016).
101. Kalyaanamoorthy, S., Minh, B. Q., Wong, T. K. F., von Haeseler, A. & Jermini, L. S. ModelFinder: fast model selection for accurate phylogenetic estimates. *Nat. Methods* **14**, 587–589 (2017).

102. Hoang, D. T., Chernomor, O., von Haeseler, A., Minh, B. Q. & Vinh, L. S. UFBoot2: Improving the ultrafast bootstrap approximation. *Mol. Biol. Evol.* **35**, 518–522 (2018).
103. Guindon, S. *et al.* New algorithms and methods to estimate maximum-likelihood phylogenies: Assessing the performance of PhyML 3.0. *Syst. Biol.* **59**, 307–321 (2010).
104. Gilbert, K. J. *et al.* Recommendations for utilizing and reporting population genetic analyses: the reproducibility of genetic clustering using the program STRUCTURE. *Mol Ecol* **21**, 4925–4930 (2012).
105. Janes, J. K. *et al.* The  $K = 2$  conundrum. *Mol Ecol* **26**, 3594–3602 (2017).
106. Francis, R. M. POPHELPER: an R package and web app to analyse and visualize population structure. *Mol. Ecol. Resour.* **17**, 27–32 (2017).
107. Reich, D., Thangaraj, K., Patterson, N., Price, A. L. & Singh, L. Reconstructing Indian population history. *Nature* **461**, 489–494 (2009).
108. R Core Team. *R: A language and environment for statistical computing.* (R Foundation for Statistical Computing, Vienna, Austria. <https://www.R-project.org/>, 2017).
109. Blanchet, G. *et al.* *vegan: Community Ecology Package.* (R package version 2.5-2. <https://CRAN.R-project.org/package=vegan>, 2018).
110. Falush, D., Stephens, M. & Pritchard, J. K. Inference of population structure using multilocus genotype data: linked loci and correlated allele frequencies. *Genetics* **164**, 1567–1587 (2003).
111. Excoffier, L., Dupanloup, I., Huerta-Sánchez, E., Sousa, V. C. & Foll, M. Robust demographic inference from genomic and SNP data. *PLoS Genet.* **9**, e1003905 (2013).
112. Hahn, M. W. *Molecular population genetics.* (Sinauer Associates, Sunderland, 2018).
113. Liu, S., Ferchaud, A. L., GrønkJaer, P., Nygaard, R. & Hansen, M. M. Genomic parallelism and lack thereof in contrasting systems of three-spined sticklebacks. *Mol. Ecol.* **27**, 4725–4743 (2018).
114. Strasburg, J. L. & Rieseberg, L. H. Molecular demographic history of the annual sunflowers *Helianthus annuus* and *H. petiolaris*-large effective population sizes and rates of long-term gene flow. *Evolution* **62**, 1936–1950 (2008).
115. Thomé, M. T. C. & Carstens, B. C. Phylogeographic model selection leads to insight into the evolutionary history of four-eyed frogs. *PNAS* **113**, 8010–8017 (2016).
116. Bagley, R. K., Sousa, V. C., Niemiller, M. L. & Linnen, C. R. History, geography and host use shape genomewide patterns of genetic variation in the redheaded pine sawfly (*Neodiprion lecontei*). *Mol. Ecol.* **26**, 1022–1044 (2017).



117. Mangiafico, S., S. *An R companion for the handbook of biological statistics*. (<https://rcompanion.org/rcompanion/>, 2015).
118. Guerrero, R. F. & Hahn, M. W. Quantifying the risk of hemiplasy in phylogenetic inference. *Proc Natl Acad Sci USA* **115**, 12787–12792 (2018).
119. Hibbins, M. S., Gibson, M. J. S. & Hahn, M. W. Determining the probability of hemiplasy in the presence of incomplete lineage sorting and introgression. Preprint at <https://doi.org/10.1101/2020.04.15.043752>. (2020).

## Figures

**Fig. 1 The colonization history and phylogenetic topology for alternate origin scenarios**

Schematic diagram representing the colonization history and phylogenetic topology of two ecotypes (dark green and light green) from an ancestral population (grey) for three origin scenarios. Solid arrows depict the sequence of colonization. Double headed dotted arrows represent gene flow ( $m$ ) between the ecotypes within each locality. L1, L2 and L3 represent three geographically distant localities, where a population of each ecotype resides. **(A)** Within a single origin scenario, the two ecotypes arise once from the ancestor, followed by range expansion. In the absence of gene flow, ecotypes form monophyletic clades within the phylogeny. **(B)** The single origin with gene flow scenario involves gene flow upon secondary contact between the ecotypes within each locality. Here, the observed phylogenetic topology shows populations clustering according to their geographic distribution. **(C)** Within a multiple origin scenario, the ancestral (dark green) ecotype arises once from the ancestor followed by range expansion, with the derived (light green) populations independently arising from each dark green population. Populations phylogenetically cluster according to their geographic distribution, which can be indistinguishable from a single origin with gene flow scenario **(B)**.

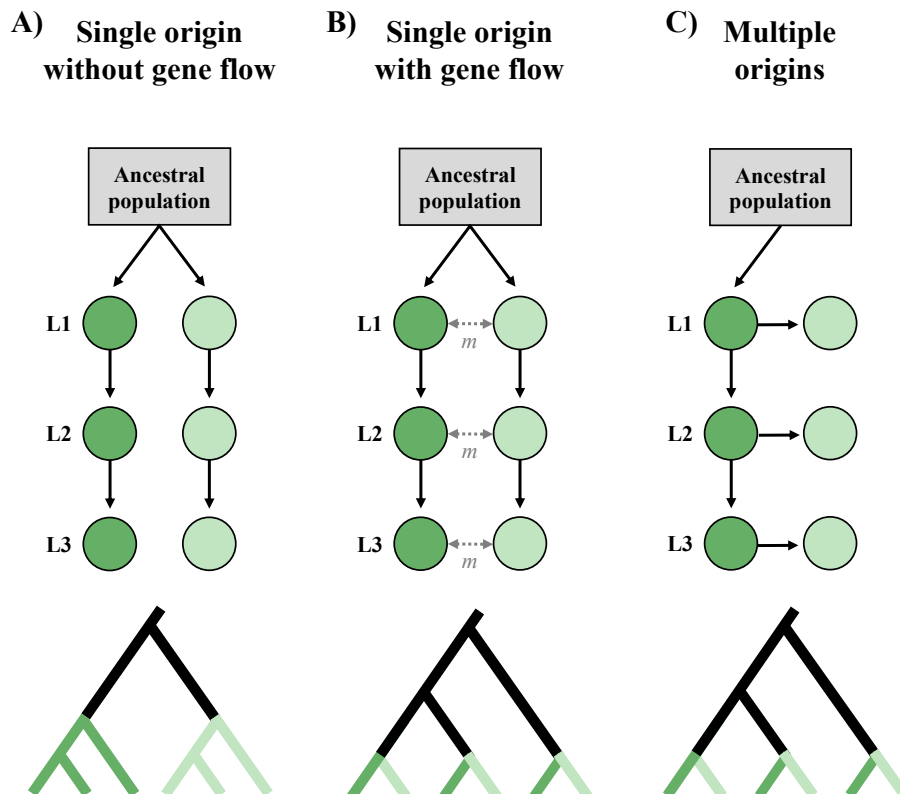

**Fig. 2 Sampling locations and genetic clustering of *Senecio lautus* populations**

(A) Sampling locations of the 23 Dune (orange) and Headland (green) *Senecio lautus* populations along the coast of Australia. (B) Maximum likelihood phylogeny of Dune and Headland populations implemented in *IQ-TREE*. Numbers on each node represent the SH-alRT support (%), followed by the ultrafast bootstrap support (%). (C) Bayesian assignment of individuals to genetic clusters within *fastSTRUCTURE* for K=2-4. Each of the 1,319 individuals is depicted as a bar, with colors representing ancestry proportions to each cluster. Populations are ordered according to their geographic distribution along the coast.

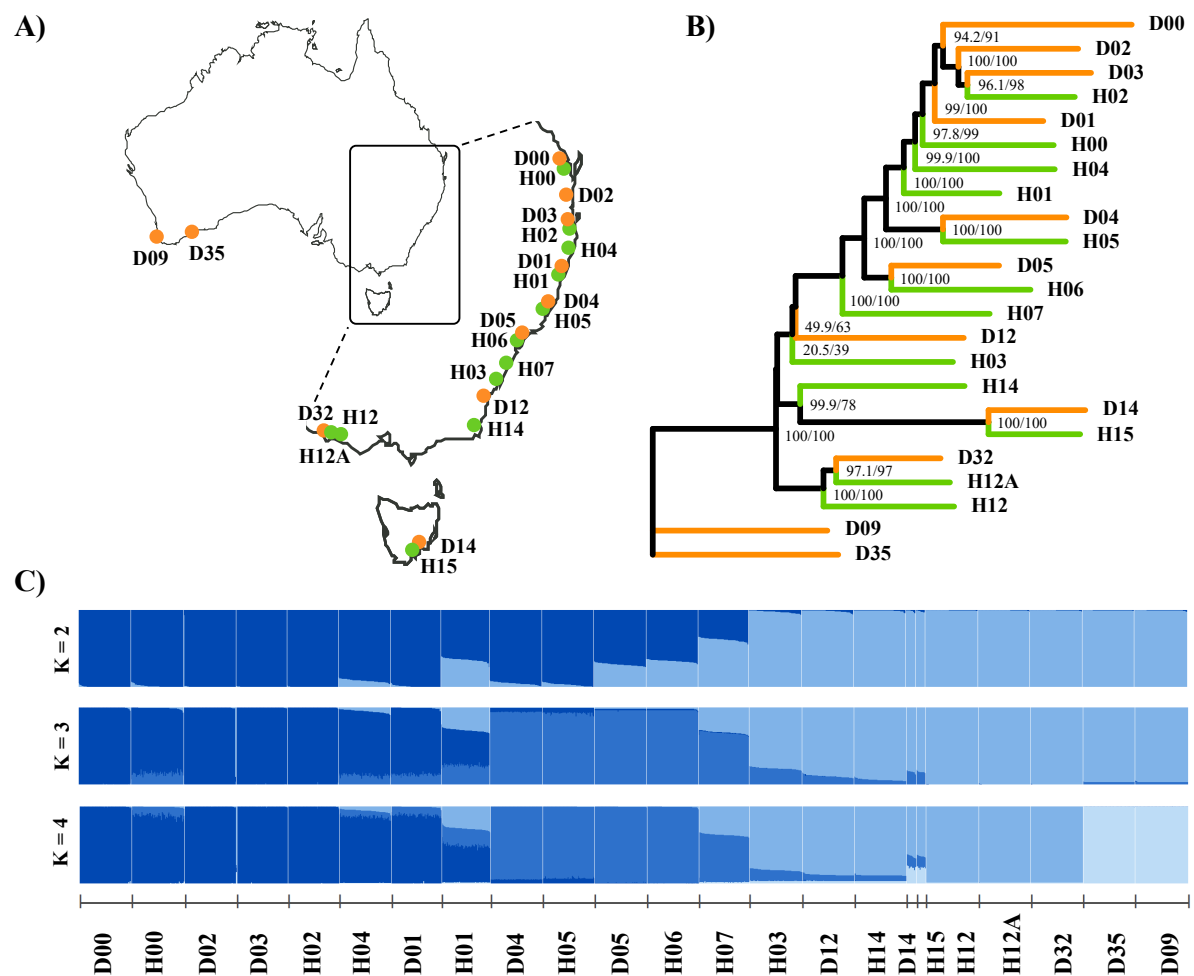

**Fig. 3 Patterns of long-distance gene flow, IBD, and genetic clustering**

**(A)** Maximum likelihood tree with one migration event inferred in *TreeMix*, the x-axis representing genetic drift. The red arrow represents the migration event ( $w = 0.40$ ). **(B)** Patterns of isolation by distance across Dune and Headland populations for Dune-Headland (DH, black), Dune-Dune (DD, orange) and Headland-Headland (HH, green) pairs. Average migration rate is the mean bidirectional migration for each pair estimated in *fastsimcoal2*. Grey shading represents the null expectation for migration rates, inferred from the maximum migration value from three allopatric comparisons. Grey horizontal dashed line represents one migrant per generation ( $2Nm = 1$ ). Pairs falling above this line are labelled. Black dashed line represents the linear model for the DH comparisons. **(C)** Patterns of isolation by distance using Slatkin's  $\hat{M}$  for parapatric Dune-Headland (black), Dune-Dune (orange) and Headland-Headland (green) pairs. Black, orange and green dashed line represent the linear model for the DH, DD and HH comparisons respectively. **(D)** Bayesian assignment of individuals to genetic clusters within *fastSTRUCTURE* for  $K=23$ . Each of the 1,319 individuals is depicted as a bar, with colors representing ancestry proportions to each cluster. Populations are ordered according to their geographic distribution along the coast.

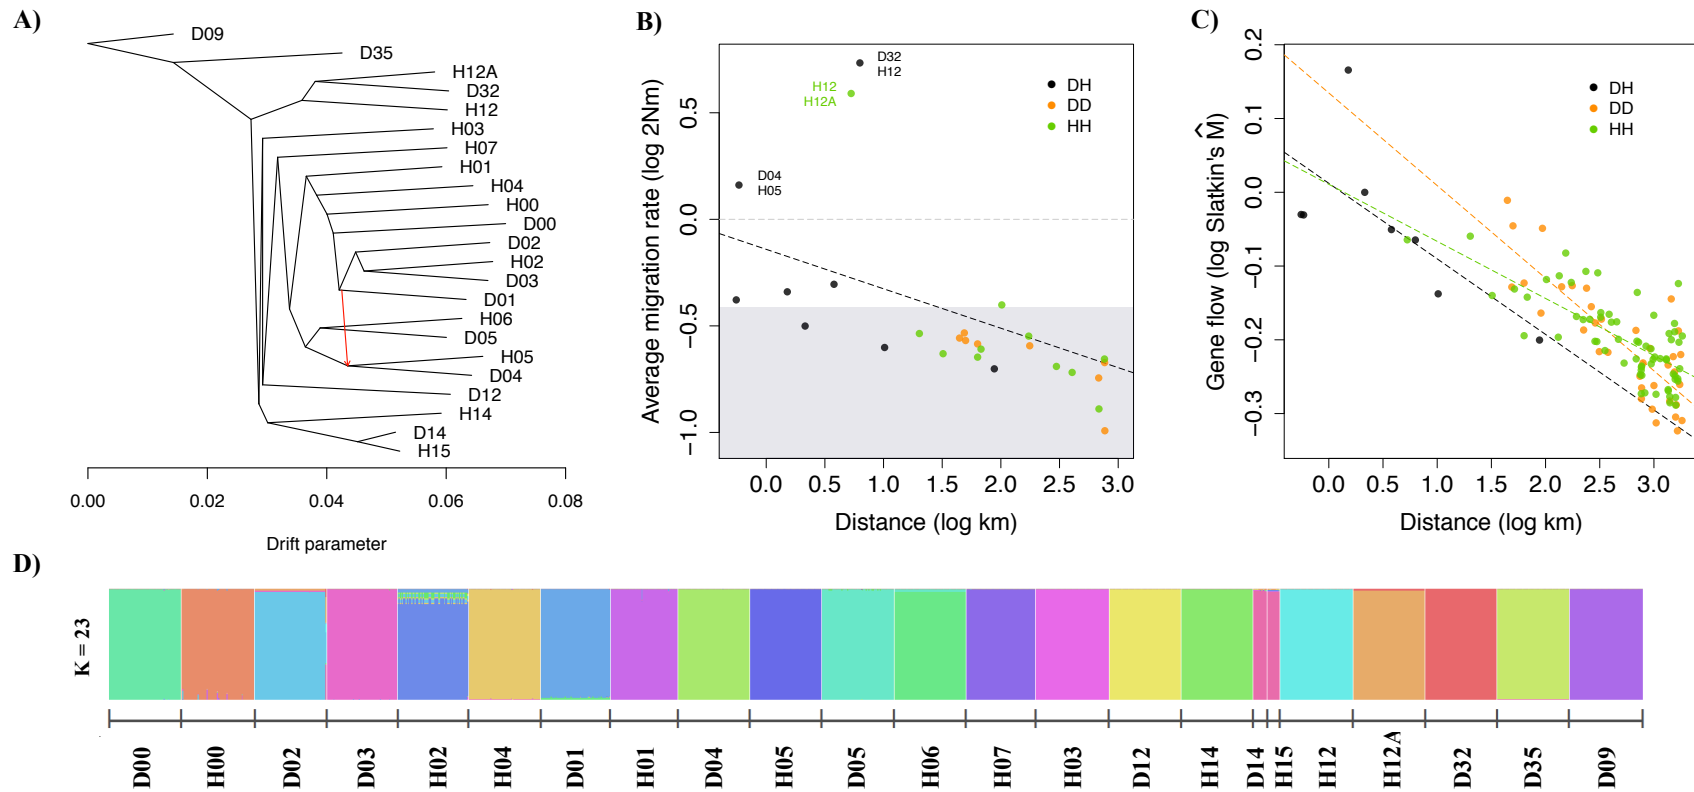

**Fig. 4 Patterns of gene flow and admixture between parapatric Dune-Headland populations**

**(A)** Schematic diagram representing the eight demographic models run in *fastsimcoal2* and their estimated parameters: no migration, bidirectional migration, Dune to Headland migration, Headland to Dune migration, bidirectional migration after secondary contact, Dune to Headland migration after secondary contact, Headland to Dune migration after secondary contact, bidirectional migration after population splitting with cessation of gene flow. **(B)** Bayesian assignment of individuals to genetic clusters within *STRUCTURE* for  $K=2$  for the Dune (dark green) and Headland (light green) ecotypes at each locality. Each individual is depicted as a bar, with colors representing ancestry proportions to each cluster. Below are the migration rates ( $m$ , forward in time) from the Dune to Headland, and Headland to Dune within each locality estimated within *fastsimcoal2*. Asterisks denote pairs with  $2Nm > 1$ .

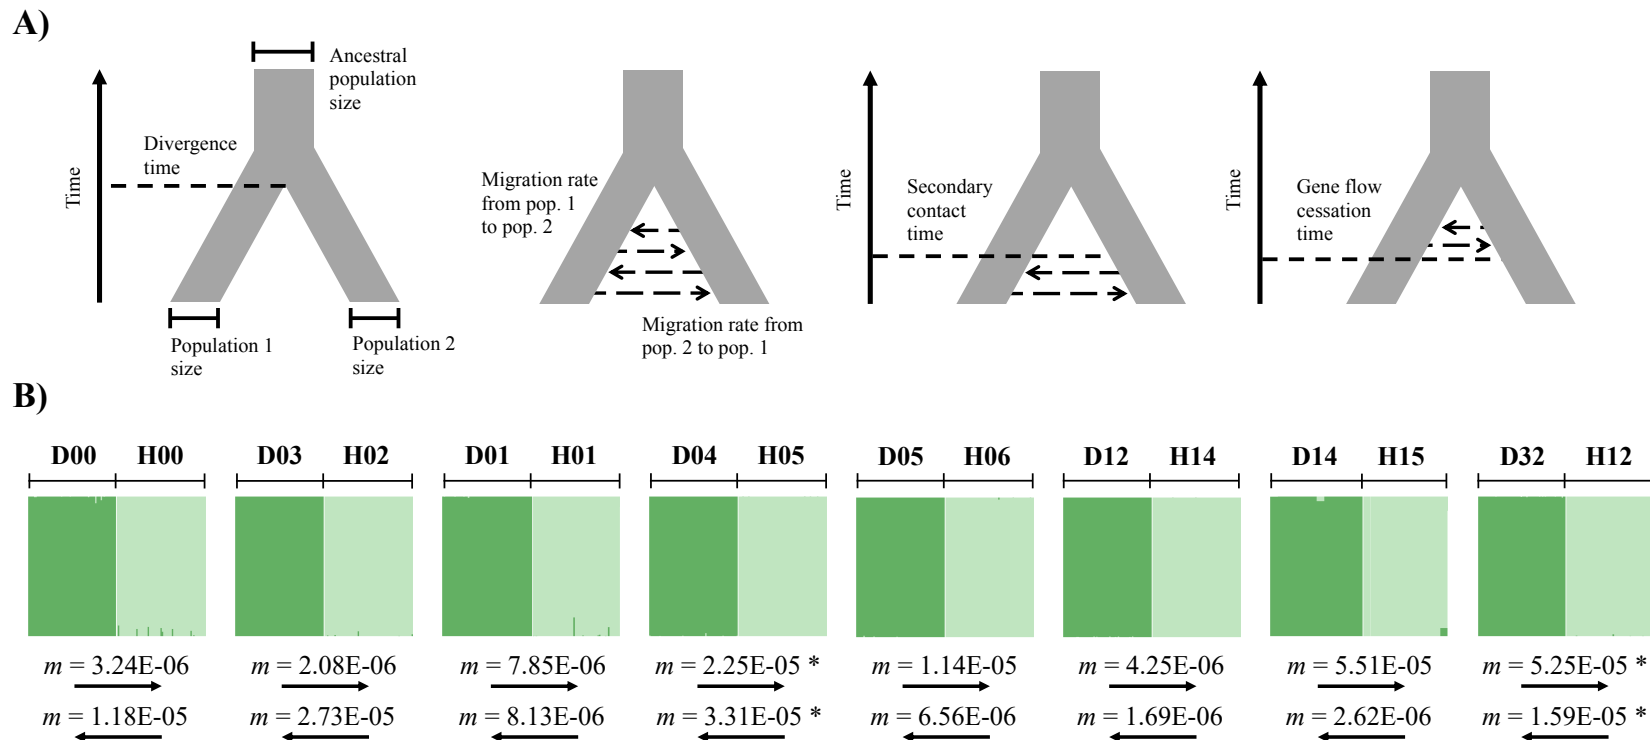

**Fig. 5 Coalescent modelling to infer the probability of phylogenetic distortion**

**(A)** Schematic diagram representing the modelled single origin scenario.  $t_2$  represents the time to the split of the ancestral population (i.e., the initial origin of the Dune and Headland ecotypes). Each of these two ecotypes further split at time  $t_1$  in the past. Parapatric populations at each locality are connected with dashed lines, and an instantaneous burst of migration ( $m$ ) occurs at time  $t_m$  in the past (dashed horizontal red line). In the model, all times are expressed in units of  $2N$  generations. Light green and dark green circles represent populations from different ecotypes.

**(B, C)** Probability that the phylogenetic topology of the single origin scenario is distorted, falsely suggesting the parallel evolution of ecotypes. Population size is set to 250,000 and  $t_m$  is 0.1 (corresponding to 50,000 generations). Small phylogenies are schematic diagrams of the extreme values of the y-axis **(B)** High probability of phylogenetic distortion occurs when internal branches (IB) are short (lower yellow region).  $t_1$  is set to 1 (corresponding to 500,000 generations). **(C)** The probability of phylogenetic distortion requires high migration and increases when length of terminal branches (TB) are longer prior to the burst of migration (right-hand yellow region).  $t_2$  is set to 1 (corresponding to 500,000 generations). Note the different scale of probability in panel **(C)** compared to panel **(B)**.

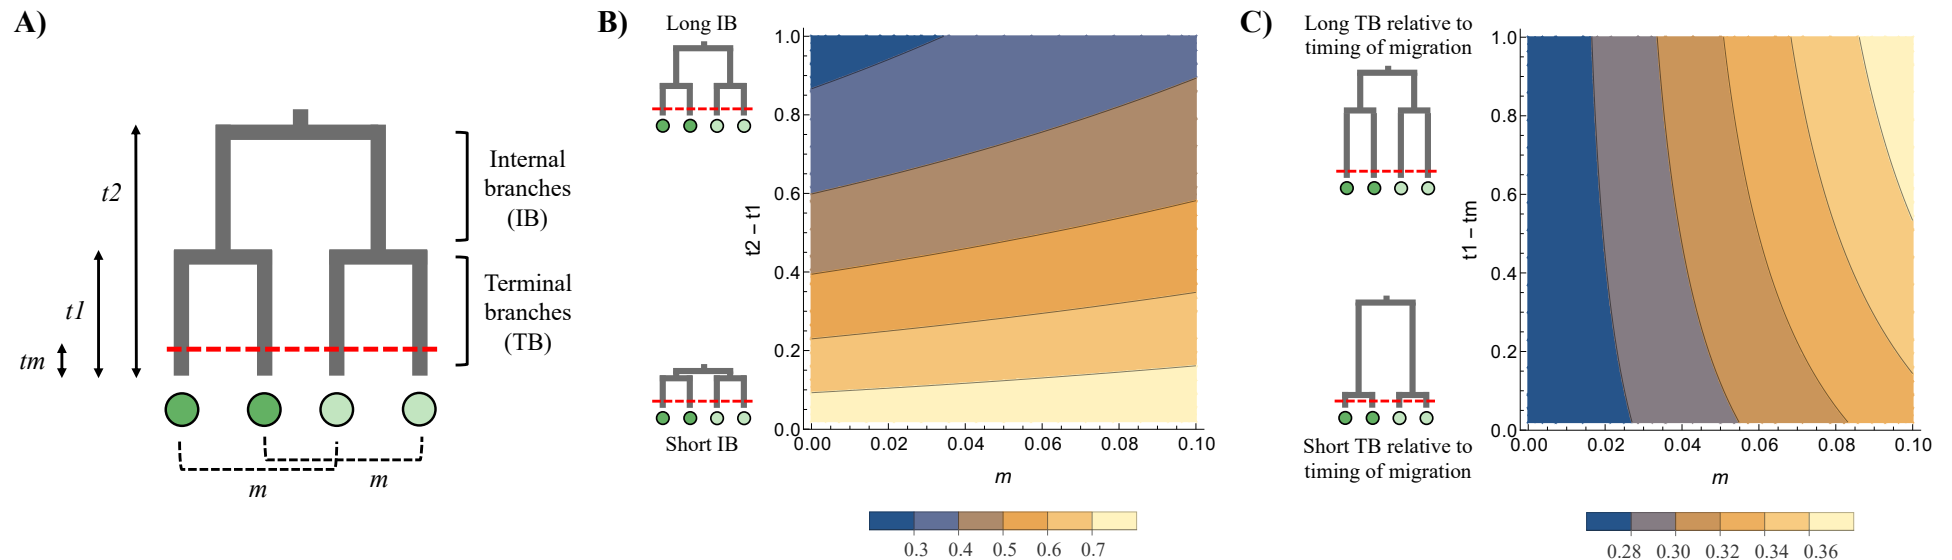

## Supplementary information

### Supplementary Table S1. Pairwise $F_{ST}$ values for *S. lautus* populations

Pairwise  $F_{ST}$  values between all 21 populations of the eastern and south-eastern clades.

|             | D00  | D01  | D02  | D03  | D04  | D05  | D12  | D14  | D32  | H00  | H01  | H02  | H03  | H04  | H05  | H06  | H07  | H12  | H12A | H14  | H15 |  |
|-------------|------|------|------|------|------|------|------|------|------|------|------|------|------|------|------|------|------|------|------|------|-----|--|
| <b>D00</b>  | -    |      |      |      |      |      |      |      |      |      |      |      |      |      |      |      |      |      |      |      |     |  |
| <b>D01</b>  | 0.25 | -    |      |      |      |      |      |      |      |      |      |      |      |      |      |      |      |      |      |      |     |  |
| <b>D02</b>  | 0.25 | 0.22 | -    |      |      |      |      |      |      |      |      |      |      |      |      |      |      |      |      |      |     |  |
| <b>D03</b>  | 0.27 | 0.22 | 0.20 | -    |      |      |      |      |      |      |      |      |      |      |      |      |      |      |      |      |     |  |
| <b>D04</b>  | 0.29 | 0.25 | 0.26 | 0.28 | -    |      |      |      |      |      |      |      |      |      |      |      |      |      |      |      |     |  |
| <b>D05</b>  | 0.29 | 0.25 | 0.27 | 0.27 | 0.25 | -    |      |      |      |      |      |      |      |      |      |      |      |      |      |      |     |  |
| <b>D12</b>  | 0.34 | 0.29 | 0.31 | 0.33 | 0.31 | 0.28 | -    |      |      |      |      |      |      |      |      |      |      |      |      |      |     |  |
| <b>D14</b>  | 0.34 | 0.28 | 0.29 | 0.31 | 0.29 | 0.26 | 0.32 | -    |      |      |      |      |      |      |      |      |      |      |      |      |     |  |
| <b>D32</b>  | 0.34 | 0.30 | 0.33 | 0.34 | 0.32 | 0.30 | 0.30 | 0.32 | -    |      |      |      |      |      |      |      |      |      |      |      |     |  |
| <b>H00</b>  | 0.26 | 0.23 | 0.24 | 0.25 | 0.26 | 0.26 | 0.29 | 0.28 | 0.31 | -    |      |      |      |      |      |      |      |      |      |      |     |  |
| <b>H01</b>  | 0.26 | 0.22 | 0.25 | 0.25 | 0.25 | 0.24 | 0.26 | 0.25 | 0.28 | 0.23 | -    |      |      |      |      |      |      |      |      |      |     |  |
| <b>H02</b>  | 0.26 | 0.21 | 0.21 | 0.20 | 0.27 | 0.27 | 0.31 | 0.30 | 0.33 | 0.25 | 0.25 | -    |      |      |      |      |      |      |      |      |     |  |
| <b>H03</b>  | 0.33 | 0.29 | 0.31 | 0.32 | 0.30 | 0.27 | 0.28 | 0.30 | 0.30 | 0.29 | 0.25 | 0.31 | -    |      |      |      |      |      |      |      |     |  |
| <b>H04</b>  | 0.28 | 0.23 | 0.25 | 0.26 | 0.27 | 0.26 | 0.30 | 0.29 | 0.31 | 0.24 | 0.22 | 0.26 | 0.29 | -    |      |      |      |      |      |      |     |  |
| <b>H05</b>  | 0.29 | 0.25 | 0.27 | 0.28 | 0.21 | 0.26 | 0.31 | 0.30 | 0.32 | 0.27 | 0.25 | 0.27 | 0.30 | 0.27 | -    |      |      |      |      |      |     |  |
| <b>H06</b>  | 0.30 | 0.27 | 0.28 | 0.29 | 0.27 | 0.21 | 0.30 | 0.28 | 0.31 | 0.27 | 0.24 | 0.28 | 0.28 | 0.27 | 0.28 | -    |      |      |      |      |     |  |
| <b>H07</b>  | 0.31 | 0.27 | 0.28 | 0.29 | 0.28 | 0.24 | 0.28 | 0.28 | 0.30 | 0.27 | 0.24 | 0.29 | 0.27 | 0.27 | 0.28 | 0.26 | -    |      |      |      |     |  |
| <b>H12</b>  | 0.35 | 0.31 | 0.33 | 0.34 | 0.33 | 0.30 | 0.31 | 0.32 | 0.22 | 0.31 | 0.28 | 0.33 | 0.30 | 0.31 | 0.33 | 0.32 | 0.30 | -    |      |      |     |  |
| <b>H12A</b> | 0.34 | 0.30 | 0.33 | 0.33 | 0.32 | 0.30 | 0.29 | 0.31 | 0.20 | 0.31 | 0.27 | 0.32 | 0.29 | 0.31 | 0.32 | 0.32 | 0.30 | 0.22 | -    |      |     |  |
| <b>H14</b>  | 0.34 | 0.30 | 0.31 | 0.33 | 0.31 | 0.28 | 0.28 | 0.30 | 0.30 | 0.30 | 0.27 | 0.32 | 0.28 | 0.29 | 0.32 | 0.30 | 0.28 | 0.31 | 0.30 | -    |     |  |
| <b>H15</b>  | 0.34 | 0.28 | 0.29 | 0.31 | 0.30 | 0.26 | 0.32 | 0.15 | 0.32 | 0.28 | 0.25 | 0.30 | 0.30 | 0.29 | 0.31 | 0.28 | 0.28 | 0.32 | 0.30 | 0.30 | -   |  |

**Supplementary Table S2. Estimation of gene flow and other demographic parameters in *fastsimcoal2***

Populations: the two populations used for each comparison (population 1 is on the left, and population 2 on the right). Asize: ancestral effective population size. Pop1size: effective population size of population 1. Pop2size: effective population size of population 2.

DivTime: divergence time. SecTime: time since gene flow upon secondary contact.  $2Nm_{P1 \rightarrow P2}$ : migration rate ( $2Nm$ ) from population 1 to population 2.  $2Nm_{P2 \rightarrow P1}$ : migration rate ( $2Nm$ ) from population 2 to population 1. Migration rates are forward in time. Values in bold represent  $2Nm > 1$ .

| Comparison        | Populations | Asize  | Pop1size | Pop2size | DivTime | SecTime | $2Nm_{P1 \rightarrow P2}$ | $2Nm_{P2 \rightarrow P1}$ |
|-------------------|-------------|--------|----------|----------|---------|---------|---------------------------|---------------------------|
| Dune-Headland     | D00-H00     | 100497 | 47926    | 134364   | 71945   | 18690   | 0.2176                    | 0.2830                    |
|                   | D03-H02     | 88035  | 34637    | 152616   | 44190   | 15031   | 0.1590                    | 0.4722                    |
|                   | D01-H01     | 72385  | 90270    | 159101   | 71918   | 13268   | 0.6241                    | 0.3671                    |
|                   | D04-H05     | 87603  | 90859    | 123949   | 30707   | 6329    | <b>1.3942</b>             | <b>1.5024</b>             |
|                   | D05-H06     | 97653  | 131873   | 70970    | 67927   | 16810   | 0.4049                    | 0.4325                    |
|                   | D12-H14     | 56510  | 211701   | 103102   | 110018  | 11783   | 0.2188                    | 0.1787                    |
|                   | D14-H15     | 102574 | 39573    | 143420   | 47929   | 39730   | 0.3952                    | 0.5187                    |
|                   | D32-H12     | 56568  | 661726   | 212041   | 38706   | 11290   | <b>5.5694</b>             | <b>5.2694</b>             |
| Dune-Dune         | D00-D02     | 97055  | 63843    | 113624   | 52711   | 6436    | 0.3242                    | 0.2617                    |
|                   | D01-D03     | 99168  | 142624   | 51613    | 58652   | 23772   | 0.3280                    | 0.2119                    |
|                   | D01-D04     | 92638  | 121936   | 74257    | 66970   | 11319   | 0.2901                    | 0.2200                    |
|                   | D02-D03     | 93440  | 116800   | 48492    | 54857   | 23163   | 0.3514                    | 0.2029                    |
|                   | D04-D05     | 78638  | 86635    | 110138   | 77895   | 18111   | 0.3178                    | 0.2027                    |
|                   | D05-D12     | 35322  | 103044   | 223346   | 128159  | 21689   | 0.1562                    | 0.2041                    |
|                   | D12-D14     | 22223  | 259172   | 38450    | 118024  | 35758   | 0.0991                    | 0.1046                    |
|                   | D14-D32     | 47348  | 27002    | 641721   | 56330   | 12595   | 0.3179                    | 0.1074                    |
| Headland-Headland | H00-H02     | 97070  | 107516   | 94259    | 81290   | 9622    | 0.3920                    | 0.4012                    |
|                   | H01-H04     | 78784  | 171269   | 86431    | 81443   | 19633   | 0.2561                    | 0.3261                    |
|                   | H01-H05     | 61893  | 173061   | 89468    | 95145   | 17016   | 0.2546                    | 0.3116                    |
|                   | H02-H04     | 78009  | 107213   | 91698    | 87055   | 20222   | 0.2913                    | 0.1768                    |
|                   | H03-H07     | 57850  | 147099   | 125603   | 109197  | 12874   | 0.1904                    | 0.1921                    |
|                   | H03-H14     | 63207  | 157400   | 119559   | 108683  | 9099    | 0.2068                    | 0.2012                    |
|                   | H05-H06     | 84257  | 109077   | 88382    | 81710   | 10907   | 0.2559                    | 0.1953                    |
|                   | H06-H07     | 67117  | 89121    | 141737   | 88627   | 14422   | 0.2532                    | 0.2387                    |
|                   | H12-H12A    | 52196  | 286574   | 322443   | 43928   | 14082   | <b>3.7584</b>             | <b>4.0315</b>             |
|                   | H12-H15     | 46457  | 362929   | 51902    | 81116   | 9800    | 0.1921                    | 0.2501                    |
|                   | H14-H15     | 46091  | 168257   | 72243    | 101092  | 18596   | 0.1396                    | 0.1181                    |
| Allopatric        | D03-D32     | 35657  | 53174    | 566115   | 76621   | 5201    | 0.3873                    | 0.3238                    |
|                   | D03-H12     | 37227  | 67316    | 333665   | 99511   | 8840    | 0.1984                    | 0.2642                    |
|                   | H02-H12     | 33876  | 78181    | 313687   | 111278  | 9257    | 0.1884                    | 0.2707                    |



**Supplementary Table S3. Confidence intervals for gene flow estimates inferred in *fastsimcoal2***

95% confidence intervals (CI) for migration rates inferred from 100 bootstrap runs in *fastsimcoal2*. Populations: the two populations used for each comparison; population 1 (*P1*) is on the left, and population 2 (*P2*) on the right.  $2Nm_{P1 \rightarrow P2min}$  and  $max$  are the lower and upper 95% CI for migration rate ( $2Nm$ ) from *P1* to *P2*, respectively.  $2Nm_{P2 \rightarrow P1min}$  and  $max$  are the lower and upper 95% CI for migration rate from *P2* to *P1*, respectively.

Migration rates are forward in time. Populations in bold represent  $2Nm > 1$ .

| Comparison        | Populations     | $2Nm_{P1 \rightarrow P2min}$ | $2Nm_{P1 \rightarrow P2max}$ | $2Nm_{P2 \rightarrow P1min}$ | $2Nm_{P2 \rightarrow P1max}$ |
|-------------------|-----------------|------------------------------|------------------------------|------------------------------|------------------------------|
| Dune-Headland     | D00-H00         | 0.2181                       | 0.2281                       | 0.2769                       | 0.2865                       |
|                   | D03-H02         | 0.1511                       | 0.1611                       | 0.4576                       | 0.4758                       |
|                   | D01-H01         | 0.5991                       | 0.6174                       | 0.3554                       | 0.3655                       |
|                   | <b>D04-H05</b>  | <b>1.3120</b>                | <b>1.3648</b>                | <b>1.4347</b>                | <b>1.4903</b>                |
|                   | D05-H06         | 0.3924                       | 0.4054                       | 0.4172                       | 0.4321                       |
|                   | D12-H14         | 0.2174                       | 0.2236                       | 0.1775                       | 0.1840                       |
|                   | D14-H15         | 0.3776                       | 0.4010                       | 0.5001                       | 0.5215                       |
|                   | <b>D32-H12</b>  | <b>4.9046</b>                | <b>5.0810</b>                | <b>5.2088</b>                | <b>5.3999</b>                |
| Dune-Dune         | D00-D02         | 0.3186                       | 0.3344                       | 0.2576                       | 0.2686                       |
|                   | D01-D03         | 0.3183                       | 0.3305                       | 0.2040                       | 0.2137                       |
|                   | D01-D04         | 0.2818                       | 0.2911                       | 0.2148                       | 0.2226                       |
|                   | D02-D03         | 0.3417                       | 0.3563                       | 0.2000                       | 0.2096                       |
|                   | D04-D05         | 0.3106                       | 0.3228                       | 0.2008                       | 0.2078                       |
|                   | D05-D12         | 0.1533                       | 0.1584                       | 0.2020                       | 0.2077                       |
|                   | D12-D14         | 0.0976                       | 0.1011                       | 0.1037                       | 0.1068                       |
|                   | D14-D32         | 0.3109                       | 0.3274                       | 0.1050                       | 0.1106                       |
| Headland-Headland | H00-H02         | 0.3828                       | 0.3952                       | 0.3901                       | 0.4038                       |
|                   | H01-H04         | 0.2504                       | 0.2574                       | 0.3183                       | 0.3290                       |
|                   | H01-H05         | 0.2485                       | 0.2558                       | 0.3033                       | 0.3139                       |
|                   | H02-H04         | 0.2892                       | 0.2978                       | 0.1741                       | 0.1802                       |
|                   | H03-H07         | 0.1882                       | 0.1945                       | 0.1917                       | 0.1975                       |
|                   | H03-H14         | 0.2029                       | 0.2089                       | 0.1976                       | 0.2038                       |
|                   | H05-H06         | 0.2526                       | 0.2610                       | 0.1926                       | 0.1992                       |
|                   | H06-H07         | 0.2460                       | 0.2537                       | 0.2310                       | 0.2382                       |
|                   | <b>H12-H12A</b> | <b>3.6292</b>                | <b>3.7754</b>                | <b>3.9901</b>                | <b>4.1278</b>                |
|                   | H12-H15         | 0.1878                       | 0.1954                       | 0.2484                       | 0.2574                       |
|                   | H14-H15         | 0.1357                       | 0.1415                       | 0.1163                       | 0.1202                       |
| Allopatric        | D03-D32         | 0.3699                       | 0.3893                       | 0.3174                       | 0.3273                       |
|                   | D03-H12         | 0.1932                       | 0.2013                       | 0.2604                       | 0.2680                       |
|                   | H02-H12         | 0.1832                       | 0.1900                       | 0.2645                       | 0.2731                       |

**Supplementary Table S4. Parameter estimates for all tested models in *fastsimcoal2***

(see excel file for Supplementary Table S4)

### Supplementary Table S5. Sampling locations

Sampling locations of the 23 *Senecio laetus* Dune and Headland populations. Coordinates represent the mid-point of each population. N corresponds to the final number of individuals after removing individuals with low coverage. Parapatric pairs in bold are sister-taxa within the phylogeny. H12A is a population found within an ecotone between the Dune (D32) and Headland (H12) at this locality.

| Clade         | Population code | Location                              | Ecotype      | Pair           | Coordinates                | N  |
|---------------|-----------------|---------------------------------------|--------------|----------------|----------------------------|----|
| Eastern       | D00             | QLD: Stradbroke Island                | Dune         | D00-H00        | S27° 31.153' E153° 30.189' | 62 |
| Eastern       | H00             | QLD: Stradbroke Island                | Headland     | D00-H00        | S27° 26.140' E153° 32.749' | 63 |
| Eastern       | D02             | QLD: Southport                        | Dune         | -              | S27° 56.846' E153° 25.736' | 62 |
| Eastern       | D03             | NSW: Cabarita                         | Dune         | <b>D03-H02</b> | S28° 19.794' E153° 34.264' | 61 |
| Eastern       | H02             | NSW: Cabarita                         | Headland     | <b>D03-H02</b> | S28° 21.013' E153° 34.676' | 61 |
| Eastern       | H04             | NSW: Byron Bay                        | Headland     | -              | S28° 38.060' E153° 38.268' | 62 |
| Eastern       | D01             | NSW: Lennox Head                      | Dune         | D01-H01        | S28° 46.858' E153° 35.655' | 60 |
| Eastern       | H01             | NSW: Lennox Head                      | Headland     | D01-H01        | S28° 48.813' E153° 36.313' | 58 |
| Eastern       | D04             | NSW: Coffs Harbour                    | Dune         | <b>D04-H05</b> | S30° 18.946' E153° 08.142' | 62 |
| Eastern       | H05             | NSW: Coffs Harbour                    | Headland     | <b>D04-H05</b> | S30° 18.741' E153° 08.676' | 62 |
| Eastern       | D05             | NSW: South West Rocks                 | Dune         | <b>D05-H06</b> | S30° 53.027' E153° 04.037' | 62 |
| Eastern       | H06             | NSW: South West Rocks                 | Headland     | <b>D05-H06</b> | S30° 52.710' E153° 04.549' | 62 |
| South-eastern | H07             | NSW: Port Macquarie                   | Headland     | -              | S31° 28.526' E152° 56.219' | 60 |
| South-eastern | H03             | NSW: Kiama                            | Headland     | -              | S34° 40.301' E150° 51.704' | 63 |
| South-eastern | D12             | NSW: Bermagui                         | Dune         | D12-H14        | S36° 28.346' E150° 03.581' | 62 |
| South-eastern | H14             | NSW: Green Cape                       | Headland     | D12-H14        | S37° 15.748' E150° 02.991' | 62 |
| South-eastern | D32             | VIC: Cape Bridgewater                 | Dune         | <b>D32-H12</b> | S38° 19.631' E141° 23.772' | 62 |
| South-eastern | H12             | VIC: Cape Bridgewater                 | Headland     | <b>D32-H12</b> | S38° 22.728' E141° 22.018' | 63 |
| South-eastern | H12A            | VIC: Cape Bridgewater                 | Intermediate | -              | S38° 20.282' E141° 23.896' | 62 |
| South-eastern | D14             | TAS: Port Arthur                      | Dune         | <b>D14-H15</b> | S43° 10.550' E147° 51.267' | 12 |
| South-eastern | H15             | TAS: Port Arthur                      | Headland     | <b>D14-H15</b> | S43° 11.240' E147° 50.672' | 11 |
| Western       | D35             | WA: Isthmus Hill                      | Dune         | -              | S35° 05.885' E117° 59.182' | 62 |
| Western       | D09             | WA: Leeuwin-Naturaliste National Park | Dune         | -              | S33° 46.239' E114° 59.541' | 63 |

**Supplementary Table S6. Sequencing and alignment summary for *Senecio lautus* populations**

Summary statistics for the 23 populations used within the study. The 19 individuals removed due to high missing data are not included.

| <b>Population code</b> | <b>Mean # clean reads (range)</b>  | <b>Mean % mapped reads (range)</b> | <b>% mapped reads properly paired (range)</b> |
|------------------------|------------------------------------|------------------------------------|-----------------------------------------------|
| D00                    | 2,138,896 (971,466 - 3,506,240)    | 94 (62 - 98)                       | 92 (61 - 96)                                  |
| H00                    | 3,075,580 (1,528,536 - 6,198,407)  | 81 (16 - 97)                       | 79 (16 - 95)                                  |
| D02                    | 2,714,361 (895,858 - 5,258,091)    | 80 (18 - 96)                       | 76 (17 - 94)                                  |
| D03                    | 3,160,935 (2,015,566 - 8,748,545)  | 84 (21 - 97)                       | 78 (20 - 95)                                  |
| H02                    | 2,772,081 (1,408,465 - 4,192,718)  | 85 (34 - 96)                       | 83 (33 - 94)                                  |
| H04                    | 3,176,210 (1,695,120 - 5,950,574)  | 90 (72 - 97)                       | 79 (60 - 95)                                  |
| D01                    | 3,061,253 (1,318,262 - 4,548,766)  | 96 (83 - 98)                       | 90 (72 - 96)                                  |
| H01                    | 2,770,561 (1,105,881 - 6,164,034)  | 93 (42 - 98)                       | 91 (36 - 96)                                  |
| D04                    | 2,922,712 (2,146,253 - 3,718,635)  | 91 (62 - 98)                       | 83 (61 - 96)                                  |
| H05                    | 2,866,233 (1,754,603 - 4,696,562)  | 92 (71 - 97)                       | 85 (67 - 95)                                  |
| D05                    | 2,854,456 (1,554,814 - 4,156,601)  | 93 (48 - 97)                       | 87 (44 - 94)                                  |
| H06                    | 2,112,573 (1,253,010 - 3,538,428)  | 84 (37 - 97)                       | 82 (36 - 95)                                  |
| H07                    | 3,116,096 (1,646,581 - 10,437,355) | 82 (27 - 98)                       | 73 (21 - 96)                                  |
| H03                    | 2,795,169 (1,593,958 - 5,514,042)  | 77 (15 - 97)                       | 76 (14 - 95)                                  |
| D12                    | 2,700,235 (1,448,045 - 5,032,607)  | 90 (45 - 98)                       | 83 (39 - 94)                                  |
| H14                    | 3,033,007 (1,661,205 - 8,349,758)  | 71 (11 - 96)                       | 67 (11 - 95)                                  |
| D32                    | 2,854,449 (1,517,908 - 5,609,011)  | 79 (19 - 97)                       | 76 (17 - 95)                                  |
| H12                    | 2,892,473 (1,220,369 - 4,774,451)  | 83 (34 - 97)                       | 80 (33 - 94)                                  |
| H12A                   | 2,614,734 (1,509,934 - 8,120,979)  | 85 (27 - 98)                       | 82 (27 - 95)                                  |
| D14                    | 2,894,283 (1,704,586 - 4,893,613)  | 94 (75 - 98)                       | 85 (58 - 95)                                  |
| H15                    | 3,229,783 (1,823,447 - 4,958,055)  | 90 (33 - 97)                       | 84 (29 - 94)                                  |
| D35                    | 2,987,725 (1,754,767 - 6,004,276)  | 90 (62 - 98)                       | 78 (44 - 95)                                  |
| D09                    | 3,008,471 (1,794,627 - 4,826,686)  | 67 (21 - 96)                       | 63 (20 - 92)                                  |

## Supplementary Fig. S1 Summary of TreeMix runs

(A) Maximum likelihood tree with no migration. (B) Residuals for the no migration tree. (C) Log-likelihoods for each model for 1-25 migration events. (D) Proportion of variance explained by each model for 1-25 migration events.

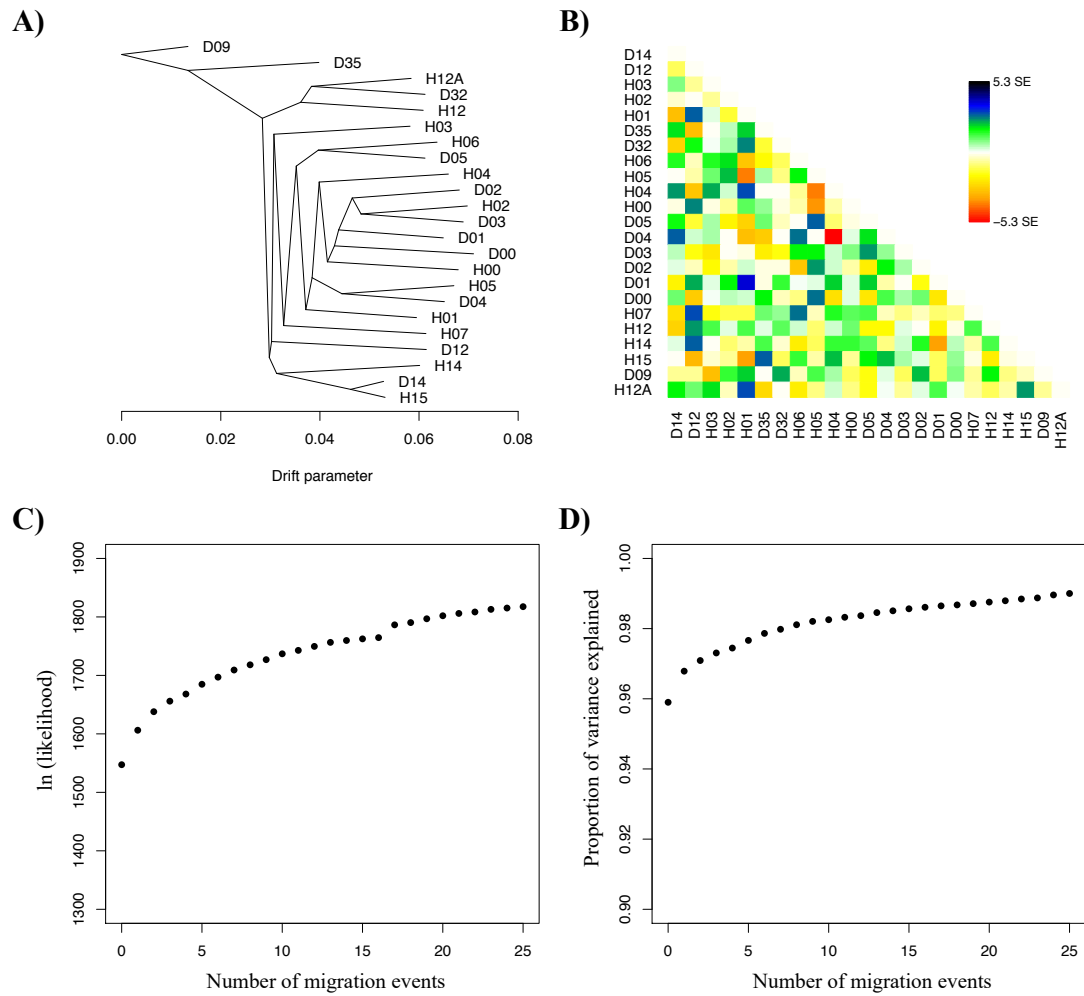

## Supplementary Fig. S2 TreeMix migration events 1-10

Maximum likelihood tree with 10 migration events. Colored arrows denote the intensity and direction of migration events.

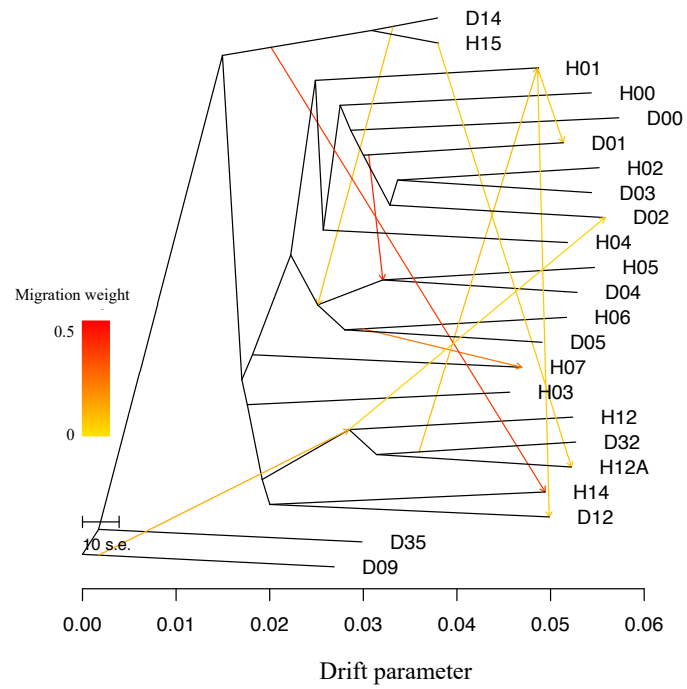

### Supplementary Fig. S3 Frequency distribution of $f_3$ -statistics

Frequency distribution of  $f_3$ -statistics calculated in *TreeMix* across all populations.

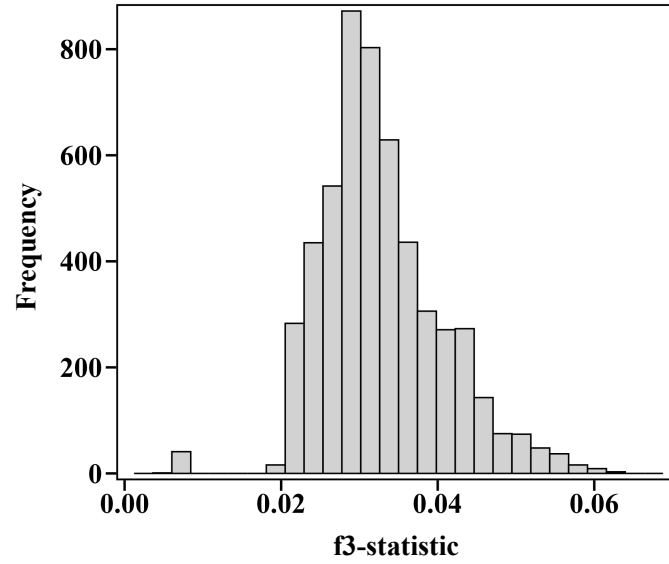

### Supplementary Fig. S4 *fastSTRUCTURE* K=22, K=28 and marginal likelihoods

**(A)** Bayesian assignment of individuals to genetic clusters within *fastSTRUCTURE* for K=22 and K = 28. Each of the 1,319 individuals is depicted as a bar, with colors representing ancestry proportions to each cluster. Populations are ordered according to their geographic distribution along the coast. **(B)** Marginal likelihood values for successive K-values within *fastSTRUCTURE*. Red dashed lines denote the K-value that best explained the structure in the data (K = 22), as well as the K-value that maximized the marginal likelihood of the data (K = 28). **(C)** Change in marginal likelihoods from *fastSTRUCTURE* for successive K-values. Red dashed line denotes K = 23, higher K-values produce a negligible change in likelihood values.

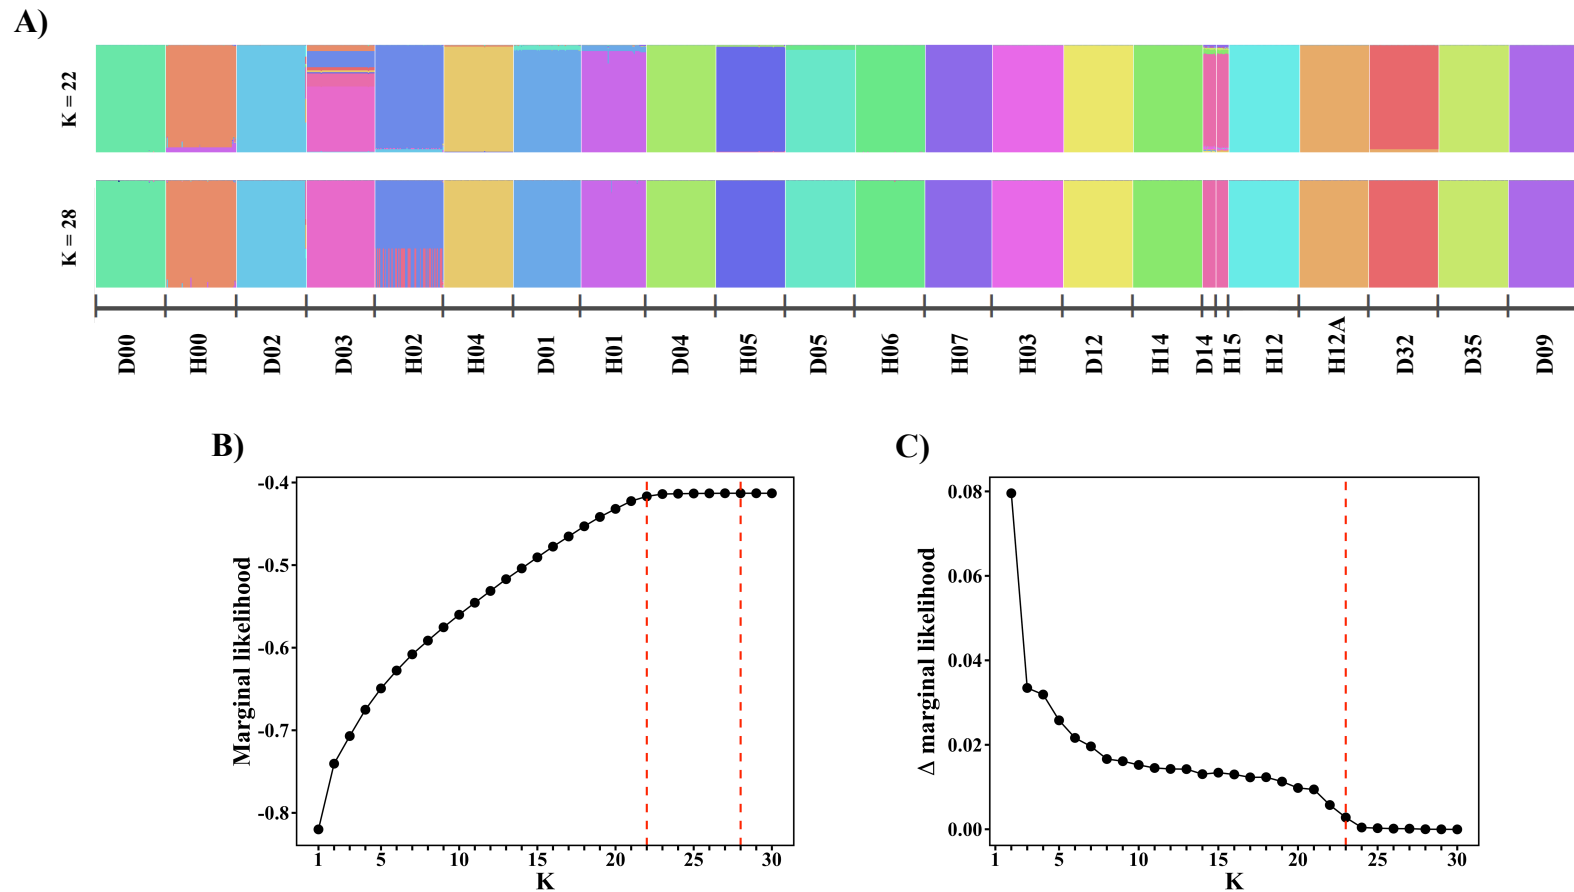



**Supplementary Fig. S5 *STRUCTURE* best K-values for the Dune-Headland pairs**

*STRUCTURE* best K-values for the eight Dune-Headland replicate pairs based on the maximum value for  $\Delta K$  (the second order rate of change in the log probability of data between successive K-values).

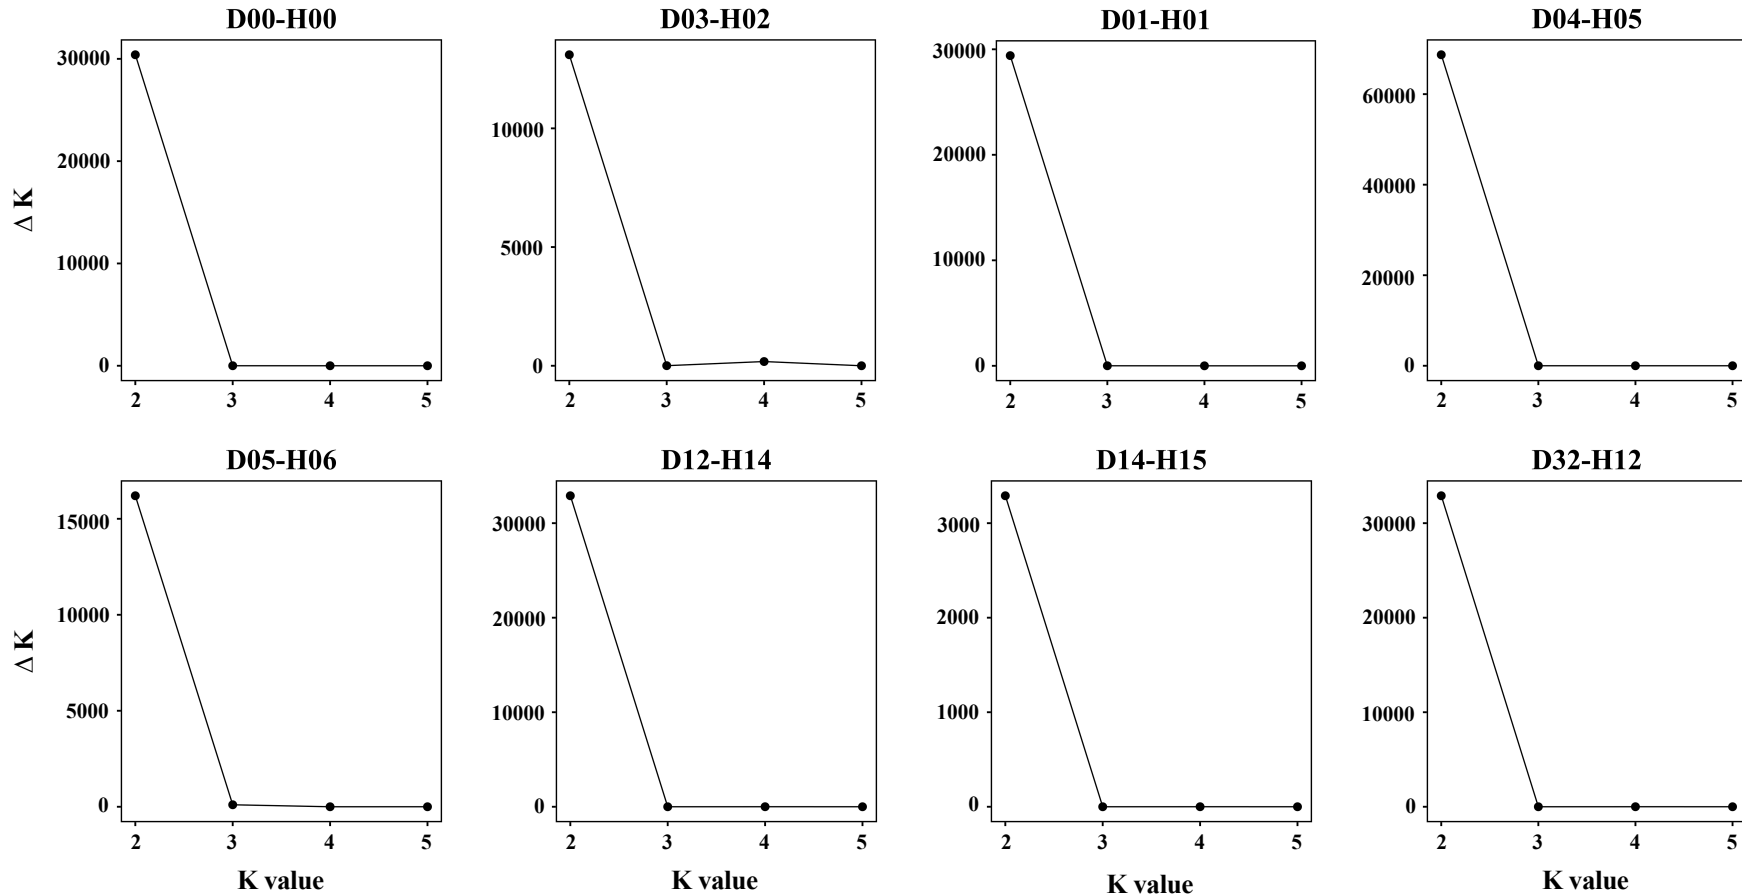

**Supplementary Fig. S6 Log-likelihood values for the eight demographic models tested in *fastsimcoal2* per pair**

NM: no migration. BM: bidirectional migration. M21: migration from population 2 to 1. M12: migration from population 1 to 2. BSC: bidirectional migration after secondary contact. SC21: migration from population 2 to 1 after secondary contact. SC12: migration from population 1 to 2 after secondary contact. EBM: bidirectional migration after population splitting with cessation of gene flow.

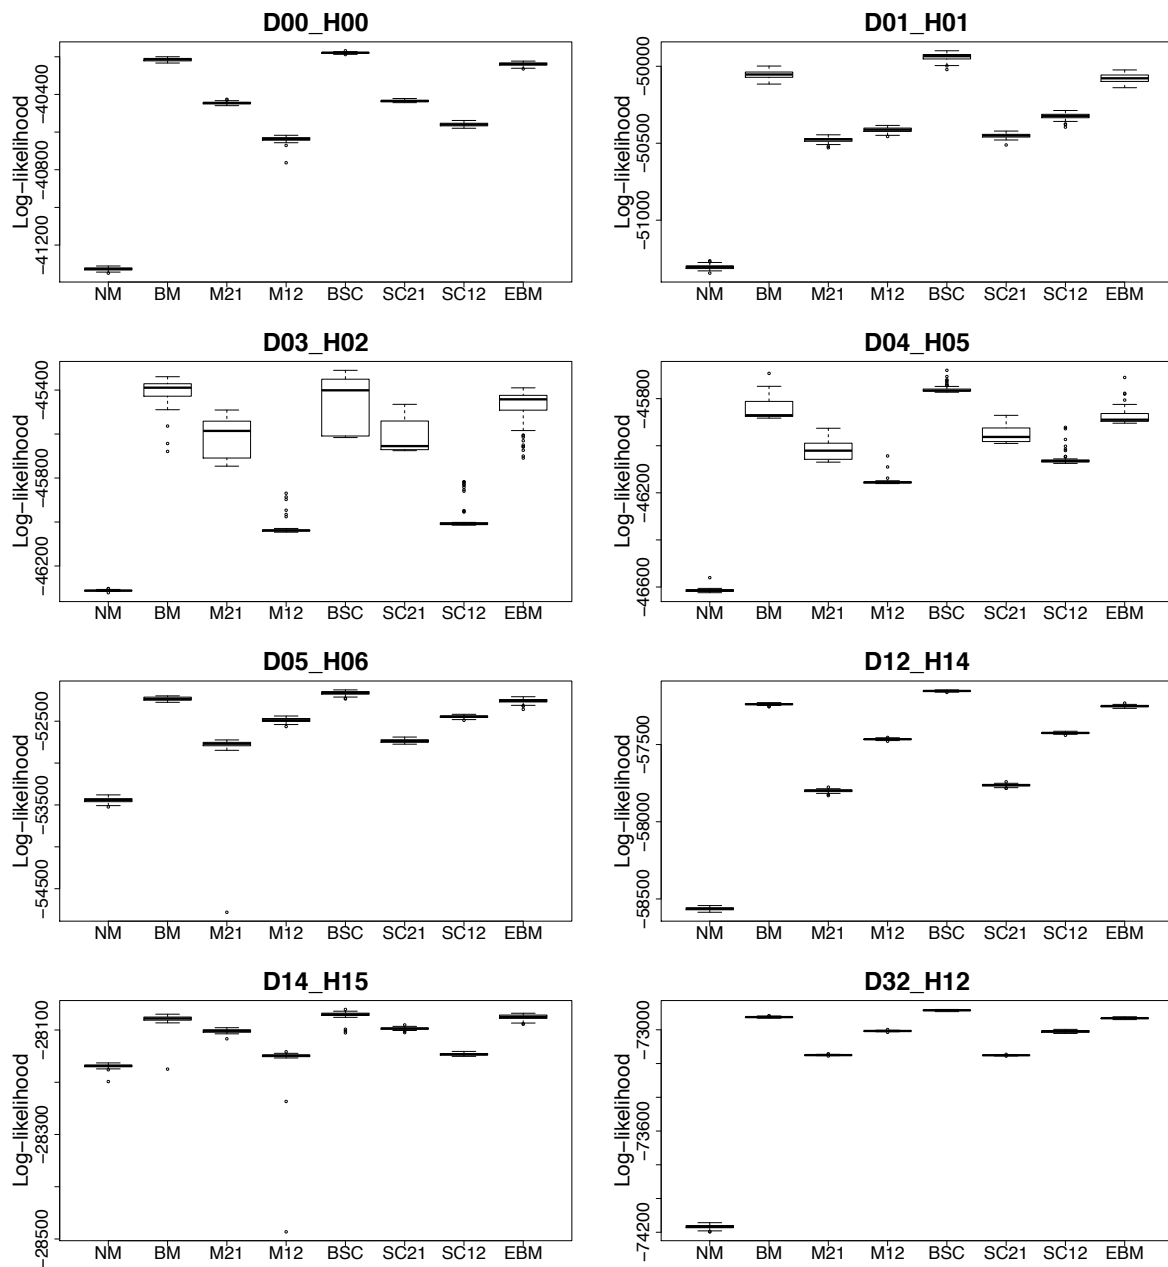

Supplementary Fig. S6 cont.

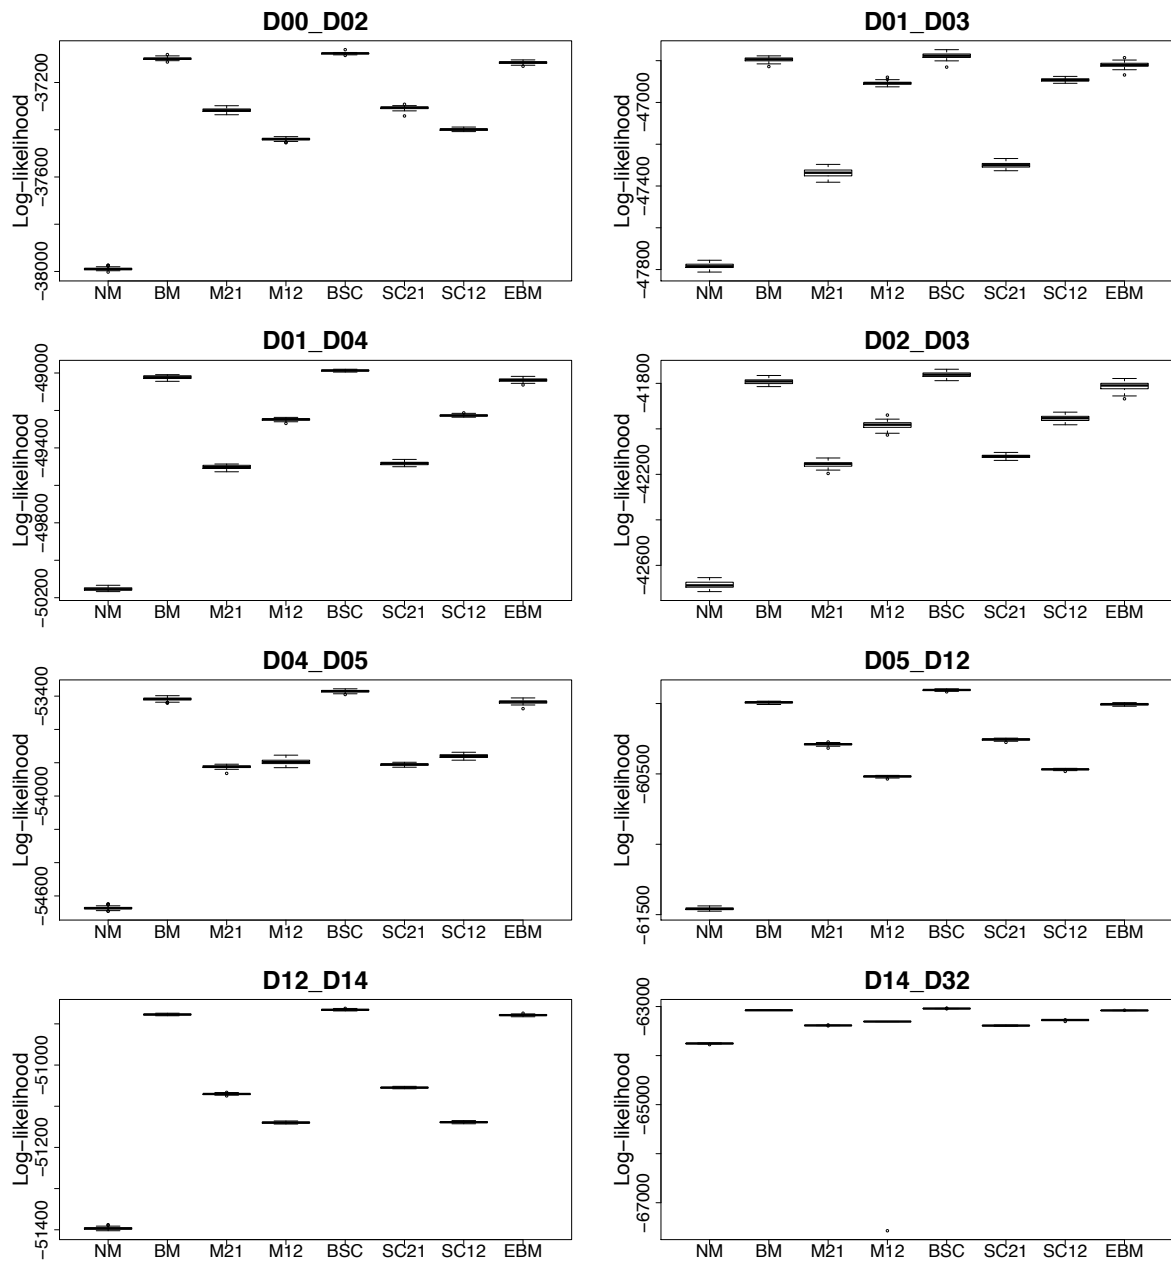

Supplementary Fig. S6 cont.

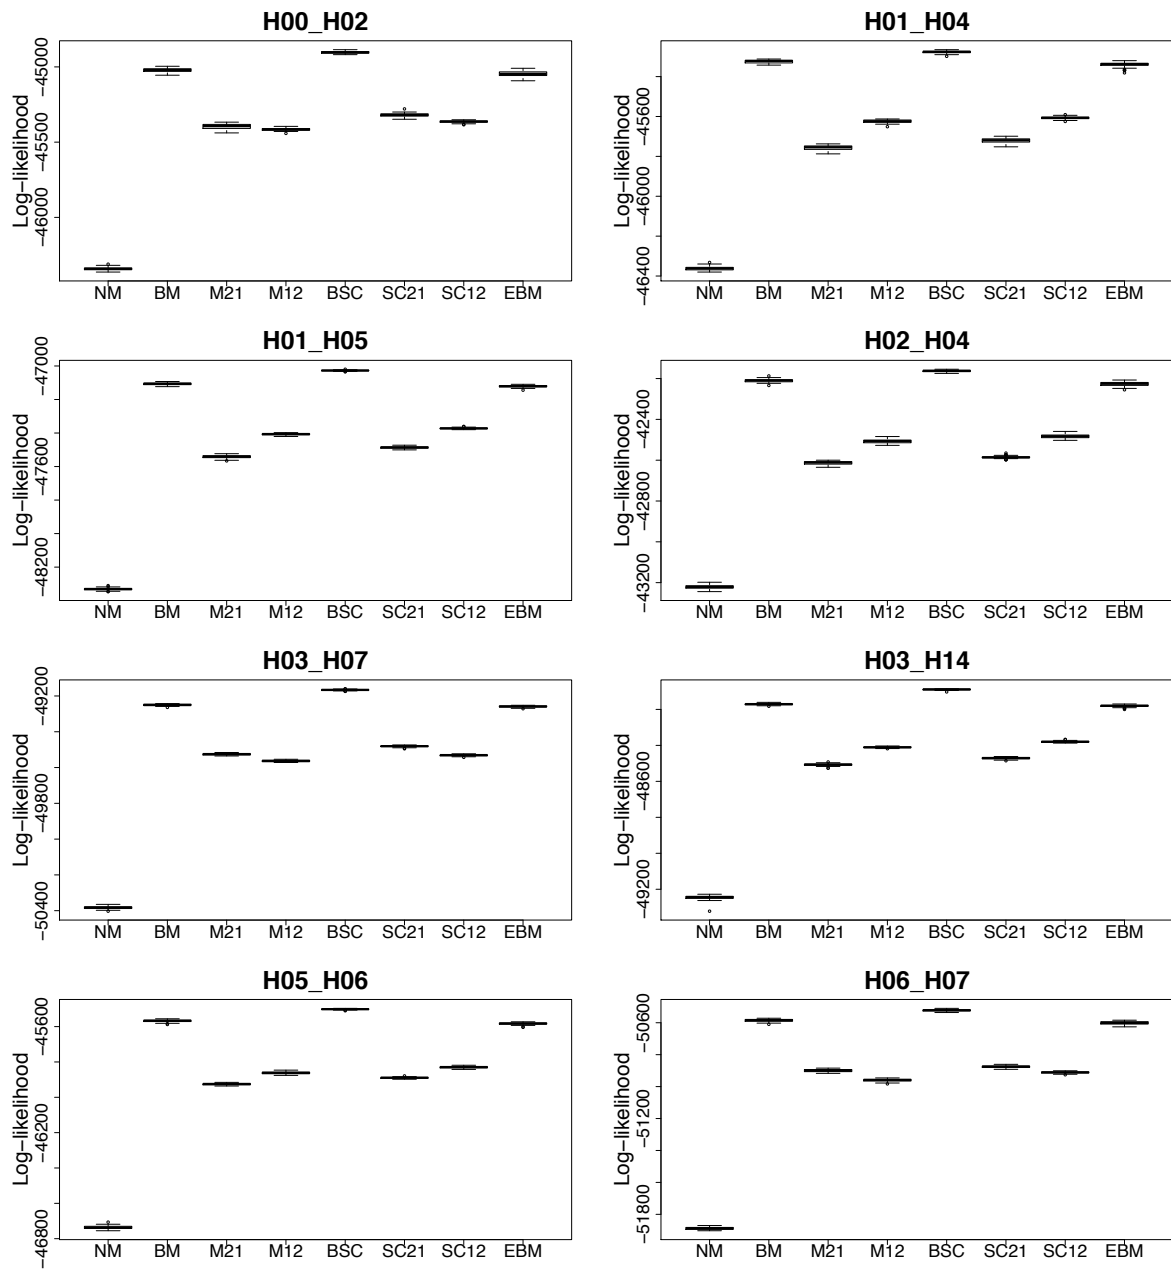

Supplementary Fig. S6 cont.

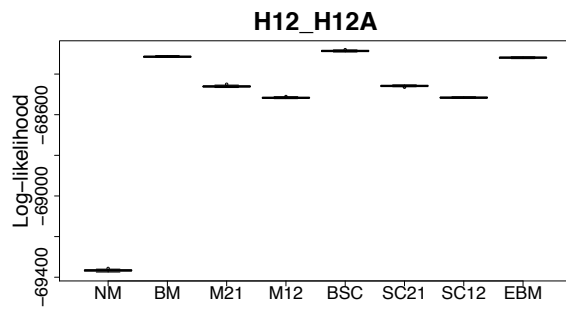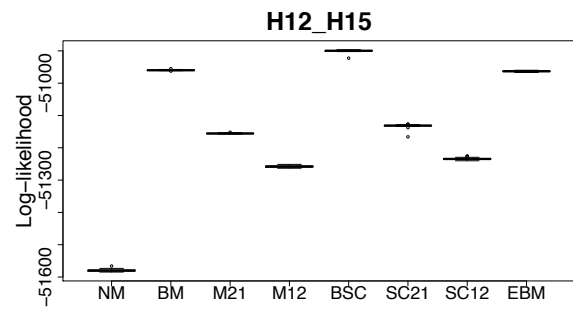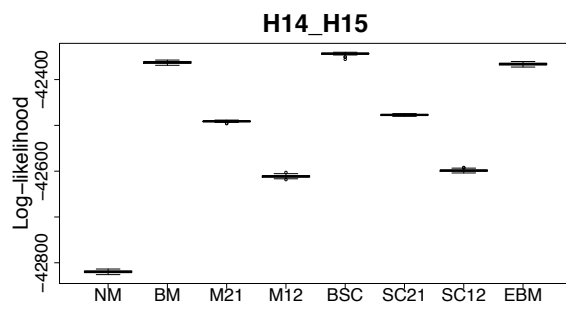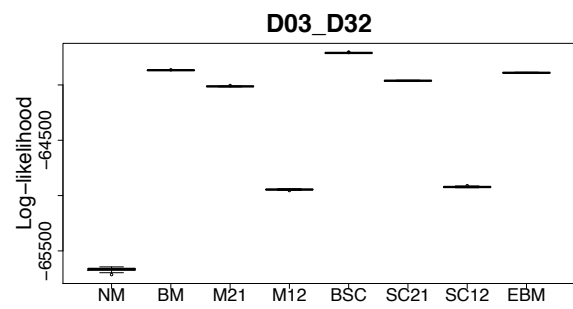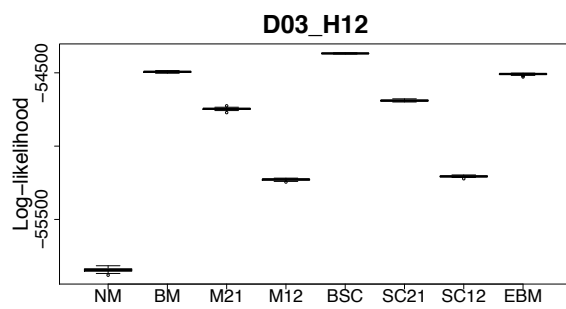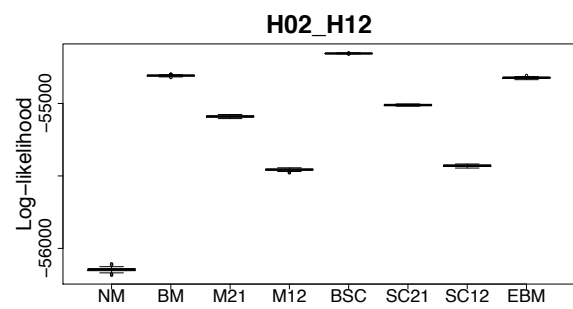

### Supplementary Fig. S7 Likelihood values for testing whether gene flow is negligible

*Max L*: maximum likelihood for the best run from the best model. *A*: fixed negligible gene flow ( $2Nm = 0.01$ ) from population 2 (on the right) to population 1 (on the left). *B*: fixed negligible gene flow from population 1 to 2 ( $2Nm = 0.01$ ). *C*: fixed negligible gene flow in both directions ( $2Nm = 0.01$ ). The asterisk denotes the pair where at least one of the migration rates is not significantly different from  $2Nm = 0.01$ .

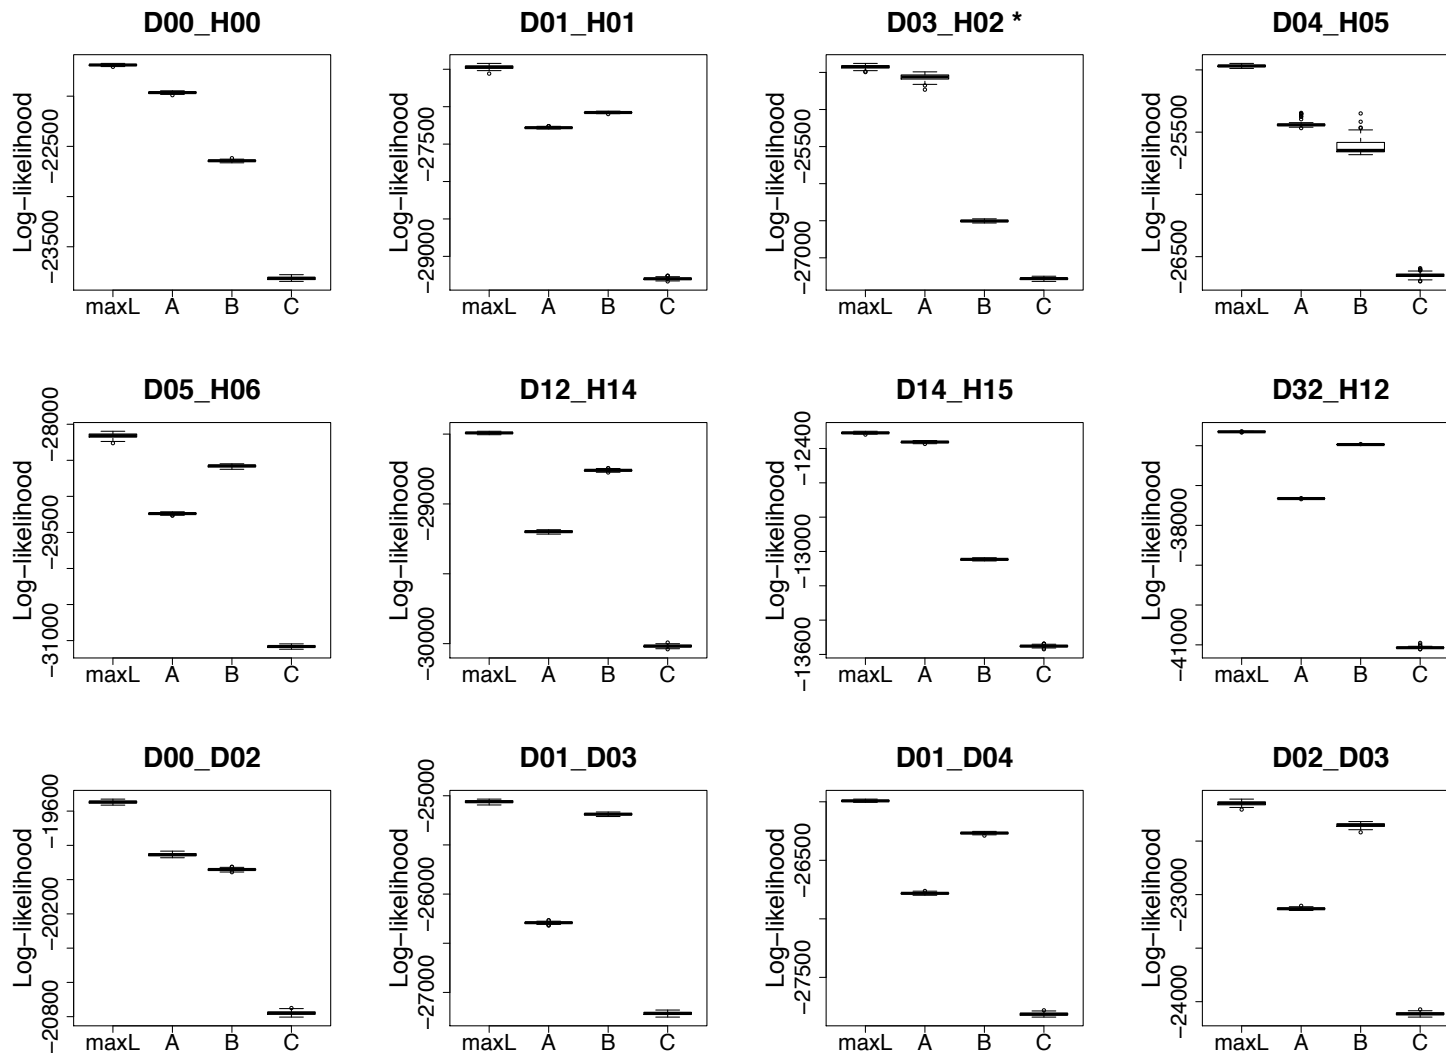

Supplementary Fig. S7 cont.

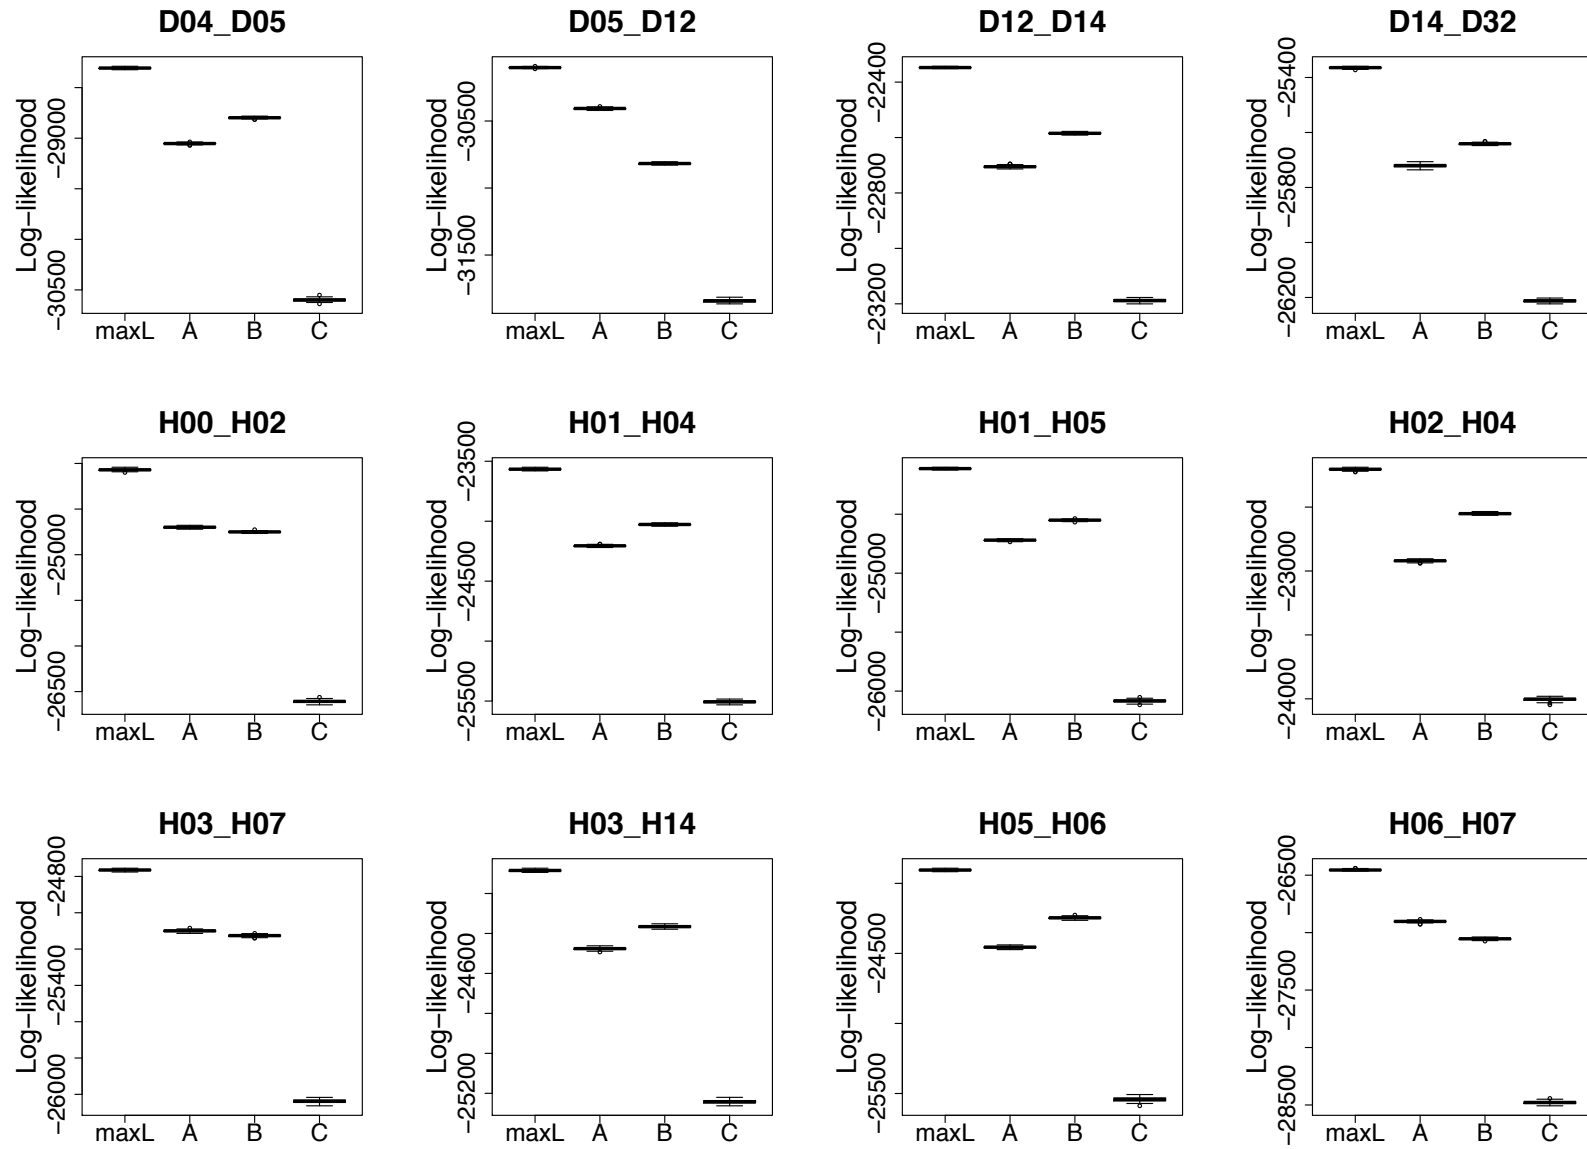

Supplementary Fig. S7 cont.

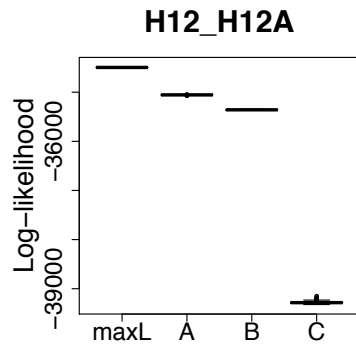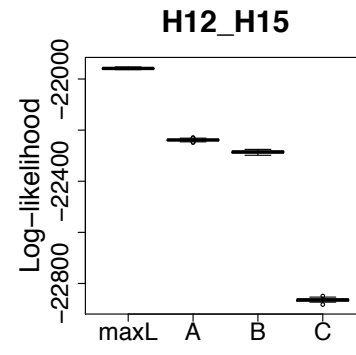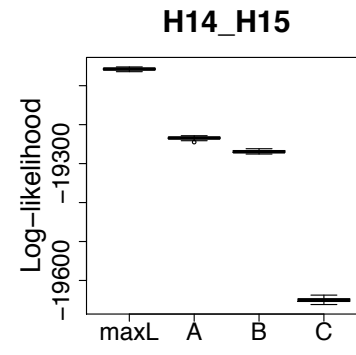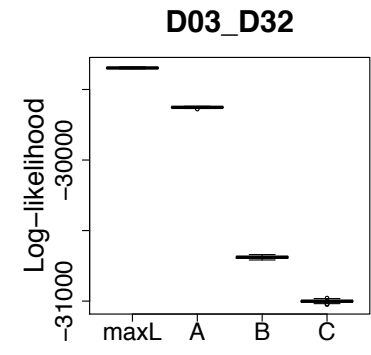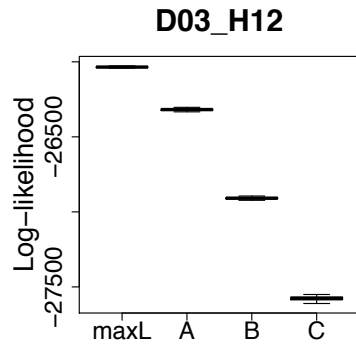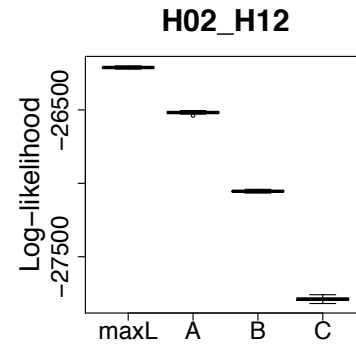



## Supplementary methods

### Estimation of monomorphic sites per pair

To estimate the number of monomorphic sites per pair we first calculated the number of RAD loci by using *PLINK* to thin for one SNP per RAD locus. The total read length of each RAD locus was (on average) 190bp (taking into account the length of the sequencing read after removal of barcodes/indexes). We used the following formula to calculate the number of monomorphic sites per pair:

$$\text{Monomorphic sites} = (\text{read length} \times \text{number RAD loci}) - \text{number variable sites}$$

Here, we may be slightly overestimating the number of monomorphic sites as we are assuming all sites without a called SNP are monomorphic, although some could be actual variants that were not called due to not passing filtering requirements. Nevertheless, the parameter estimates (especially the migration rates) were robust to varying the number of monomorphic sites (data not shown).

### Probabilities of gene flow distorting phylogeny topology

Consider a phylogeny of four populations, referred to as P1, P2, P3, P4. We have observed a species/population topology in which populations P3 and P4 are not sister. If we assume that the true species/population tree has the topology ((P1, P2), (P3, P4)), what is the probability that P3 and P4 are not sister under a model containing gene flow between P1 and P3 and between P2 and P4?

Alleles x1, x2, x3, x4 represent four lineages which are sampled from the respective populations at the present ( $t = 0$ ). The lineages will be traced backwards in time, tracking coalescent events. The MRCA common ancestor of the sampled lineages is denoted x1,2,3,4. Other common ancestors are denoted likewise. Migration occurs from P1 to P3 and from P2 to P4 at  $t_m$ . Migration occurs as an instantaneous burst and the parameter  $m$  represents the fraction of alleles in the recipient populations replaced by migrant alleles from the donor population. Divergence between P1 and P2 and between P3 and P4 occurs at time  $t_1$ . The ancestor of P1 and P2 diverges from the ancestor of P3 and P4 at time  $t_2$ .

The approach below will sum coalescent probabilities of all mutually exclusive ways in which (3,4) are not closest relatives. The probability of each scenario will be assigned to a variable and these will be summed at the end. Probabilities will be conditioned on whether x3 and x4 are descended from migrant alleles.

#### Condition on x3 being descended from a migrant, x4 not descended from a migrant

S1. x1 and x3 coalesce between  $t_m$  and  $t_1$

$$\text{In[1]:= } S1 = 1 - E^{-(t_1 - t_m)}$$

$$\text{Out[1]= } 1 - e^{-t_1 + t_m}$$

S2. x1 and x3 don't coalesce between  $t_m$  and  $t_1$ . In the ancestral lineage containing exclusively x1, x2, and x3, a single coalescent event occurs between  $t_1$  and  $t_2$ . That coalescent event is either (x3 with x1) or (x3 with x2).

$$\text{In[2]:= } t = t_2 - t_1$$

$$\text{OneCoal} = \text{Integrate}[3 E^{-3s} (E^{-(t-s)}), \{s, 0, (t)\}]$$

$$S2 = (1 - S1) \text{OneCoal} (2/3)$$

$$\text{Out[2]= } -t_1 + t_2$$

$$\text{Out[3]= } \frac{3}{2} e^{t_1 - 3t_2} (-e^{2t_1} + e^{2t_2})$$

$$\text{Out[4]= } e^{-3t_2 + t_m} (-e^{2t_1} + e^{2t_2})$$

S3. x1 and x3 don't coalesce between  $t_m$  and  $t_1$ . In the ancestral lineage containing exclusively x1, x2, and x3, a single coalescent event occurs between  $t_1$  and  $t_2$ . That coalescent event is (x1 with x2). In the ancestral lineage containing x1,2, x3, and x4, the first coalescent event that occurs is either (x1,2 with x3) or (x1,2 with x4).

$$\text{In[5]:= } S3 = (1 - S1) \text{OneCoal} (1/3) (2/3)$$

$$\text{Out[5]= } \frac{1}{3} e^{-3t_2 + t_m} (-e^{2t_1} + e^{2t_2})$$

S4. x1 and x3 don't coalesce between  $t_m$  and  $t_1$ . In the ancestral lineage containing exclusively x1, x2, and x3, two coalescent events occur, the first is (x1 with x2) and the second is (x1,2 with x3)

In[6]:= TwoCoal = Integrate[3 E^(-3 s) (1 - E^(-(t - s))), {s, 0, t}]

S4 = (1 - S1) TwoCoal (1/3)

$$\text{Out[6]} = \frac{1}{2} (2 + e^{3 t_1 - 3 t_2} - 3 e^{t_1 - t_2})$$

$$\text{Out[7]} = \frac{1}{6} e^{-t_1 + t_m} (2 + e^{3 t_1 - 3 t_2} - 3 e^{t_1 - t_2})$$

S5. x1 and x3 don't coalesce between  $t_m$  and  $t_1$ . In the ancestral lineage containing exclusively x1, x2, and x3, zero coalescent events occur between  $t_1$  and  $t_2$ . In the ancestral lineage containing x1, x2, x3, and x4, the first coalescent event that occurs is one of (x3 with x1), (x3 with x2), (x1 with x4), (x2 with x4).

In[8]:= S5 = (1 - S1) E^(-3 (t2 - t1)) (4/6)

$$\text{Out[8]} = \frac{2}{3} e^{-t_1 - 3(-t_1 + t_2) + t_m}$$

S6. x1 and x3 don't coalesce between  $t_m$  and  $t_1$ . In the ancestral lineage containing exclusively x1, x2, and x3, zero coalescent events occur between  $t_1$  and  $t_2$ . In the ancestral lineage containing x1, x2, x3, and x4, the first coalescent event that occurs is (x1 with x2). The next coalescent event to occur is either (x1,2 with x3) or (x1,2 with x4).

In[9]:= S6 = (1 - S1) E^(-3 (t2 - t1)) (1/6) (2/3)

$$\text{Out[9]} = \frac{1}{9} e^{-t_1 - 3(-t_1 + t_2) + t_m}$$

Putting this together, the probability that x3 is descended from a migrant, x4 is not descended from a migrant, and that conditional on this scenario x3 and x4 do not appear as sister in the phylogeny is:

In[10]:= Prob1 = m (1 - m) (S1 + S2 + S3 + S4 + S5 + S6)

$$\text{Out[10]} = \left( 1 - e^{-t_1 + t_m} + \frac{7}{9} e^{-t_1 - 3(-t_1 + t_2) + t_m} + \frac{1}{6} e^{-t_1 + t_m} (2 + e^{3 t_1 - 3 t_2} - 3 e^{t_1 - t_2}) + \frac{4}{3} e^{-3 t_2 + t_m} (-e^{2 t_1} + e^{2 t_2}) \right) (1 - m) m$$

### Condition on x4 being descended from a migrant, x3 not descended from a migrant

By symmetry, the probability that x4 is descended from a migrant, x3 is not descended from a migrant, and that conditional on this scenario x3 and x4 not being each other's closest relatives is:

In[11]:= Prob2 = Prob1

$$\text{Out[11]} = \left( 1 - e^{-t_1 + t_m} + \frac{7}{9} e^{-t_1 - 3(-t_1 + t_2) + t_m} + \frac{1}{6} e^{-t_1 + t_m} (2 + e^{3 t_1 - 3 t_2} - 3 e^{t_1 - t_2}) + \frac{4}{3} e^{-3 t_2 + t_m} (-e^{2 t_1} + e^{2 t_2}) \right) (1 - m) m$$

### Condition on neither x3 nor x4 being descended from migrants

S7. x3 and x4 don't coalesce between  $t_1$  and  $t_2$ . x1 and x2 don't coalesce between  $t_1$  and  $t_2$ . In the ancestral lineage containing x1, x2, x3, and x4, the first coalescent event is one of (x3 with x1), (x3 with x2), (x1 with x4), (x2 with x4).

In[12]:= S7 = (E^(-(t2 - t1)))^2 (4/6)

$$\text{Out[12]} = \frac{2}{3} e^{2 t_1 - 2 t_2}$$

S8. x3 and x4 don't coalesce between  $t_1$  and  $t_2$ . x1 and x2 don't coalesce between  $t_1$  and  $t_2$ . In the ancestral lineage containing x1, x2, x3, and x4, the first coalescent event is (x1 with x2). The next coalescent event is one of (x1,2 with x3), (x1,2, x4).

$$\text{In[13]:} = S8 = (E^{-(t2 - t1)})^2 (1/6) (2/3)$$

$$\text{Out[13]:} = \frac{1}{9} e^{2 t1 - 2 t2}$$

S9. x3 and x4 don't coalesce between t1 and t2. x1 and x2 coalesce between t1 and t2. In the ancestral lineage containing x1,2, x3, and x4, the first coalescent event is one of (x1,2 with x3), (x1,2, x4).

$$\text{In[14]:} = S9 = E^{-(t2 - t1)} (1 - E^{-(t2 - t1)}) (2/3)$$

$$\text{Out[14]:} = \frac{2}{3} e^{t1 - t2} (1 - e^{t1 - t2})$$

Putting this together, the probability that neither x3 nor x4 are descended from migrants, and conditional on this x3 and x4 not being each other's closest relatives is:

$$\text{In[15]:} = \text{Prob3} = (1 - m)^2 (S7 + S8 + S9)$$

$$\text{Out[15]:} = \left( \frac{7}{9} e^{2 t1 - 2 t2} + \frac{2}{3} e^{t1 - t2} (1 - e^{t1 - t2}) \right) (1 - m)^2$$

#### Condition on both x3 and x4 being descended from migrants.

S10. x1 and x3 coalesce between tm and t1. x2 and x4 do not coalesce between tm and t1.

$$\text{In[16]:} = S10 = (1 - E^{-(t1 - tm)}) E^{-(t1 - tm)}$$

$$\text{Out[16]:} = e^{-t1 + tm} (1 - e^{-t1 + tm})$$

S11. x1 and x3 do not coalesce between tm and t1. x2 and x4 coalesce between tm and t1. By symmetry, this is the same as above

$$\text{In[17]:} = S11 = S10$$

$$\text{Out[17]:} = e^{-t1 + tm} (1 - e^{-t1 + tm})$$

S12. x1 and x3 coalesce between tm and t1. x2 and x4 coalesce between tm and t1.

$$\text{In[18]:} = S12 = (1 - E^{-(t1 - tm)})^2$$

$$\text{Out[18]:} = (1 - e^{-t1 + tm})^2$$

S13. x1 and x3 do not coalesce between tm and t1. x2 and x4 do not coalesce between tm and t1. In the ancestral lineage containing x1, x2, x3, and x4, the first coalescent event is one of (x3 with x1), (x3 with x2), (x1 with x4), (x2 with x4).

$$\text{In[19]:} = S13 = (E^{-(t1 - tm)})^2 (4/6)$$

$$\text{Out[19]:} = \frac{2}{3} e^{-2 t1 + 2 tm}$$

S14. x1 and x3 do not coalesce between tm and t1. x2 and x4 do not coalesce between tm and t1. In the ancestral lineage containing x1, x2, x3, and x4, the first coalescent event is (x1 with x2). The next coalescent event is either (x1,2 with x3) or (x1,2 with x4).

$$\text{In[20]:} = S14 = (E^{-(t1 - tm)})^2 (1/6) (2/3)$$

$$\text{Out[20]:} = \frac{1}{9} e^{-2 t1 + 2 tm}$$

Putting this together, the probability of x3 and x4 both being descended from migrant alleles, and conditional on this x3 and x4 not being each other's closest relatives is:

$$\text{In[21]:= Prob4} = m^2 (S10 + S11 + S12 + S13 + S14)$$

$$\text{Out[21]=} \left( \frac{7}{9} e^{-2t_1+2tm} + 2 e^{-t_1+tm} (1 - e^{-t_1+tm}) + (1 - e^{-t_1+tm})^2 \right) m^2$$

---

**Then from the law of total probability, we have that the probability of x3 and x4 not being each other's closest relatives is:**

$$\text{In[22]:= P} = \text{Prob1} + \text{Prob2} + \text{Prob3} + \text{Prob4}$$

$$\begin{aligned} \text{Out[22]=} & \left( \frac{7}{9} e^{2t_1-2t_2} + \frac{2}{3} e^{t_1-t_2} (1 - e^{t_1-t_2}) \right) (1 - m)^2 + \\ & 2 \left( 1 - e^{-t_1+tm} + \frac{7}{9} e^{-t_1-3(-t_1+t_2)+tm} + \frac{1}{6} e^{-t_1+tm} (2 + e^{3t_1-3t_2} - 3e^{t_1-t_2}) + \frac{4}{3} e^{-3t_2+tm} (-e^{2t_1} + e^{2t_2}) \right) (1 - m) m + \\ & \left( \frac{7}{9} e^{-2t_1+2tm} + 2 e^{-t_1+tm} (1 - e^{-t_1+tm}) + (1 - e^{-t_1+tm})^2 \right) m^2 \end{aligned}$$

---

### Visuals

$$\text{In[23]:= PPlot1} = \text{P} /. t2 \rightarrow (t3 + t1) /. t1 \rightarrow 1 /. tm \rightarrow .1$$

$$\text{PPlot2} = \text{P} /. t2 \rightarrow t1 + 1 /. t1 \rightarrow tm + t4 /. tm \rightarrow .1$$

$$\begin{aligned} \text{Out[23]=} & \left( \frac{7}{9} e^{2-2(1+t_3)} + \frac{2}{3} e^{-t_3} (1 - e^{-t_3}) \right) (1 - m)^2 + \\ & 2 \left( 0.59343 + \frac{7}{9} e^{-0.9-3t_3} + \frac{4}{3} e^{0.1-3(1+t_3)} (-e^2 + e^{2(1+t_3)}) + 0.0677616 (2 - 3e^{-t_3} + e^{3-3(1+t_3)}) \right) (1 - m) m + \\ & 0.963267 m^2 \end{aligned}$$

$$\begin{aligned} \text{Out[24]=} & \left( \frac{2(1 - \frac{1}{e})}{3e} + \frac{7}{9} e^{2(0.1+t_4)-2(1.1+t_4)} \right) (1 - m)^2 + \\ & 2 \left( 1 + \frac{7e^{-3-t_4}}{9} - e^{-t_4} + \frac{4}{3} e^{0.1-3(1.1+t_4)} (-e^{2(0.1+t_4)} + e^{2(1.1+t_4)}) + \frac{1}{6} e^{-t_4} \left( 2 - \frac{3}{e} + e^{3(0.1+t_4)-3(1.1+t_4)} \right) \right) (1 - m) m + \\ & \left( \frac{7}{9} e^{0.2-2(0.1+t_4)} + 2 e^{-t_4} (1 - e^{-t_4}) + (1 - e^{-t_4})^2 \right) m^2 \end{aligned}$$

```

In[25]:= ContourPlot [PPlot1 , {m, 0, .1}, {t3, ((1/50)), 1}, PlotLegends -> Automatic ,
  Axes -> False, Frame -> {True, True, False, False}, FrameLabel -> {m, t2 - t1},
  LabelStyle -> Directive [FontSize -> 16], FrameTicksStyle -> Directive [FontSize -> 14]]
ContourPlot [PPlot2 , {m, 0, .1}, {t4, ((1/50)), 1}, PlotLegends -> Automatic ,
  Axes -> False, Frame -> {True, True, False, False}, FrameLabel -> {m, t1 - tm},
  FrameTicksStyle -> Directive [FontSize -> 14], LabelStyle -> Directive [FontSize -> 16]]

```

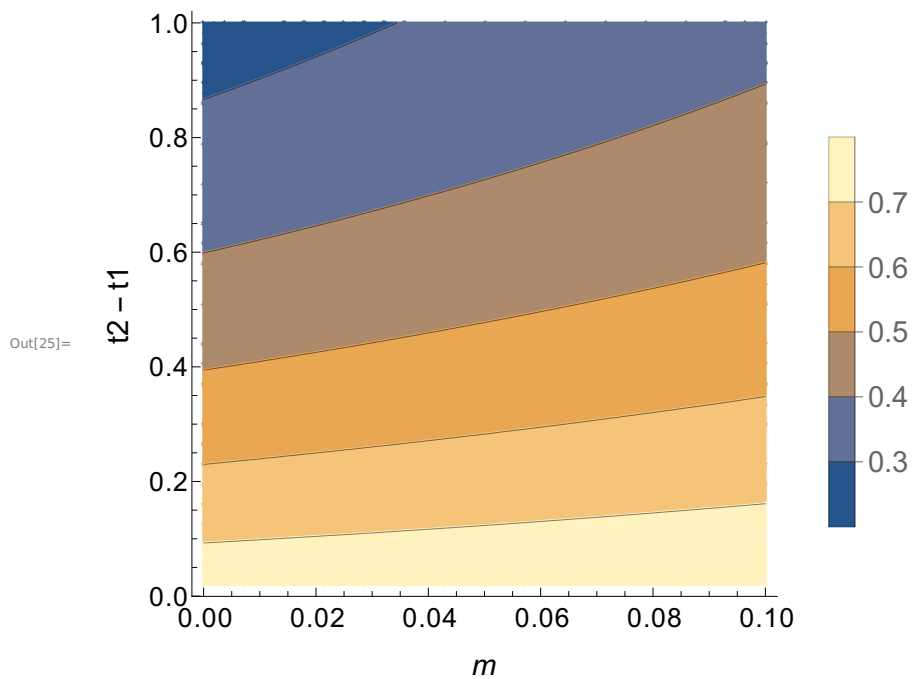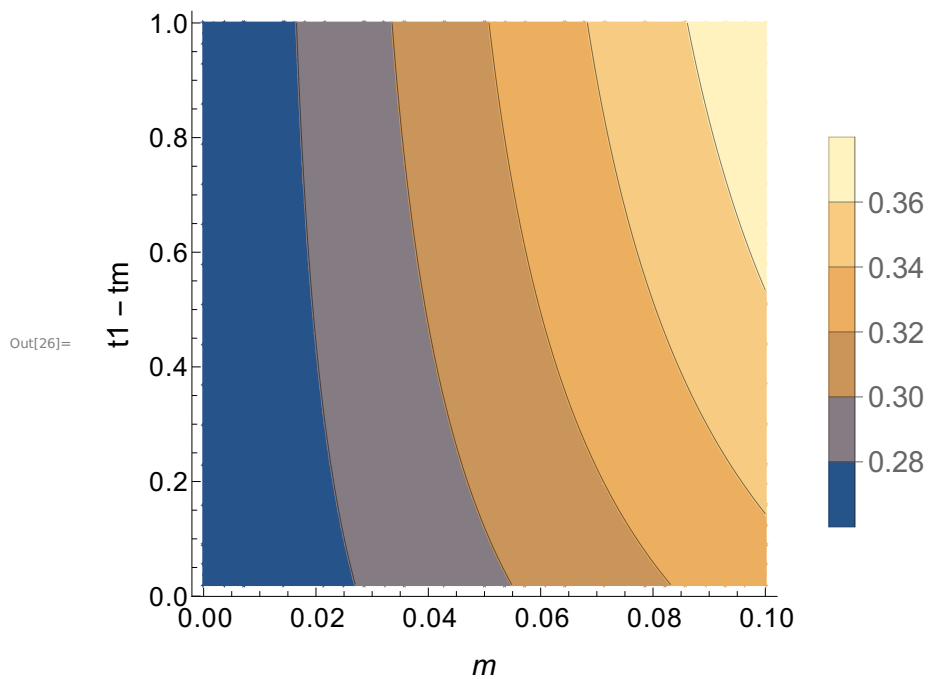

Source: https://www.biorxiv.org/content/10.1101/2020.02.05.936401v2.full.pdf
